# Interactions of the Protein Tyrosine Phosphatase PTPN3 with Viral and Cellular Partners through its PDZ Domain: Insights into Structural Determinants and Phosphatase Activity

1 **Mariano Genera<sup>1,2</sup>, Baptiste Colcombet-Cazenave<sup>1,2</sup>, Anastasia Croitoru<sup>1</sup>, Bertrand Raynal<sup>3</sup>,**  
2 **Ariel Mechaly<sup>4</sup>, Joël Caillet<sup>5</sup>, Ahmed Haouz<sup>4</sup>, Nicolas Wolff<sup>1</sup>, Célia Caillet-Saguy<sup>1\*</sup>**

3 <sup>1</sup> Institut Pasteur, Université Paris Cité, Channel Receptors Unit, UMR 3571, Paris, France.

4 <sup>2</sup> Sorbonne Université, Complexité du Vivant, F-75005, Paris, France.

5 <sup>3</sup> Molecular Biophysics Platform-C2RT, CNRS, UMR 3528, Institut Pasteur, Université Paris Cité,  
6 Paris, France.

7 <sup>4</sup> Crystallography Platform-C2RT, UMR 3528, Institut Pasteur, Université Paris Cité, Paris, France.

8 <sup>5</sup> UMR8261, CNRS, Institut de Biologie Physico-Chimique, Université Paris Cité, Paris, France.

9 **\* Correspondence:**

10 Célia Caillet-Saguy: Channel Receptors Unit, Institut Pasteur, F-75724 Paris, France; [celia.caillet-](mailto:celia.caillet-saguy@pasteur.fr)  
11 [saguy@pasteur.fr](mailto:celia.caillet-saguy@pasteur.fr)

12 **Keywords: protein tyrosine phosphatase PTPN3, X-ray crystallography, PDZ domains, PDZ-**  
13 **binding motif, enzyme kinetics, bioinformatics, protein-protein interaction, PDZome**

14 **Abstract**

15 The human protein tyrosine phosphatase non-receptor type 3 (PTPN3) is a phosphatase containing a  
16 PDZ (PSD-95/Dlg/ZO-1) domain that has been found to play both tumor-suppressive and tumor-  
17 promoting roles in various cancers, despite limited knowledge of its cellular partners and signaling  
18 functions. Notably, the high-risk genital human papillomavirus (HPV) types 16 and 18 and the hepatitis  
19 B virus (HBV) target the PDZ domain of PTPN3 through PDZ-binding motifs (PBMs) in their E6 and  
20 HBc proteins respectively.

21 This study focuses on the interactions between the PTPN3 PDZ domain (PTPN3-PDZ) and PBMs of  
22 viral and cellular protein partners. The solved X-ray structures of complexes between PTPN3-PDZ and  
23 PBMs of E6 of HPV18 and the tumor necrosis factor-alpha converting enzyme (TACE) reveal two  
24 novel interactions. We provide new insights into key structural determinants of PBM recognition by  
25 PTPN3 by screening the selectivity of PTPN3-PDZ recognition of PBMs, and by comparing the  
26 PDZome binding profiles of PTPN3-recognized PBMs and the interactome of PTPN3-PDZ.

27 The PDZ domain of PTPN3 was known to auto-inhibit the protein's phosphatase activity. We  
28 discovered that the linker connecting the PDZ and phosphatase domains is involved in this inhibition,  
29 and that the binding of PBMs does not impact this catalytic regulation.

30 Overall, the study sheds light on the interactions and structural determinants of PTPN3 with its  
31 cellular and viral partners, as well as on the inhibitory role of its PDZ domain on its phosphatase  
32 activity.

## 33 1 Introduction

34 Kinase and phosphatase proteins play a major role in cell signaling by regulating the levels of  
35 phosphorylated species in signal transduction pathways that control cellular processes such as growth,  
36 differentiation, migration, survival, and apoptosis. Large scale genetic analyses of human tumors have  
37 highlighted the relevance of protein tyrosine phosphatases either as putative tumor suppressors or as  
38 candidate oncoproteins (Julien et al., 2011). Alterations in their expression levels and/or mutations  
39 have been suggested to play a role in many cancers (Hendriks and Böhmer, 2016). Examples notably  
40 include the promotion of cholangiocarcinoma cell proliferation and migration by gain-of-function  
41 mutations or increased expression of the protein tyrosine phosphatase non-receptor type 3 (PTPN3)  
42 than in nontumor tissues (Gao et al., 2014).

43 PTPN3 is a multidomain protein of 913 amino acids comprising a N-terminal FERM domain that  
44 determines subcellular localization, a central PDZ domain involved in protein-protein interactions, a  
45 short linker of 30-residues and a C-terminal protein tyrosine phosphatase (PTP) domain able to  
46 dephosphorylate protein substrates (Figure 1). The linker that connects the FERM and PDZ domains  
47 is about 200 amino acids long and predicted mostly unstructured. The FERM-PDZ linker was shown  
48 to be cleaved *in vitro* by trypsin, releasing a fragment of around 50 kDa called bidomain that  
49 corresponds to the PDZ and PTP domains connected by the 30-residue linker (Zhang et al., 1995). The  
50 proteolytic cleavage of the FERM domain of PTPN3 increases its catalytic activity (Zhang et al., 1995).  
51 More recently, it has been reported that the PDZ domains of PTPN3 (PTPN3-PDZ) and of its homolog  
52 PTPN4 (PTPN4-PDZ) exert an inhibitory effect on the catalytic activity of the adjacent PTP domain  
53 (Chen et al., 2014; Maisonneuve et al., 2014). Moreover, we showed that the binding of a PDZ-binding  
54 motif (PBM) to the PDZ domain of PTPN4 partially releases this catalytic inhibition (Maisonneuve et  
55 al., 2014) and that the linker between the PDZ and the PTP is essential for the regulation by both the  
56 PDZ domain and the PBM (Maisonneuve et al., 2016; Caillet-Saguy et al., 2017). Only a handful of  
57 PTPN3 cellular partners and substrates have been identified, and the role of PTPN3 in cell signaling  
58 remains unclear. PTPN3 was reported both as a partner and a substrate of the mitogen-activated protein  
59 kinase (MAPK) p38 $\gamma$ , involved in Ras oncogenesis (Hou et al., 2012). PTPN3 was also reported in  
60 breast cancer by dephosphorylating the epidermal growth factor receptor (EGFR), increasing  
61 sensitivity to tyrosine kinase inhibitors (Ma et al., 2015), and by regulation of the vitamin D receptor  
62 expression and stability, which stimulates breast cancer growth (Zhi et al., 2011). PTPN3 also regulates  
63 the activity and expression of the Tumor necrosis factor alpha-convertase (TACE) protein, which  
64 impacts the release of soluble tumor necrosis factor  $\alpha$  (TNF- $\alpha$ ) (Zheng et al., 2002). In that case, PTPN3  
65 was reported to bind TACE through a PDZ-PBM interaction. Interestingly, viral proteins of  
66 oncoviruses, such as the capsid protein (HBc) of hepatitis B virus (HBV) (Hsu et al., 2007) and the E6  
67 protein of high-risk human papillomaviruses types 16 and 18 (HPV16 and 18) (Töpffer et al., 2007),  
68 possess PBMs that are able to interact with PTPN3. Targeting host PDZ domains through PBMs is a  
69 strategy developed by many viruses to hijack cellular machinery to their advantage (James and Roberts,  
70 2016). As previously shown for the rabies glycoprotein (Préhaud et al., 2010; Caillet-Saguy et al.,  
71 2015), viruses can compete with endogenous partners through their viral PBMs to disturb signaling  
72 pathways in infected cells. We previously studied the interaction between PTPN3-PDZ and the PBMs  
73 of HPV16 E6 (PBM-16E6) (Genera et al., 2019) and HBV HBc (PBM-HBc)(Genera et al., 2021). The  
74 PDZ-mediated interaction of E6 with PTPN3 results in the proteasomal degradation of the phosphatase  
75 (Jing et al., 2007). In the case of HBV, PTPN3 can impact multiple stages of the HBV life cycle and

76 interacts with viral capsids (Genera et al., 2021), although the functional role of this interaction, notably  
77 in cell signaling, has not been fully established. Indeed, the biophysical and structural studies on  
78 PTPN3 have mainly focused on the PTP domain in complex with phospho-peptide substrates derived  
79 either from the MAPK p38 $\gamma$  (Chen et al., 2014) or the EGFR substrate 15 (Chen et al., 2015),  
80 independently from the PDZ. Therefore, the interactions mediated by PTPN3-PDZ with cellular and  
81 viral proteins should be documented to further understand its function in cellular signaling.

82 Here we performed a structural and functional study of PTPN3 and its PDZ-mediated interactions. We  
83 solved the crystal structures of the complexes formed by PTPN3-PDZ with peptides comprising the  
84 PBMs of HPV 18 E6 (PBM-18E6) and of the cellular partner TACE (PBM-TACE). We compared  
85 these structures with the ones with PBM-16E6 and PBM-HBc to highlight the atomic determinants of  
86 PTPN3-PDZ/PBM recognition. We identified the crucial positions that define the selectivity of this  
87 domain focusing on the specificity determinants shared with its close homolog PTPN4. Indeed, PTPN3  
88 and PTPN4 compose the NT5 subfamily of non-receptor PTPs and share the same modular  
89 organization with 73% of sequence identity in their PDZ domains.

90 We performed bioinformatics studies to analyze the specificity of recognition of PTPN3-PDZ and  
91 PTPN4-PDZ by comparing alignments of PTPN3 and PTPN4 PDZ domains orthologous sequences  
92 versus the alignment of all human PDZ domains. We identified conserved positions that could be  
93 involved in the specificity of recognition of PBMs by these phosphatases. Additionally, sequence  
94 analysis of the PBMs captured by PTPN3-PDZ from cell lysates provided insights on the consensus  
95 sequence preferentially bound in this context. We also analyzed the PDZ domains preferentially  
96 targeted by PTPN3's PBMs from our holdup high-throughput binding assay (Vincentelli et al., 2015).

97 Finally, we characterized the regulation of PTPN3 phosphatase activity with a focus on the impact of  
98 the linker between the PDZ and the PTP domains, the inhibition by the PDZ domain, and the  
99 potential effects of the binding of PBMs of its cellular and viral partners.

## 100 **2 Materials and methods**

### 101 **2.1 Production and Purification of Recombinant Proteins**

102 PTPN3-PDZ is encoded as an N-terminal glutathione S-transferase (GST) tagged protein in a  
103 pDEST15 expression plasmid. PTPN3-Bidomain and PTPN3-linker-PTP are encoded as Nterminal  
104 6xHis tagged proteins in pET15b expression plasmids. In the three cases, a TEV cleavage site is  
105 inserted between the N-terminal tags and the protein sequences. The vectors were used to transform E.  
106 coli BL21 Star (DE3) star cells (Invitrogen, Carlsbad, CA, USA).

107 PTPN3-PDZ, PTPN3-Bidomain and PTPN3-linker-PTP constructs were expressed and purified as  
108 previously described (Maisonneuve et al., 2014) with minor modifications.

109 Briefly, harvested cells were resuspended in buffer A (50 mM Tris/HCl, pH 7.5, 150 mM NaCl), 2mM  
110  $\beta$ -mercaptoethanol and protease inhibitor cocktail (Roche), and then disrupted in a French press. The  
111 clarified supernatants were loaded onto a GST column (GSTrap HP, GE Healthcare) or a nickel affinity  
112 chromatography column (HiTrap HP, GE healthcare) and washed with the same buffer. The GST tag  
113 was cleaved by overnight incubation at 4°C by TEV protease (1% mol/mol) directly injected into the  
114 column. The eluted fractions containing the protein were pooled and loaded onto a size exclusion  
115 column (HiLoad Superdex 75 pg; GE) equilibrated with buffer A with 0.5 mM Tris(2-  
116 carboxyethyl)phosphine (TCEP). Purified proteins were concentrated using centrifugal filter devices  
117 (Vivaspin, Sartorius). Protein concentration was estimated from its absorbance at 280 nm. Purification

118 of PTPN3-PDZ used for crystallogenesi s was performed as previously reported (Genera et al., 2021).  
119 The peptides, PBM-p38 $\gamma$ , PBM-HBc, PBM-16E6 and PBM-18E6, were synthesized in solid phase  
120 using Fmoc strategy (Proteogenix) and resuspended in H<sub>2</sub>O with pH adjusted.

## 121 2.2 NMR experiments

122 The NMR binding experiments between PTPN3-PDZ and PBM-TACE peptide to measure PTPN3-  
123 PDZ·PBM peptide affinities were performed at 15 °C on a 600-MHz Bruker Avance III HD  
124 spectrometer equipped with a cryoprobe. Briefly, the PBM-TACE peptide (stock solution at 3 mM mM  
125 pH 7.5) was added stepwise in a sample initially containing <sup>15</sup>N-labeled PTPN3-PDZ at a concentration  
126 of 117  $\mu$ M. A series of <sup>1</sup>H, <sup>15</sup>N HSQC spectra was recorded for 11 different titration points with a ratio  
127 PDZ:PBM-TACE (mol:mol) from 1:0 to 1:8.5. The NMR samples for the PTPN3-PDZ was prepared  
128 in buffer A with 0.5 mM TCEP and D<sub>2</sub>O (5% vol:vol). The chemical shift changes were followed with  
129 the CcpNmr Analysis software (27)(Vranken et al., 2005). Average (<sup>1</sup>H, <sup>15</sup>N) chemical shift changes  
130 were calculated as  $\Delta\delta_{av} = [(\Delta\delta_H)^2 + (\Delta\delta_N \times 0.15)^2]^{1/2}$ .

131 The K<sub>D</sub> was obtained by fitting the titration data with a model assuming a 1:1 complex formation and  
132 with nonlinear regression using CcpNMR Analysis software. The (<sup>1</sup>H, <sup>15</sup>N) chemical shift changes  
133 were fitted in function of the ratio ligand/protein using the equation:  $\Delta\delta_{obs} =$   
134  $\Delta\delta_{\infty} \left( \frac{L+P+K_d - \sqrt{(L+P+K_d)^2 - 4LP}}{2P} \right)$ , where  $\Delta\delta_{obs}$  is the average chemical shift changes for each titration  
135 point,  $\Delta\delta_{\infty}$  is the maximal variation of the chemical shift, P is total protein concentration and L is the  
136 total ligand concentration.

137 A pool of 14 peaks with the best fit for each titration were kept to deduce the K<sub>D</sub>, and the errors are  
138 the standard deviations of all the K<sub>D</sub> values fitted from the curves. Signals broaden in the moderate  
139 fast-exchange regime observed with PTPN3-PDZ and the PBM peptide, increasing the experimental  
140 errors on the chemical shift measurements used for the fitting of the K<sub>D</sub>.

## 141 2.3 Crystallization, data collection, and structure determination

142 The PDZ domain-peptide complexes for co-crystallization was generated by mixing PTPN3-PDZ in  
143 20 mM HEPES pH 8, 150 mM NaCl, 0.5 mM TCEP and the peptide at a ratio of 1:2. The PDZ domain  
144 concentrations were at 5 mg/mL and 4.8 mg/mL for the complex with PBM-18E6 and PBM-TACE,  
145 respectively.

146 Crystallization trails were performed in 400 nanoliter sitting-drop vapor diffusion method by using  
147 Mosquito nanolitre-dispensing crystallization robot at 18°C (TTP Labtech, Melbourn, UK) and  
148 following established protocols at the Crystallography Core Facility of Institut Pasteur in Paris, France  
149 (Weber et al., 2019).

150 The best crystals were obtained for the complex with PBM-18E6 in crystallization condition containing  
151 20% w/v PEG 3350, 0.2 M NaI at pH 7, and for the complex with PBM-TACE, the reservoir solution  
152 contained 20% w/v PEG 3350, 0.2 M Na-thiocyanate at pH 7. Crystals were cryo-protected in a 1:1 v/v  
153 mixture of paraffin oil and paratone oil. X-ray diffraction data were collected at a wavelength of 0.979  
154 Å on the beamline PROXIMA-1 at Synchrotron SOLEIL (St. Aubin, France). The data were processed  
155 with XDS (Kabsch, 2010), and the programs Pointless (Evans, 2011) and Aimless (Evans and  
156 Murshudov, 2013) from the CCP4 suite (Winn et al., 2011). The structures were solved by molecular  
157 replacement with PHASER (McCoy, 2007) using as the search model PTPN3-PDZ (PDB ID 6HKS).

158 The locations of the bound peptides were determined from a Fo–Fc difference electron density maps.  
159 Models were rebuilt using COOT (Emsley et al., 2010), and refinement was done with phenix.refine  
160 (Adams et al., 2010). The overall assessment of model quality was performed using MolProbity. The  
161 crystal parameters, data collection statistics, and final refinement statistics are shown in Table 2. All  
162 structural figures were generated with the PyMOL Molecular Graphics System, Version 1.7  
163 (Schrödinger)(Figure 2).

164 The atomic coordinates and structure factors of PTPN3-PDZ domain in complex with PBM-TACE and  
165 PBM-18E6 have been deposited in the Protein Data Bank under accession codes 8CQY and 8OEP,  
166 respectively.

## 167 **2.4 Holdup assay**

168 The holdup assay was conducted against the biotinylated peptide PBM-p38 $\gamma$  (Supplementary Material  
169 1) following previously established protocols (Vincentelli et al., 2015; Duhoo et al., 2019) with some  
170 slight modifications. In summary, we utilized a high-throughput technique to measure the affinities  
171 and specificities of motifs in a library of human PDZ domains, which involved the use of both robotic  
172 and microfluidic methodologies. To achieve this, we expressed 266 PDZ domains fused with the  
173 Maltose Binding Protein (MBP) tag, which constituted 97% of the human PDZome. Bacterial extracts  
174 containing overexpressed PDZ domains were incubated with PBM peptide-coated resins in 96-well  
175 plates, then filtered and evaluated using microfluidic capillary electrophoresis to determine binding  
176 intensities (BIs) in the flowthroughs. The minimal BI threshold value is 0.2 to define a significant  
177 interaction as previously reported (Vincentelli et al., 2015). For PBM-HBc, we used our previously  
178 reported data (Genera et al., 2021). Our holdup data were recently assembled into an open-access  
179 database (<https://profaff.igbmc.science>)(Gogl et al., 2022).

## 180 **2.5 Sequence analysis**

181 For all protein alignments, logo representations were created using the online WebLogo service<sup>357</sup> at  
182 <https://weblogo.berkeley.edu/>. The sequence conservation is shown as a frequency plot. The amino  
183 acids are colored according to their chemical properties: polar amino acids (G,S,T,Y,C,Q,N) are green,  
184 basic (K,R,H) blue, acidic (D,E) red and hydrophobic (A,V,L,I,P,W,F,M) amino acids are black. Letter  
185 width is scaled depending on position occupancy, with reduced width for increasing gap percentages.

186 Protein sequences for PTPN3 (349) and PTPN4 (354) orthologs have been retrieved from the NCBI  
187 gene databank, using one sequence per orthologous gene. Sequences are accessible at :  
188 <https://www.ncbi.nlm.nih.gov/gene/5774/ortholog/?scope=7776&term=PTPN3> and  
189 <https://www.ncbi.nlm.nih.gov/gene/5775/ortholog/?scope=89593&term=PTPN4>. Sequences for the  
190 two proteins orthologs were pooled (703 in total) and aligned using the E-INS-i algorithm from the  
191 MAFFT package (Katoh and Standley, 2013), suitable for multidomain proteins. Positions ungapped  
192 in the human PTPN3 protein sequence (NCBI entry NP\_002820.3; UniprotKB entry P26045) were  
193 manually selected for display (Figure 3A).

194 Protein sequences for the human PDZome were retrieved from the database used for the holdup library  
195 (Vincentelli et al., 2015; Duhoo et al., 2019) and aligned using the G-INS-i algorithm from the MAFFT  
196 package, suitable for compact single domain alignment. Positions ungapped in the human PTPN3  
197 protein sequence were manually selected for display (Figure 3B).

198 Sequences for HBV core (251), HPV16 E6 (1415) and HPV18 E6 (93) proteins have been retrieved  
199 from UniprotKB, respectively accessible at : <https://www.uniprot.org/uniprotkb?query=HBVgp4>,

200 [https://www.uniprot.org/uniprotkb?query=\(protein\\_name:E6\)%20AND%20\(organism\\_id:333760\)](https://www.uniprot.org/uniprotkb?query=(protein_name:E6)%20AND%20(organism_id:333760)),  
201 [https://www.uniprot.org/uniprotkb?query=\(protein\\_name:E6\)%20AND%20\(organism\\_id:333761\)](https://www.uniprot.org/uniprotkb?query=(protein_name:E6)%20AND%20(organism_id:333761)).  
202 Protein sequences for TACE (283) and p38gamma (259) have been retrieved from the NCBI gene  
203 databank, using one sequence per orthologous gene. Sequences are accessible at:

204 <https://www.ncbi.nlm.nih.gov/gene/6868/ortholog/?scope=89593&term=ADAM17> and  
205 <https://www.ncbi.nlm.nih.gov/gene/6300/ortholog/?scope=7776&term=MAPK12>. For each of the 5  
206 forementioned proteins, the last 5 residues were retrieved for display (Figure 4).

207 Sequences from proteins identified by pull-down and mass-spectrometry (Figure 5) were retrieved  
208 from the UniprotKB database. C-terminal PBMs were sorted according to class consensus (class1:  
209 [ST][X][ACVILF]; class2: [VLIFY][X][ACVILF]; class3: [ED][X][ACVILF], where X corresponds  
210 to any residue).

211 Protein sequences for PDZ domains recruited by HBV core (Genera et al., 2021) and p38gamma PBMs  
212 (Supplementary Material 1) in the Holdup experiments were aligned using the G-INS-i algorithm from  
213 the MAFFT package. Positions ungapped in the human PTPN3 protein sequence were manually  
214 selected for display (Figure 6).

215 The analysis of human PBMs composition was performed based on the Swiss-prot databank.

216 All protein sequences for *homo sapiens* were downloaded, resulting in 20402 sequences, reduced to  
217 20374 by removing entries of less than 20 residues.

218 For each sequence, the last 3 residues are considered for sorting according to PBM class consensus  
219 (class1: [ST][X][ACVILF]; class2: [VLIFY][X][ACVILF]; class3: [ED][X][ACVILF], where X  
220 corresponds to any residue) or as non-PBM. For the list of all PBM-containing proteins, the last 5  
221 residues are extracted for the logo representation (Figure S1). The occupancy of residues at each PBM  
222 position were calculated as raw percentages, *i.e.* the number of sequences with a given residue at  
223 a position divided by the total number of considered sequences.

## 224 2.6 Enzymatic assays

225 PTPN3-Bidomain, PTPN3-linker-PTP, PTPN3-shLinker-PTP (short linker, missing 23 residues) and  
226 PTPN3-PDZ (Figure 1). In all experiments, the phosphatase activity was assessed using the synthetic  
227 nonspecific phosphatase substrate p-nitrophenyl phosphate (pNPP), whose hydrolysis into p-  
228 nitrophenol (pNP) can be followed spectrophotometrically at 410 nm. Reactions were performed in  
229 50mM Tris-HCl, pH 7.5, 1 mM MgCl<sub>2</sub>, 150 mM NaCl, 0.5 mM

230 TCEP. The initial reaction rates were measured independently at pH 7.5 and at 25°C. pNPP was  
231 assayed for concentrations ranging from 19µM to 10 mM at an enzyme concentration of 75 nM. The  
232 dephosphorylation reaction followed Michaelis-Menten kinetics and exhibited a substrate inhibition  
233 effect at high concentrations of pNPP. The experimental data was therefore fitted to a corrected  
234 Michaelis-Menten equation to take into consideration this inhibition. Phosphatase activity was  
235 measured by following the hydrolysis of pNPP as previously described (Maisonneuve et al., 2014).  
236 Absorbances were measured continuously at 410 nm for pNP, using a Thermo Scientific UV  
237 spectrometer equilibrated at 25 °C. Initial linear reaction rates were calculated during a 60 second  
238 reaction. The  $k_{cat}$  and  $K_M$  constants were deduced from fitting the Michaelis-Menten equation with the  
239 Prism software.  $K_M$ ,  $k_{cat}$  and  $k_{cat}/K_M$  are listed in table 3. The data are representative of three  
240 independent experiments.

241 A large excess (molar ratio 600:1) of each peptide was incubated with PTPN3-Bidomain for 30' at  
242 25°C, and the initial rates of the dephosphorylation reaction were measured in the same range of pNPP  
243 concentrations.

244 Then, to assess whether the linker that connects the PDZ and PTP domains is required for the catalytic  
245 regulation, we measured at 25°C the catalytic activity at an enzyme concentration of 75 nM and at a  
246 fixed concentration of 2.5 mM pNPP, where the Bidomain and linker-PTP constructs exhibited the  
247 highest initial rate of reaction (Figure 7A). We compared the initial rate for PTPN3-Bidomain, PTPN3-  
248 linker-PTP alone, and for PTPN3-linker-PTP with a large excess PTPN3-PDZ added in *trans* (molar  
249 ratio 80:1) and incubated for 1h at 4°C.

## 250 **2.7 Analytic ultracentrifugation (AUC) experiments**

251 Sedimentation velocity experiments of PTPN3-Bidomain were carried out at 20°C using an analytical  
252 ultracentrifuge (Beckman Coulter Optima AUC) equipped with a AN60-Ti rotor. The protein sample  
253 at 14 µM was centrifuged for 17h at 42000 rpm. Data were analyzed with SEDFIT 15.1 (Schuck, 2000)  
254 using a continuous size distribution c(S) model. The partial specific volume, the viscosity and the  
255 density of the buffer were calculated with SEDNTERP.

## 256 **2.8 Small Angle X-Ray Scattering (SAXS) experiments**

257 To minimize the contribution of small aggregates to the scattering, synchrotron radiation X-ray  
258 scattering data were collected on the SWING beamline at Synchrotron Soleil (France) using the online  
259 HPLC system. SAXS samples were injected into a size exclusion column (superdex 75 increase 5 x  
260 150 Cytiva) using an Agilent High Performance Liquid Chromatography system cooled at 25 °C and  
261 eluted directly into the SAXS flow-through capillary cell at a flow rate of 200 µL·min<sup>-1</sup>. For the  
262 experiments corresponding to PTPN3 bidomain complexed with PBM-p38γ, the column was  
263 equilibrated with buffer containing 40 µM PBM-p38γ. SAXS data were collected online throughout  
264 the whole elution time, with a frame duration of 1s. The first 100 frames collected during the first  
265 minutes of the elution flow were averaged to account for buffer scattering. The 10 frames  
266 corresponding to the top of the elution peak were averaged and were used for data processing after  
267 baseline subtraction (see Supplementary Material 2).

268 The data were analyzed using foxtrot and primus from atsas (Konarev et al., 2003) suite, from which  
269 Guinier was generated. From the corrected scattering curves, the pair distribution functions were  
270 computed using gnom.

271 Models for PTPN3 Bidomain were generated using CORAL from residue 488 to 913 based on the X-  
272 ray structure of the PDZ (PDB id 6T36) and the catalytic domain (PDB id 2B49). The two domains  
273 were rigid. The linker, the N-terminal, and the C-terminal part of the PTPN3 were set in random  
274 conformations. 50 models were generated, and the best model is presented. The model of PTPN3  
275 complexed with PBM-p38γ was generated similarly with the structure of the PDZ complexed with the  
276 PBM.

## 277 **3 Results**

### 278 **3.1 Similar affinities of cellular and viral PDZ-binding motifs for PTPN3-PDZ suggest viral** 279 **mimicking of cellular PBM sequences**

280 We determined the dissociation constant ( $K_D$ ) of PTPN3-PDZ for the PBM-TACE peptide comprising  
281 the last C-terminal 12-residues of TACE and encompassing the PBM (sequence  
282 RQNRVDSKETEC)(Table 1) following the <sup>1</sup>H, <sup>15</sup>N chemical shift perturbations of PTPN3-PDZ NMR  
283 signals in the <sup>1</sup>H-<sup>15</sup>N HSQC spectra as a function of peptide concentration (Figure S2). The PBM-  
284 TACE peptide binds to PTPN3-PDZ with a  $K_D$  value of 30 µM. We previously obtained  $K_D$  values of

285 26  $\mu\text{M}$ , 29  $\mu\text{M}$ , 53  $\mu\text{M}$  and 37  $\mu\text{M}$  for PBM-p38 $\gamma$ , PBM-HBc, PBM-16E6 and PBM-18E6, respectively,  
286 using the same methodology (Table 1). Thus, the PBM-TACE  $K_D$  value is similar to the  $K_D$ s previously  
287 measured for the PBM peptides of other cellular or viral partners (Genera et al., 2019) falling in the  
288 few tenth-of-micromolar range, common for PDZ-PBM interactions.

289 All these PBMs are type 1 PBMs with the canonical consensus sequence S/T-X- $\Phi_{\text{COOH}}$  (where X is  
290 any residue and  $\Phi$  is a hydrophobic residue). Interestingly, the cellular and viral sequences have strong  
291 similarities in their sequences at the C-terminal positions (Table 1). Indeed, an atypical cysteine is  
292 found at the last position (position 0 or P0) for both the viral PBM-HBc and the cellular PBM-TACE,  
293 while common leucine and valine are found for viral HPV PBMs and the cellular p38 $\gamma$ . In addition, we  
294 observed conserved positions in all PBMs with a negative aspartic acid at position -3 (P-3) and a  
295 positive arginine or lysine at P-4. This conservation among the viral and cellular sequences is in  
296 agreement with a viral mimicking of the cellular PBM sequences, allowing the viral proteins to interact  
297 with host PDZ domains with similar affinities to cellular partners, as observed here for PTPN3-PDZ.  
298 This result is consistent with the hypothesis that viral PBM sequences can compete with endogenous  
299 ligands of PTPN3-PDZ, disrupting cellular PDZ/PBM complexes.

### 300 3.2 Crystallographic studies of PTPN3-PDZ and its binding specificities to PBMs

301 To explore the binding specificities of PTPN3-PDZ towards PBMs, we conducted crystallographic  
302 studies of PTPN3-PDZ in complex with PBM-18E6 and PBM-TACE peptides (Table 1). The statistics  
303 for data collection and refinement are provided in Table 2. These structures were compared to our  
304 previously published crystal structures of PTPN3-PDZ in complex with PBM-16E6 (Genera et al.,  
305 2019) and PBM-HBc (Genera et al., 2021).

306 In all cases, the overall PDZ fold of PTPN3-PDZ is highly conserved, and the peptides bind in the  
307 conventional mode as an anti-parallel extension to the  $\beta$ 2-strand (see Figure 2). Compared to our  
308 previous PTPN3-PDZ structure in complex with PBM-16E6 (PDB ID 6HKS)(Figure 2A), all structures  
309 present a very low root mean square deviation (rmsd) ranging from 0.19 Å to 0.30 Å for the backbone  
310 atoms of PTPN3-PDZ, indicating that none of these peptides induce significant conformational  
311 changes in the backbone when binding to PTPN3-PDZ. All the complexes possess the classical  
312 bonding network of class I PDZ/PBM interactions (S/T-X- $\Phi_{\text{COOH}}$ ). The C-terminal residues that exhibit  
313 well-defined electron density maps start from P-5 for PBM-TACE, P-6 for PBMs of HPVs or P-7 for  
314 PBM-HBc until P0 (see peptide sequences in Table 1).

315 The interactions at P0 and P-2 are essential in PDZ/PBM recognition. Position -2 in particular can be  
316 considered as the class determinant for PBMs (Songyang et al., 1997). The binding modes of each  
317 PBM peptide to PTPN3 are shown in Figure 2. As expected, the C-terminal carboxylate in each peptide  
318 forms three H-bonds with the amide nitrogens of F521, G522 and F523 of the “GLGF motif” on  
319 PTPN3-PDZ. The PBM-18E6 valine at P0 (V0) is additionally bonded to the carbonyl of G519 on the  
320  $\alpha$ 1- $\beta$ 1 loop and to the N $\zeta$  of K580 of the  $\alpha$ 2-helix through a molecule of water (Figure 2B). At P-2, the  
321 S or T side chains form H-bonds with the N $\epsilon$ 2 of H572 at the N-terminus of the  $\alpha$ 2-helix of PTPN3-  
322 PDZ, which is conserved in class I PDZ domains. These interactions found in these two key positions,  
323 P0 and P-2, correspond to the expected bonding pattern of a class I PBM for all the PBMs tested.

324 An interesting feature of PBM-TACE and PBM-HBc (Genera et al., 2021) is the presence of the C-  
325 terminal cysteine at P0 (Figure 2C,D). The carboxylate-binding pocket at the top of the peptide-binding  
326 groove of PDZ domains is lined with hydrophobic side chains (F521, F523, L525, I579), which  
327 determines the preference for peptides with C-terminal hydrophobic residue (position P0)(Songyang  
328 et al., 1997) (Figure S3A). We observed that in the complexes of PTPN3-PDZ with PBM-TACE and



329 PBM-HBc, the cysteine side chain is oriented towards the interior of the peptide-binding groove,  
330 without making any contacts with the hydrophobic side chains that line this pocket (Figure S3B). The  
331 cysteine side chain is short enough to fit within the binding pocket and occupies the same position as  
332 the conventional leucine side chain at P0 of HPV16 E6 (Figure 2A).

333 At P-1, the Q side chain of PBM-16E6 and PBM-HBc and the E side chain of PBM-TACE form a H-  
334 bond with a water molecule that is in turn bonded to the N $\delta$ 2 of N524 in the  $\beta$ 2-strand of PTPN3-PDZ.  
335 In PBM-18E6, on the contrary, the side chain does not contact the PDZ domain (Figure 2). This  
336 position is not considered as a significant determinant for PDZ/PBM interaction and is not specified in  
337 any of the three main classes of PDZ domains. In the case of PTPN3, sequence analysis of its known  
338 partners suggests a bias towards Q or E residues with rather long and polar side chains at P-1 (Table  
339 1). In line with this, N524 is strictly conserved in PTPN3 and PTPN4 orthologs (Figure 3A), while  
340 short polar residues S or T are more often found in this position in the full human library of all the 273  
341 known PDZ domains (PDZome)(Figure 3B). The short side chains of S and T could probably not  
342 establish bonds with Q or E at P-1. Moreover, N524 is also H-bonded to P-3 of the PBM which also  
343 requires a long side chain. Indeed, in all solved structures of complexes between PTPN3-PDZ and viral  
344 and cellular PBMs (PBM-HBc, PBM-16E6 and PBM-18E6 and PBM-TACE), N524 interacts with the  
345 E side chain at P-3 (Figure 2). This interaction is also observed between PTPN4-PDZ and the PBMs  
346 that contain E at P-3, such as the ones of p38 $\gamma$  (Maisonneuve et al., 2016), the attenuated rabies virus  
347 glycoprotein, and the ionotropic glutamate receptor GluN2A (Babault et al., 2011). Interestingly, the  
348 Q and E at P-1 and the E at P-3 are strongly conserved in PBMs (Figure 4). Thus, the conservation of  
349 N524 could originate from these two interactions with the -3 and the -1 residues of the PBM.

### 350 **3.3 Exploring the impact of P-3 and P-4 on PDZ ligand selection within the NT5 subfamily**

351 We propose that P-3 and P-4 have a significant influence on the PDZ ligand selection by the NT5  
352 phosphatase subfamily which encompasses PTPN3 and PTPN4. The E at P-3 and R or K at P-4 are  
353 strictly or strongly conserved in ligands of PTPN3-PDZ (PBM-HBc, PBM-16E6 and PBM-18E6 and  
354 PBM-TACE, PBM-p38 $\gamma$ )(Figure 4). Similarly, the most affine ligands of PTPN4-PDZ also feature an  
355 E at P-3 (Babault et al., 2011). In all our PTPN3-PDZ/peptide complexes and in the previously reported  
356 PTPN4-PDZ/peptide complexes (Babault et al., 2011; Maisonneuve et al., 2016), the E side chain at  
357 P-3 forms a bifurcated H-bond with the amide nitrogen of N524 and with the side chain hydroxyl of  
358 S538 in the  $\beta$ 3 strand (Figure 2). Like N524, S538 is strictly conserved in PTPN3 and PTPN4 orthologs  
359 (Figure 3A), while this position is conserved only in about 20% of cases in the human PDZome with  
360 also K, T and A, commonly found (Figure 3B). In addition, the aliphatic carbon chain of E at P-3 is  
361 well positioned to establish hydrophobic contacts with the carbon side chain of K526, which  
362 contributes to its stabilization. In PTPN3 and PTPN4 orthologs, a K residue is conserved at position  
363 526, while in the PDZome, R and V are more frequently found, followed by S, A, and K (Figure 3B).  
364 In agreement with this, similar hydrophobic contacts have been observed in the complexes of PTPN4-  
365 PDZ with the PBMs of p38 $\gamma$ , GluN2A, and the attenuated rabies virus glycoprotein (Cyto13-  
366 att)(Babault et al., 2011; Maisonneuve et al., 2016)(Figure S4), suggesting that these contacts can also  
367 influence the PDZ ligand selection of the NT5 subfamily.

368 In all four PBMs (PBM-HBc, PBM-16E6 and PBM-18E6 and PBM-TACE), the long and positively  
369 charged side chains of R or K at P-4 form ionic bonds with the carboxylate oxygens of D573 at the N-  
370 terminus of the  $\alpha$ 2-helix in PTPN3-PDZ (Figure 2). This bond is also found in our previous structure  
371 of PTPN4-PDZ complexed to PBM-p38 $\gamma$  where a K is conserved at P-4 (Maisonneuve et al., 2016).  
372 PTPN3 and PTPN4 orthologs present a conserved D at position 573 (Figure 3A). In the PDZome, an  
373 E is most frequently found in this position (about 25%), followed by D, A, S, Q, and K (Figure 3B).

374 Both E and D should be able to establish ionic bonds with a positively charged residue at P-4 of the  
375 PBM. We previously identified the main structural elements of PBM binding to PTPN4-PDZ and  
376 optimized the sequence of a synthetic peptide of higher affinity. P-3 and P-4 of the optimized PBM  
377 were shown to be critical with an E in P-3 forming H-bonds with the conserved S538 (S545 in PTPN4)  
378 and the R in P-4 forming H-bond with D573 (D580 in PTPN4)(Maisonneuve et al., 2016). However,  
379 G and I at P-4 in the two PTPN4-PDZ ligands, the attenuated rabies virus G protein and the glutamate  
380 receptor GluN2A, respectively, bind to PTPN4-PDZ without providing adequate side-chains to interact  
381 with D573, and the affinity of the interaction decreases accordingly (Babault et al., 2011)(Figure S4).  
382 Thus, D573 contributes to the selectivity of the NT5 family by improving affinity for PBMs with a R  
383 or K at P-4 but is not a determinant of specificity since other residues are allowed at this position.

384 In all the PTPN3-PDZ/peptide complexes, the amide nitrogen of R or K at P-4 forms a H-bond with  
385 the N $\epsilon$ 2 of the Q531 side chain (loop  $\beta$ 2- $\beta$ 3). Q531 is strongly conserved in PTPN3 and PTPN4  
386 orthologs (Figure 3A), but the conservation of residue at this position is low in the PDZome; S, N, G,  
387 and H, are all found with higher frequency than Q (Figure 3B). However, although these interactions  
388 with Q531 likely contribute to the affinity of the complexes, they are not involved in NT5 subfamily  
389 ligand selectivity since they involve the backbone of the PBM, and thus any residue (except proline)  
390 could fill the position. This interaction is also observed in the complexes of PTPN4-PDZ with the  
391 attenuated rabies virus G protein and GluN2A, which have G at P-4 and I at P-4, respectively (Babault  
392 et al., 2011)(Figure S4). These residues do not establish ionic contacts with the conserved D (D573 in  
393 PTPN3) as do R and K at P-4 in PTPN3, but both still form H-bonds with Q531.

394 Lastly, the side chain of K526 from the  $\beta$ 2-strand is pointed towards PBM-HBc and PBM-TACE,  
395 allowing its N $\zeta$  to form H-bonds with the carbonyl oxygen of the K or R at P-4 and with the side chain  
396 hydroxyl of S at P-5, contributing to the stability of the complex. In the two other PTPN3 partners,  
397 there is R instead of S at P-5. Forming a H-bond with the short, polar side chain of S could favor the  
398 K526 side chain to orient towards the peptide, while in the other cases it adopts an extended  
399 conformation to maximize the hydrophobic contacts with the C $\beta$ -C $\gamma$  carbon chain of E at P-3.

400 In conclusion, PBM-containing partners with E at P-3 are favored because of their capacity to form H-  
401 bonds with the conserved N524 and S538 of  $\beta$ 2 and  $\beta$ 3 strands, respectively, as well as hydrophobic  
402 contacts with the aliphatic carbon side chain of K526 of  $\beta$ 2 strand. Additionally, partners with R or K  
403 at P-4 can form ionic bonds with the conserved D573 from  $\alpha$ 2-helix. These interactions likely  
404 contribute to the affinity of the complex, which will favor their binding over other potential partners,  
405 but they are not mandatory for the binding to occur.

### 406 **3.4 Sequence insights of PTPN3-PDZ captured PBMs from cell Lysates**

407 We previously performed pull-down experiments using PTPN3-PDZ as bait to fish new cellular PBM-  
408 containing partners in HeLa S3 cell lysates (Genera et al., 2021). From 326 proteins bound exclusively  
409 to GST-PTPN3-PDZ and absent from GST controls and identified by LC-MS/MS, 83 encode for a C-  
410 terminal PBM and are potential PTPN3 interactants through PDZ/PBM interactions (Supplementary  
411 Material 3). We used these data to gain insights on the consensus sequence of PBMs preferentially  
412 bound in this cell lysate context.

413 Among the 83 PBM-containing partners, we identified 34 of class I (S/T-X- $\Phi_{\text{COOH}}$ ), 33 of class II ( $\Phi$ -  
414 X- $\Phi_{\text{COOH}}$ ), and 16 of class III (D/E-X- $\Phi_{\text{COOH}}$ ) (see Supplementary Material 4, 5 and 6 respectively).  
415 We performed a sequence conservation analysis on them from P0 to P-4 (Figure 5). The preferred  
416 residues of PTPN3-PDZ at position 0 are L, F and V with 37, 13 and 13 occurrences, respectively.  
417 Together, these account for 63 over the 83 binders with L being predominant. We found 2 proteins

418 with a C at P0, both encompassing a class I PBM: NADH-ubiquinone oxidoreductase 75 kDa subunit  
419 mitochondrial (Uniprot P28331) and PCI domain-containing protein 2 (Uniprot Q5JVF3). For the class  
420 II PBMs, we found more often L, A, and F, at P0 with 13, 9, and 7 occurrences over 33 respectively  
421 partners. P0 of class III displays mainly a L (11 occurrences over 16).

422 PTPN3-PDZ is classified as a class I PDZ domain. Accordingly, S and T residues, representative of  
423 this class at P-2 of the partner PBMs, are the most abundant in all PBMs bound in the cell lysate (Figure  
424 5). Interestingly, partners with PBMs of classes II and III are also abundantly fished, with D being the  
425 next most abundant residue at P-2 after T and S (Figure 5). Several PDZ domains were previously  
426 reported to bind both class I and class II PBMs (Kalyoncu et al., 2010). The preferred residues at P-2  
427 for the class II partners are F, L, and Y.

428 At P-1, PTPN3-PDZ shows a slight tendency to bind PBMs with E or S, with S prevalent for class I  
429 PBMs and E for class II and III PBMs (Figure 5). In our crystal structures, the Q or E found in this  
430 position is bonded to N524 through a molecule of water (Figure 2). A serine would be able to bond  
431 directly to N524 thanks to its shorter side chain, which could explain why this residue would be favored  
432 in this position.

433 At P-3, a preference for E is observed in all PBMs (Figure 5). In fact, E is selected preferentially in  
434 classes I and II and not in class III. In class I PBMs, E is most abundant (more than 40%), while S, D  
435 and G are also found at P-3 at a 10-20% frequency. D should be able to form a H-bond with S538 in a  
436 similar way to E in our structures as E and D have side chains with similar chemical properties. S and  
437 G cannot form this bond and thus do not contribute to the interaction. Finally, the conservation at P-4  
438 is very low with no preferential residue observed at this position.

439 Altogether, these data are informative about the PBMs sequences preferentially fished from a cell  
440 lysate by PTPN3-PDZ and define a preferred target motif of PTPN3-PDZ in this context.

### 441 **3.5 Investigation of specificity profiles of PBMs of p38 $\gamma$ and Hbc recognized by PTPN3-PDZ** 442 **against the human PDZome**

443 Then, we investigated the specificity profiles of the PBMs of the PTPN3-PDZ ligands p38 $\gamma$  and of Hbc  
444 against the full human PDZome (library that contains all the known human PDZ domains)(Duhoo et  
445 al., 2019). PBM-Hbc and PBM-p38 $\gamma$  harbor from P-5 to P0 the sequences -SRESQC<sub>COOH</sub> and -  
446 SKETPL<sub>COOH</sub>, respectively. P-5 is conserved with a serine in both cases, P-4 with a lysine or arginine,  
447 and P-3 with a glutamate. We used the holdup assay, an *in vitro* automated high-throughput  
448 chromatography assay that exhibits high sensitivity for low-to-medium affinity PDZ/PBM pairs and  
449 provides affinity-based ranking of identified PDZ domains matching a profile of specificity. 12-mer  
450 peptides encompassing the protein C-terminal PBM sequences linked to a biotinyl group are used as  
451 baits to quantify the interaction between PBMs and the library of human PDZ domains expressed in  
452 *Escherichia coli* (Duhoo et al., 2019).

453 We generated a PDZome-binding profile of PBM-p38 $\gamma$ . Mean values of binding intensities (BI) ranked  
454 based on affinity are reported in Supplementary Material 1. The highest BI values indicate the PDZ  
455 domains recognized with the best affinities by the peptides used as bait. 28 PDZ domains exhibited  
456 significant binding with BI values greater than 0.2, a previously defined strict threshold (Vincentelli et  
457 al., 2015). In recent work we established the PDZome-binding profile of PBM-Hbc with 28 PDZ  
458 domains also identified as significant binders (Genera et al., 2021). Thus, this similar number of PDZ  
459 domains recognized by the two PBMS of class I represents about 10% of the human PDZome. PTPN3-

460 PDZ has BI values of 0.52 and 0.45 for PBM-p38 $\gamma$  and PBM-HBc respectively, while PTPN4-PDZ  
461 has BI values of 0.60 and 0.58 for the two peptides. This is in agreement with the similar affinities  
462 reported previously (Maisonneuve et al., 2016; Genera et al., 2019).

463 We compared the sequence alignments of PDZ domains recruited by p38 $\gamma$  and HBc PBMs (Figure 6)  
464 to the full human PDZome (Figure 3B). We focused on key positions for PDZ/PBM interactions. As  
465 expected, the “GLGF motif” at position 520-523 (numbering of PTPN3) in interaction with the  
466 hydrophobic residue at P0 of all PBMs is conserved as a signature of PDZ domains in the PDZome  
467 and in the pool of PDZ domains recruited by PBM-p38 $\gamma$  (Figure 6A) and by PBM-HBc (Figure 6B).  
468 H572 is almost the only residue found at this position with the class I PTPN3’s PBMs PDZ-binding  
469 profiles, canonically allowing the interaction with S or T at P-2. N524 is strictly conserved in PTPN3  
470 and PTPN4 orthologs and is also enriched at this position following S in the pools of PDZ domains  
471 recruited by PBM-p38 $\gamma$  and PBM-HBc (Figure 6) compared to the whole PDZome where S or T are  
472 the most abundant residues (Figure 3B). This is likely related to the H-bond of N524 to E at P-3 found  
473 in all reported ligands of PTPN3-PDZ (Figure 4). Similarly, S538 H-bonded to E side chain at P-3 is  
474 also favored in the subsets of PDZ domains recruited by PBM-p38 $\gamma$  and PBM-HBc compared to the  
475 entire PDZome, despite the good conservation of a serine at this position (Figure 3B). The R or K at  
476 P-4 form ionic bonds with D573. D and E are preferred at this position in agreement with their equal  
477 ability to form the ionic bond (Figure 6). In the PDZome, E and D are also abundant at this position  
478 (Figure 3B). These results agree with a tendency that position -3 and possibly -4 of PTPN3’s PBMs  
479 favor specific residues at certain positions in PDZ domains in agreement with the interactions observed  
480 in the X-ray structures. These likely contribute to the affinity of the complex and favors the binding to  
481 the PDZ domains, as observed with the screening of the human PDZome library.

### 482 **3.6 Investigation of the regulatory elements controlling the catalytic activity of PTPN3**

483 While it is demonstrated that the PDZ domains of PTPN3 and PTPN4 regulates their catalytic activities  
484 (Chen et al., 2014; Maisonneuve et al., 2014), the regulatory mechanisms remain poorly understood in  
485 PTPN3. Here, we investigated the effects of the PDZ domain, the PBM binding, and the linker  
486 connecting the PDZ to PTP (residues 598-628), on the phosphatase activity. We used four constructs  
487 of PTPN3: PTPN3-Bidomain, PTPN3-Linker-PTP, PTPN3-shLinker-PTP (short linker, missing 23  
488 residues) and PTPN3-PDZ (Figure 1). In all experiments, the phosphatase activity was assessed using  
489 p-nitrophenyl phosphate (pNPP).

490 We measured and compared the kinetic parameters, the Michaelis constant ( $K_M$ ), the turnover number  
491 ( $k_{cat}$ ) and the catalytic efficiency ( $k_{cat}/K_M$ ), of the dephosphorylation reaction catalyzed by PTPN3-  
492 Bidomain and PTPN3-linker-PTP (Figure 7A)(Table 3). The  $k_{cat}$  of PTPN3-Bidomain is twice lower  
493 than the one of PTPN3-linker-PTP ( $1.5 \pm 0.1 \text{ s}^{-1}$  vs  $3.0 \pm 0.1 \text{ s}^{-1}$ ), whereas the  $K_M$  values are similar.  
494 The PDZ domain inhibits the catalytic activity of PTPN3 as previously reported (Chen et al., 2014).

495 To assess whether the PBM binding to the PDZ domain releases the catalytic inhibition as observed  
496 for PTPN4 (Maisonneuve et al., 2014), we added the PBM peptides of the PTPN3 cellular partners,  
497 PBM-TACE and PBM-p38 $\gamma$ , and the viral peptides PBM-16E6, PBM-HBc, in large excess (molar ratio  
498 500:1) to PTPN3-Bidomain (Figure 7A)(Table 3). For all peptides, a 2-fold decrease in  $k_{cat}$  compared  
499 to PTPN3-linker-PTP is measured, as in the unbound Bidomain, while the  $K_M$  remained unaffected  
500 (Table 3). Thus, we concluded that the PBM binding has no effect on PTPN3 catalytic activity in our  
501 conditions. Accordingly, the specificity constants ( $k_{cat}/K_M$ ) of the complexed Bidomain are in the  
502 same range in comparison with the values of PTPN3-Bidomain (Table 3). Altogether, these data  
503 confirm the existence of a PDZ-mediated inhibited state of PTPN3 in the Bidomain construct as

504 reported for PTPN4 (Maisonneuve et al., 2014). However, the binding of PBM ligands of either cellular  
505 or viral origin does not affect the PTPN3 regulation of the PTP activity by the PDZ domain in the  
506 conditions assayed while we previously reported a partial release of the PTPN4 catalytic inhibition  
507 upon PBM binding in similar conditions (Maisonneuve et al., 2014).

508 Then, we assessed whether the linker that connects the PDZ and PTP domains is required for the  
509 catalytic regulation as observed for PTPN4 (Caillet-Saguy et al., 2017). We measured the catalytic  
510 activity at a fixed concentration of 2.5 mM pNPP, where the Bidomain and linker-PTP constructs  
511 exhibited the highest initial rates of reaction (Figure 7A). We compared the initial rates for PTPN3-  
512 Bidomain, for PTPN3-linker-PTP alone, and for PTPN3-linker-PTP with a large excess of PTPN3-  
513 PDZ added in *trans* (molar ratio 80:1). We observed similar initial reaction rates for PTPN3-Linker-  
514 PTP with and without PTPN3-PDZ added in *trans* (Figure 7B) whereas, as expected, PTPN3-Bidomain  
515 presents a significant lower initial rate. These results indicate that the PDZ-mediated inhibition on  
516 PTPN3 catalytic activity requires that the two domains are covalently linked. Additionally, we  
517 observed that the PTPN3-shLinker-PTP construct, in which the linker lacks the 23 N-terminal residues  
518 (Figure 1), has the same catalytic activity as PTPN3-Linker-PTP, with the full-length linker (Figure  
519 7A)(Table 3). This indicates that the linker alone, freely exposed at the N-terminal has no effect on the  
520 catalytic activity. Thus, the PTPN3 regulatory mechanism is *cis*-acting and requires the PDZ domain  
521 covalently linked to the PTP domain.

### 522 3.7 Insights of PTPN3 Bidomain in solution from AUC and SAXS experiments

523 We conducted AUC and SAXS experiments on the PTPN3 Bidomain to investigate its integrity,  
524 oligomeric state, and shape both free and complexed with a PBM in solution. AUC data of PTPN3-  
525 Bidomain highlighted a main species at 2.8S with a frictional ratio of 1.6, corresponding to an  
526 elongated monomer (Table 4, Figure 8A). In agreement with the AUC experiments, the SAXS  
527 experiments on the Bidomain alone or complexed to PBM-p38 $\gamma$  showed that the free Bidomain behaves  
528 as a monodisperse distribution of monomers in solution (Table 4)(Figure 8B,C, D). The estimated  
529 molecular mass of free Bidomain derived from the extrapolated intensity  $I(0)$  at the origin is consistent  
530 with the theoretical value of 52.5 kDa. The maximum distance ( $D_{max}$ ) of the protein and the radius of  
531 gyration ( $R_g$ ) derived from the electron pair distance distribution function  $P(r)$  (Figure 8C) are similar  
532 for the Bidomain free and complexed with PBM-p38 $\gamma$ , indicating that the PBM binding does not alter  
533 the overall shape of the Bidomain. Indeed, the  $D_{max}$  and  $R_g$  values are respectively 133 Å and 33 Å  
534 for Bidomain alone and 132 Å and 34 Å for Bidomain complexed to PBM-p38 $\gamma$  (Table 4). These results  
535 are consistent with the values measured for PTPN4 (Maisonneuve et al., 2014).

536 We used the SAXS intensity profile to model the 3D arrangement of both domains using the known  
537 structures of the PDZ domain and the catalytic domain (Figure 8E). The models were comparable with  
538 and without the ligand, illustrating that the PBM binding does not affect the overall arrangement of  
539 both domains of the Bidomain in solution that remain extended in solution in agreement with the  
540 frictional ratio measured.

## 541 4 Discussion

542 Several viral and cellular proteins target the PDZ domain of PTPN3 through PBMs, potentially  
543 affecting the function of PTPN3.

544 We focused on studying the molecular basis of the selectivity of PTPN3 recognition for such short and  
545 unstructured PBMs. We characterized the determinants of PDZ ligand recognition of PTPN3 by  
546 solving the crystal structures of PTPN3-PDZ complexed to PBM peptides derived from viral and

547 cellular PTPN3 partners. Indeed, we provided two structures of PTPN3-PDZ in complex with the  
548 PBMs of HPV18 and TACE. We compared them with our previous reported structures of PTPN3-PDZ  
549 in complex with viral PBMs from HPV16 and HBV (Genera et al., 2019, 2021). We found that all  
550 these PBMs establish a similar binding pattern involving conserved residues in the PDZ domains of  
551 the two homologs PTPN3 and PTPN4, whereas these residues are less often conserved in the PDZome.  
552 We propose that they could therefore represent determinants of the sequence preference of PBM ligand  
553 for the NT5 phosphatase subfamily.

554 Interestingly, the binding of PBMs exposing a C-terminal cysteine has only been reported in a handful  
555 of cases, many of which bind to the PDZ domain of GIPC1, interacting with the PBMs of Hbc  
556 (Razanskas and Sasnauskas, 2010), the lutropinchoriogonadotropic hormone receptor (Hirakawa et al.,  
557 2003), the complement component C1q receptor (Bohlson et al., 2005), the insulin-like growth factor  
558 1 receptor (Ligensa et al., 2001), and the dopamine 2 and 3 receptors. These latter share the atypical  
559 C-terminal sequence -KILHC<sub>COOH</sub> (Jeanneteau et al., 2004). Other PDZ domains, MAGI-1 PDZ5, the  
560 Scrib and PDLIM-4 PDZ domains, bind also to PBM with a C-terminal cysteine (Cuppen et al., 2000;  
561 Petit et al., 2005; Chastre et al., 2009). There is a lack of structural data on complexes involving this  
562 type of PBM. To our knowledge, only two structures are available: the one of PDZK1 PDZ1 domain  
563 complexed with the C-terminal PBM of the prostacyclin receptor (-ACSLC<sub>COOH</sub>) (Birrane et al., 2013)  
564 and the one of GRIP1 PDZ6 domain complexed to the liprin- $\alpha$  PBM (-RTYSC<sub>COOH</sub>) (Im et al., 2003).  
565 We observed that the cysteine side chain has the same orientation for GRIP1 PDZ6, where the cysteine  
566 can be accommodated towards the interior of the hydrophobic carboxylate-binding pocket despite the  
567 polar character of the thiol group. It is widely reported that the hydrophobic character of the side chains  
568 that compose the carboxylate binding-pocket imposes a specificity requirement for PBMs containing  
569 hydrophobic residues in the C-terminal position (Sheng and Sala, 2001). The preference of some  
570 hydrophobic residues over others at P0 has been attributed to variations in the size and the geometry  
571 of the hydrophobic carboxylate-binding pocket (Songyang et al., 1997). However, the selectivity at P0  
572 is not highly stringent as observed for PTPN3, whose PDZ domain can accommodate different  
573 hydrophobic residues at P0. Nonetheless, it is remarkable that both GIPC1 and PTPN3 have multiple  
574 C-terminal cysteine PBM partners, while this residue is not frequently found at P0 (less than 8.5% in  
575 all C-terminal human PBMs; Figure S1; Supplementary Materials 7 and 8). Interestingly, the PBM of  
576 RGS-GAIP containing an alanine at P0 (13.8% in all C-terminal human PBMs) was reported to interact  
577 with the PDZ of GIPC1 (De Vries et al., 1998). It is not surprising that the PDZ of GIPC can  
578 accommodate an alanine since both alanine and cysteine are of similar size.

579 We used proteomics data to explore the sequence consensus of the cellular partners bound to PTPN3-  
580 PDZ, highlighting conserved motifs consistent with the observations derived from the crystal  
581 structures. Some of the conserved positions in PTPN3 and PTPN4 PDZ domains mediate contacts  
582 beyond the canonical 3-residue PBM that are not required for the interactions to occur, but possibly  
583 favor the selection of some PBM partners over others by increasing their interaction affinities. PDZ  
584 domains are promiscuous protein-protein interaction modules that bind to their partners with low-to-  
585 medium affinities (1-100  $\mu$ M), which is related to the transient nature of signaling interactions. The  
586 specific polar bonds and hydrophobic contacts that the preferred PTPN3 ligands establish via their  
587 positions -3 and -4 are likely to enhance their binding over other potential PBM-containing partners.  
588 To go further on the selectivity of PTPN3-PDZ, we reported the PBM sequence analysis on the  
589 interactome of PTPN3-PDZ. We documented the PBMs sequences that were selectively captured from  
590 a cell lysate by PTPN3-PDZ and identified a motif that is favored by PTPN3-PDZ in this context with  
591 E or S at P-1, and a preference for E at P-3 (Figure 5). No preferential residue at P-4 was observed.  
592 However, knowing that using the pull-down methodology we fished full-length proteins, so we cannot  
593 exclude that the interactions occur through a different interaction motif, for example via internal PBMs,

594 that we cannot identify. Additionally, in a growing number of complexed PDZ domain structures (Kang  
595 et al., 2003; Sugi et al., 2007; Elkins et al., 2010), class II PBMs peptides are inserted perpendicular to  
596 the PDZ domain, with only position 0 and sometimes position -1 interacting with the PDZ domain.  
597 Thus, it is possible that class II PBMs interact with PTPN3-PDZ through a non-canonical binding  
598 mode. Although it is possible that this perpendicular binding is solely an artifact of the crystal packing,  
599 the observation of this binding mode by NMR for the autoinhibited X11 $\alpha$  PDZ1 domain (Long et al.,  
600 2005) suggests that this type of non-canonical binding could be relevant in solution.

601 PDZ domains are a common structural domain found in many proteins and play a crucial role in  
602 mediating protein-protein interactions. They are often located in conjunction with other catalytic or  
603 non-catalytic domains and contribute to the overall function and regulation of the protein. It is likely  
604 that a further degree of selectivity is achieved thanks to the spatial segregation of the protein by the  
605 PTPN3 FERM domain, which targets the phosphatase to the interface of the membrane and the  
606 cytoskeleton, promoting interaction with certain ligands or substrates over others. This is supported by  
607 the observation that both the FERM and PTP domains of PTPN3 are required for attenuation of HBV  
608 genome expression (Hsu et al., 2007). Interestingly, two of the three isoforms of PTPN3 that have been  
609 described are likely to lack this spatial segregation due to their truncated FERM domains. These  
610 isoforms are likely to be more active than full-length PTPN3, as suggested by *in vitro* limited  
611 proteolysis studies (Zhang et al., 1995). Unfortunately, to the best of our knowledge, there is currently  
612 no data on the subcellular location or the physiological relevance of these isoforms. One can only  
613 hypothesize about their potential role, and the relevance of their PDZ domains for selecting substrates  
614 or anchoring these enzymes to signaling complexes. PTPN3, for example is able to specifically  
615 dephosphorylate the MAPK p38 $\gamma$  thanks to the recognition by its PDZ domain of the C-terminal PBM  
616 of p38 $\gamma$  (Hou et al., 2010). There is an increasing awareness that non-catalytic scaffold domains can  
617 perform direct regulatory functions on the catalytic domain to which they are linked, exceeding their  
618 established roles as inert binding domains.

619 In this work, we performed and analyzed the kinetics of the phosphatase activity of PTPN3 in the  
620 context of the isolated PTP domain and the PDZ-PTP bidomain construct. The PDZ domain inhibits  
621 the activity of the adjacent PTP domain by decreasing the turnover number, without affecting the  
622 affinity for the substrate. This indicates that the PDZ domain is not blocking the accessibility of the  
623 phosphatase substrate to the PTP active site. Therefore, the inhibition is non-competitive, as found for  
624 PTPN4 (Maisonneuve et al., 2014). We were interested in exploring whether PTPN3 features a similar  
625 allosteric regulatory mechanism as PTPN4. We showed that the linker of PTPN3 is necessary for the  
626 inhibition as the one of PTPN4 (Maisonneuve et al., 2014; Caillet-Saguy et al., 2017). The binding of  
627 a PBM to PTPN4 releases the inhibition whereas the PBM binding to PTPN3-PDZ does not affect the  
628 catalytic regulation.

629 PTPN3 and PTPN4 share 51% of global sequence identity, but this rises to 71% for their PDZ domains  
630 and 61% for their catalytic domains. We have previously shown that a conserved hydrophobic FQYI  
631 sequence (residues 620-623 in PTPN4) in the PDZ-PTP linker in PTPN4 is implicated in the regulation  
632 (Caillet-Saguy et al., 2017; Spill et al., 2021). However, these residues at these positions are not  
633 strongly conserved between PTPN3 and PTPN4 (Figure S5). We can hypothesize that this patch is  
634 strictly conserved in orthologous PTPN4 (Figure S5C) to allow the regulation upon PBM binding. The  
635 linker (34-residue long) in PTPN3 is predicted mostly unstructured by AlphaFold  
636 (<https://alphafold.ebi.ac.uk/entry/P26045>) (Jumper et al., 2021; Varadi et al., 2022) as the one of  
637 PTPN4 (<https://alphafold.ebi.ac.uk/entry/P29074>) which was experimentally validated by NMR in  
638 solution (Maisonneuve et al., 2014; Caillet-Saguy et al., 2017). However, the linker of PTPN4 is yet  
639 resistant to proteolysis, which could support an interaction, most likely transient, with the PTP domain,

640 as previously proposed (Caillet-Saguy et al., 2017; Spill et al., 2021). On the contrary, the linker of  
641 PTPN3-Bidomain is sensitive to *in vitro* proteolysis even in the presence of protease inhibitors (Figure  
642 S6), indicating that it is most likely predominantly exposed and possibly having little or no interaction  
643 with the PTP domain. Multidomain proteins frequently employ intrinsically disordered regions for the  
644 purpose of allosteric regulation (Huang et al., 2020). Linkers between domains have been shown to  
645 enhance the local concentration of domains and enable allosteric regulation of weakly interacting  
646 partners, resulting in a rather complex allosteric mechanism and novel protein behavior (Huang et al.,  
647 2020). NMR mapping of the chemical shift changes that occur in PTPN3-PDZ and PTPN4-PDZ upon  
648 ligand binding showed long-range structural and dynamics perturbations (Babault et al., 2011; Genera  
649 et al., 2019). Studying the dynamics of free and PBM-bound PTPN3-Bidomain by NMR would provide  
650 information about any structural rearrangements that might occur upon PDZ ligand binding.  
651 Unfortunately, the proteolysis of the linker prevented us to record usable HSQC spectra. A well-  
652 documented case is the regulation of the catalytic activity of the tyrosine phosphatase SHP-2 by its two  
653 SH2 adjacent domains (Hof et al., 1998). The WPD loop, which is located near the active site of SHP-  
654 2, contains a conserved aspartic acid residue that plays a critical role in the dephosphorylation catalytic  
655 activity. The conformational changes of the WPD loop are also important for substrate recognition and  
656 catalysis. The unbound N-terminal SH2 domain of SHP-2 interacts with the phosphatase domain,  
657 sterically blocking the active site in an open but inactive conformation, preventing the closure of the  
658 WPD loop resulting in competitive inhibition. The binding of a phosphoprotein ligand to the SH2  
659 domain triggers allosteric conformational rearrangements that prevent binding of the complexed SH2  
660 to the PTP domain, releasing the inhibition. The SH2 domain thus works as an allosteric molecular  
661 switch. Similarly, the PDZ domains of PTPN4 and PTPN3 lock the phosphatase domain in an auto-  
662 inhibited conformation, and the catalytically active state is restored upon binding of a PBM for PTPN4  
663 (Maisonneuve et al., 2014) but not for PTPN3. Both the non-competitive inhibition and release of  
664 inhibition processes occur through long-range intramolecular allosteric mechanisms that require the  
665 covalent binding of the two domains. A modulation of the WPD loop through the linker was recently  
666 proposed for the PTPN4 inhibition (Spill et al., 2021). We also hypothesize such molecular mechanism  
667 for PTPN3 and suggest that the variability of the hydrophobic patch observed in the linker for PTPN3  
668 (Figure S5B) could explain the absence of release of inhibition by the PBM.

## 669 **5 Conflict of Interest**

670 The authors declare that the research was conducted in the absence of any commercial or financial  
671 relationships that could be construed as a potential conflict of interest.

## 672 **6 Author Contributions**

673 MG and CCS contributed to the conception and design of the study. MG and BR performed and  
674 analyzed the AUC and SAXS experiments. MG, AC and CCS performed and analyzed the NMR  
675 experiments. MG, BCC and CCS performed sequence analysis. MG, AM, AH, CCS performed and  
676 analyzed the X-ray crystallography experiments. MG and AC performed and analyzed the kinetics  
677 experiments. MG and CCS performed and analyzed the holdup experiment. JC contributed to the  
678 cloning of constructs. MG and AC contributed to protein production. MG, BCC, NW, and CCS wrote  
679 the first draft of the manuscript. All authors contributed to manuscript revision, read, and approved the  
680 submitted version.

## 681 **7 Funding**

682 The project has received fundings from ANRS (ANRS 22167 AP2021-2 CAILLET-SAGUY).



683 MG was part of the Pasteur-Paris University (PPU) International PhD Program. BCC was supported  
684 by The Fondation pour la Recherche Médicale (grant N° FDT202106013076).

## 685 **8 Acknowledgments**

686 We thank the staff of the crystallography platform at Institut Pasteur for carrying out robot-driven  
687 crystallization screening. We thank the Institut Pasteur molecular biophysics platform for the technical  
688 help and access to instruments. We thank the Institut Pasteur biological NMR technological platform  
689 for access to instruments and help with NMR experiments. We acknowledge synchrotron SOLEIL  
690 (Saint-Aubin, France) for granting access to their facility and the staff of Proxima1 for helpful  
691 assistance during the data collection and Aurelien thureau and Javier Perez for the SWING beamline.

## 692 **9 Data Availability Statement**

693 The original contributions presented in the study are included in the article/Supplementary Material,  
694 further inquiries can be directed to the corresponding author.

## 695 **10 References**

- 696 Adams, P. D., Afonine, P. V., Bunkóczi, G., Chen, V. B., Davis, I. W., Echols, N., et al. (2010).  
697 PHENIX: a comprehensive Python-based system for macromolecular structure solution. *Acta*  
698 *Crystallogr. D Biol. Crystallogr* 66, 213–221. doi: 10.1107/S0907444909052925.
- 699 Babault, N., Cordier, F., Lafage, M., Cockburn, J., Haouz, A., Prehaud, C., et al. (2011). Peptides  
700 targeting the PDZ domain of PTPN4 are efficient inducers of glioblastoma cell death.  
701 *Structure* 19, 1518–1524. doi: 10.1016/j.str.2011.07.007.
- 702 Birrane, G., Mulvaney, E. P., Pal, R., Kinsella, B. T., and Kocher, O. (2013). Molecular analysis of  
703 the prostacyclin receptor's interaction with the PDZ1 domain of its adaptor protein PDZK1.  
704 *PLoS One* 8, e53819. doi: 10.1371/journal.pone.0053819.
- 705 Bohlson, S. S., Zhang, M., Ortiz, C. E., and Tenner, A. J. (2005). CD93 interacts with the PDZ  
706 domain-containing adaptor protein GIPC: implications in the modulation of phagocytosis. *J*  
707 *Leukoc Biol* 77, 80–89. doi: 10.1189/jlb.0504305.
- 708 Caillet-Saguy, C., Maisonneuve, P., Delhommel, F., Terrien, E., Babault, N., Lafon, M., et al. (2015).  
709 Strategies to interfere with PDZ-mediated interactions in neurons: What we can learn from  
710 the rabies virus. *Prog. Biophys. Mol. Biol.* 119, 53–59. doi:  
711 10.1016/j.pbiomolbio.2015.02.007.
- 712 Caillet-Saguy, C., Toto, A., Guerois, R., Maisonneuve, P., di Silvio, E., Sawyer, K., et al. (2017).  
713 Regulation of the Human Phosphatase PTPN4 by the inter-domain linker connecting the PDZ  
714 and the phosphatase domains. *Sci Rep* 7, 7875. doi: 10.1038/s41598-017-08193-6.
- 715 Chastre, E., Abdessamad, M., Kruglov, A., Bruyneel, E., Bracke, M., Di Gioia, Y., et al. (2009).  
716 TRIP6, a novel molecular partner of the MAGI-1 scaffolding molecule, promotes  
717 invasiveness. *FASEB J* 23, 916–928. doi: 10.1096/fj.08-106344.

- 718 Chen, K.-E., Li, M.-Y., Chou, C.-C., Ho, M.-R., Chen, G.-C., Meng, T.-C., et al. (2015). Substrate  
719 specificity and plasticity of FERM-containing protein tyrosine phosphatases. *Structure* 23,  
720 653–664. doi: 10.1016/j.str.2015.01.017.
- 721 Chen, K.-E., Lin, S.-Y., Wu, M.-J., Ho, M.-R., Santhanam, A., Chou, C.-C., et al. (2014). Reciprocal  
722 allosteric regulation of p38 $\gamma$  and PTPN3 involves a PDZ domain-modulated complex  
723 formation. *Sci Signal* 7, ra98. doi: 10.1126/scisignal.2005722.
- 724 Cuppen, E., van Ham, M., Wansink, D. G., de Leeuw, A., Wieringa, B., and Hendriks, W. (2000).  
725 The zyxin-related protein TRIP6 interacts with PDZ motifs in the adaptor protein RIL and the  
726 protein tyrosine phosphatase PTP-BL. *Eur J Cell Biol* 79, 283–293. doi: 10.1078/S0171-  
727 9335(04)70031-X.
- 728 De Vries, L., Lou, X., Zhao, G., Zheng, B., and Farquhar, M. G. (1998). GIPC, a PDZ domain  
729 containing protein, interacts specifically with the C terminus of RGS-GAIP. *Proc Natl Acad  
730 Sci U S A* 95, 12340–12345. doi: 10.1073/pnas.95.21.12340.
- 731 Duhoo, Y., Girault, V., Turchetto, J., Ramond, L., Durbesson, F., Fourquet, P., et al. (2019). High-  
732 Throughput Production of a New Library of Human Single and Tandem PDZ Domains  
733 Allows Quantitative PDZ-Peptide Interaction Screening Through High-Throughput Holdup  
734 Assay. *Methods Mol. Biol.* 2025, 439–476. doi: 10.1007/978-1-4939-9624-7\_21.
- 735 Elkins, J. M., Gileadi, C., Shrestha, L., Phillips, C., Wang, J., Muniz, J. R. C., et al. (2010). Unusual  
736 binding interactions in PDZ domain crystal structures help explain binding mechanisms.  
737 *Protein Sci.* 19, 731–741. doi: 10.1002/pro.349.
- 738 Emsley, P., Lohkamp, B., Scott, W. G., and Cowtan, K. (2010). Features and development of Coot.  
739 *Acta Crystallogr. D Biol. Crystallogr* 66, 486–501. doi: 10.1107/S0907444910007493.
- 740 Evans, P. R. (2011). An introduction to data reduction: space-group determination, scaling and  
741 intensity statistics. *Acta Crystallogr D Biol Crystallogr* 67, 282–292. doi:  
742 10.1107/S090744491003982X.
- 743 Evans, P. R., and Murshudov, G. N. (2013). How good are my data and what is the resolution? *Acta  
744 Crystallogr D Biol Crystallogr* 69, 1204–1214. doi: 10.1107/S0907444913000061.
- 745 Gao, Q., Zhao, Y.-J., Wang, X.-Y., Guo, W.-J., Gao, S., Wei, L., et al. (2014). Activating mutations  
746 in PTPN3 promote cholangiocarcinoma cell proliferation and migration and are associated  
747 with tumor recurrence in patients. *Gastroenterology* 146, 1397–1407. doi:  
748 10.1053/j.gastro.2014.01.062.
- 749 Genera, M., Quioc-Salomon, B., Nourisson, A., Colcombet-Cazenave, B., Haouz, A., Mechaly, A., et  
750 al. (2021). Molecular basis of the interaction of the human tyrosine phosphatase PTPN3 with  
751 the hepatitis B virus core protein. *Sci Rep* 11, 944. doi: 10.1038/s41598-020-79580-9.
- 752 Genera, M., Samson, D., Raynal, B., Haouz, A., Baron, B., Simenel, C., et al. (2019). Structural and  
753 functional characterization of the PDZ domain of the human phosphatase PTPN3 and its  
754 interaction with the human papillomavirus E6 oncoprotein. *Scientific Reports* 9, 7438. doi:  
755 10.1038/s41598-019-43932-x.

- 756 Gogl, G., Zambo, B., Kostmann, C., Cousido-Siah, A., Morlet, B., Durbesson, F., et al. (2022).  
757 Quantitative fragmentomics allow affinity mapping of interactomes. *Nat Commun* 13, 5472.  
758 doi: 10.1038/s41467-022-33018-0.
- 759 Hendriks, W. J. A. J., and Böhmer, F.-D. (2016). *Non-transmembrane PTPs in Cancer in Protein*  
760 *Tyrosine Phosphatases in Cancer* (ed. Neel B. G. & Tonks N. K.). Springer.
- 761 Hirakawa, T., Galet, C., Kishi, M., and Ascoli, M. (2003). GIPC binds to the human lutropin receptor  
762 (hLHR) through an unusual PDZ domain binding motif, and it regulates the sorting of the  
763 internalized human choriogonadotropin and the density of cell surface hLHR. *J Biol Chem*  
764 278, 49348–49357. doi: 10.1074/jbc.M306557200.
- 765 Hof, P., Pluskey, S., Dhe-Paganon, S., Eck, M. J., and Shoelson, S. E. (1998). Crystal structure of the  
766 tyrosine phosphatase SHP-2. *Cell* 92, 441–450. doi: 10.1016/s0092-8674(00)80938-1.
- 767 Hou, S., Suresh, P. S., Qi, X., Lepp, A., Mirza, S. P., and Chen, G. (2012). p38 $\gamma$  Mitogen-activated  
768 protein kinase signals through phosphorylating its phosphatase PTPH1 in regulating ras  
769 protein oncogenesis and stress response. *J. Biol. Chem.* 287, 27895–27905. doi:  
770 10.1074/jbc.M111.335794.
- 771 Hou, S.-W., Zhi, H.-Y., Pohl, N., Loesch, M., Qi, X.-M., Li, R.-S., et al. (2010). PTPH1  
772 dephosphorylates and cooperates with p38 $\gamma$  MAPK to increase ras oncogenesis through  
773 PDZ-mediated interaction. *Cancer Res.* 70, 2901–2910. doi: 10.1158/0008-5472.CAN-09-  
774 3229.
- 775 Hsu, E.-C., Lin, Y.-C., Hung, C.-S., Huang, C.-J., Lee, M.-Y., Yang, S.-C., et al. (2007). Suppression  
776 of hepatitis B viral gene expression by protein-tyrosine phosphatase PTPN3. *J. Biomed. Sci.*  
777 14, 731–744. doi: 10.1007/s11373-007-9187-x.
- 778 Huang, Q., Li, M., Lai, L., and Liu, Z. (2020). Allostery of multidomain proteins with disordered  
779 linkers. *Curr Opin Struct Biol* 62, 175–182. doi: 10.1016/j.sbi.2020.01.017.
- 780 Im, Y. J., Park, S. H., Rho, S.-H., Lee, J. H., Kang, G. B., Sheng, M., et al. (2003). Crystal structure  
781 of GRIP1 PDZ6-peptide complex reveals the structural basis for class II PDZ target  
782 recognition and PDZ domain-mediated multimerization. *J. Biol. Chem.* 278, 8501–8507. doi:  
783 10.1074/jbc.M212263200.
- 784 James, C. D., and Roberts, S. (2016). Viral Interactions with PDZ Domain-Containing Proteins-An  
785 Oncogenic Trait? *Pathogens* 5. doi: 10.3390/pathogens5010008.
- 786 Jeanneteau, F., Diaz, J., Sokoloff, P., and Griffon, N. (2004). Interactions of GIPC with dopamine  
787 D2, D3 but not D4 receptors define a novel mode of regulation of G protein-coupled  
788 receptors. *Mol Biol Cell* 15, 696–705. doi: 10.1091/mbc.e03-05-0293.
- 789 Jing, M., Bohl, J., Brimer, N., Kinter, M., and Vande Pol, S. B. (2007). Degradation of tyrosine  
790 phosphatase PTPN3 (PTPH1) by association with oncogenic human papillomavirus E6  
791 proteins. *J. Virol.* 81, 2231–2239. doi: 10.1128/JVI.01979-06.
- 792 Julien, S. G., Dubé, N., Hardy, S., and Tremblay, M. L. (2011). Inside the human cancer tyrosine  
793 phosphatome. *Nat. Rev. Cancer* 11, 35–49. doi: 10.1038/nrc2980.

- 794 Jumper, J., Evans, R., Pritzel, A., Green, T., Figurnov, M., Ronneberger, O., et al. (2021). Highly  
795 accurate protein structure prediction with AlphaFold. *Nature* 596, 583–589. doi:  
796 10.1038/s41586-021-03819-2.
- 797 Kabsch, W. (2010). XDS. *Acta Crystallogr. D Biol. Crystallogr* 66, 125–132. doi:  
798 10.1107/S0907444909047337.
- 799 Kalyoncu, S., Keskin, O., and Gursoy, A. (2010). Interaction prediction and classification of PDZ  
800 domains. *BMC Bioinformatics* 11, 357. doi: 10.1186/1471-2105-11-357.
- 801 Kang, B. S., Cooper, D. R., Jelen, F., Devedjiev, Y., Derewenda, U., Dauter, Z., et al. (2003). PDZ  
802 tandem of human syntenin: crystal structure and functional properties. *Structure* 11, 459–468.  
803 doi: 10.1016/s0969-2126(03)00052-2.
- 804 Katoh, K., and Standley, D. M. (2013). MAFFT multiple sequence alignment software version 7:  
805 improvements in performance and usability. *Mol. Biol. Evol.* 30, 772–780. doi:  
806 10.1093/molbev/mst010.
- 807 Konarev, P. V., Volkov, V. V., Sokolova, A. V., Koch, M. H., and Svergun, D. I. (2003). PRIMUS: a  
808 Windows PC-based system for small-angle scattering data analysis. *J. Appl. Cryst.* 36, 1277–  
809 1282.
- 810 Ligensa, T., Krauss, S., Demuth, D., Schumacher, R., Camonis, J., Jaques, G., et al. (2001). A PDZ  
811 domain protein interacts with the C-terminal tail of the insulin-like growth factor-1 receptor  
812 but not with the insulin receptor. *J Biol Chem* 276, 33419–33427. doi:  
813 10.1074/jbc.M104509200.
- 814 Long, J.-F., Feng, W., Wang, R., Chan, L.-N., Ip, F. C. F., Xia, J., et al. (2005). Autoinhibition of  
815 X11/Mint scaffold proteins revealed by the closed conformation of the PDZ tandem. *Nat*  
816 *Struct Mol Biol* 12, 722–728. doi: 10.1038/nsmb958.
- 817 Ma, S., Yin, N., Qi, X., Pfister, S. L., Zhang, M.-J., Ma, R., et al. (2015). Tyrosine dephosphorylation  
818 enhances the therapeutic target activity of epidermal growth factor receptor (EGFR) by  
819 disrupting its interaction with estrogen receptor (ER). *Oncotarget* 6, 13320–13333. doi:  
820 10.18632/oncotarget.3645.
- 821 Maisonneuve, P., Caillet-Saguy, C., Raynal, B., Gilquin, B., Chaffotte, A., Pérez, J., et al. (2014).  
822 Regulation of the catalytic activity of the human phosphatase PTPN4 by its PDZ domain.  
823 *FEBS J.* 281, 4852–4865. doi: 10.1111/febs.13024.
- 824 Maisonneuve, P., Caillet-Saguy, C., Vaney, M.-C., Bibi-Zainab, E., Sawyer, K., Raynal, B., et al.  
825 (2016). Molecular Basis of the Interaction of the Human Protein Tyrosine Phosphatase Non-  
826 receptor Type 4 (PTPN4) with the Mitogen-activated Protein Kinase p38 $\gamma$ . *J Biol Chem* 291,  
827 16699–16708. doi: 10.1074/jbc.M115.707208.
- 828 McCoy, A. J. (2007). Solving structures of protein complexes by molecular replacement with Phaser.  
829 *Acta Crystallogr. D Biol. Crystallogr.* 63, 32–41. doi: 10.1107/S0907444906045975.

- 830 Petit, M. M. R., Crombez, K. R. M. O., Vervenne, H. B. V. K., Weyns, N., and Van de Ven, W. J. M.  
831 (2005). The tumor suppressor Scrib selectively interacts with specific members of the zyxin  
832 family of proteins. *FEBS Lett* 579, 5061–5068. doi: 10.1016/j.febslet.2005.08.012.
- 833 Préhaud, C., Wolff, N., Terrien, E., Lafage, M., Mégret, F., Babault, N., et al. (2010). Attenuation of  
834 rabies virulence: takeover by the cytoplasmic domain of its envelope protein. *Sci Signal* 3,  
835 ra5. doi: 10.1126/scisignal.2000510.
- 836 Razanskas, R., and Sasnauskas, K. (2010). Interaction of hepatitis B virus core protein with human  
837 GIPC1. *Archives of Virology* 155, 247–250. doi: 10.1007/s00705-009-0561-z.
- 838 Schuck, P. (2000). Size-distribution analysis of macromolecules by sedimentation velocity  
839 ultracentrifugation and lamm equation modeling. *Biophys. J.* 78, 1606–1619. doi:  
840 10.1016/S0006-3495(00)76713-0.
- 841 Sheng, M., and Sala, C. (2001). PDZ domains and the organization of supramolecular complexes.  
842 *Annu Rev Neurosci* 24, 1–29. doi: 10.1146/annurev.neuro.24.1.1.
- 843 Songyang, Z., Fanning, A. S., Fu, C., Xu, J., Marfatia, S. M., Chishti, A. H., et al. (1997).  
844 Recognition of unique carboxyl-terminal motifs by distinct PDZ domains. *Science* 275, 73–  
845 77. doi: 10.1126/science.275.5296.73.
- 846 Spill, Y. G., Karami, Y., Maisonneuve, P., Wolff, N., and Nilges, M. (2021). Automatic Bayesian  
847 Weighting for SAXS Data. *Front Mol Biosci* 8, 671011. doi: 10.3389/fmolb.2021.671011.
- 848 Sugi, T., Oyama, T., Muto, T., Nakanishi, S., Morikawa, K., and Jingami, H. (2007). Crystal  
849 structures of autoinhibitory PDZ domain of Tamalin: implications for metabotropic glutamate  
850 receptor trafficking regulation. *EMBO J.* 26, 2192–2205. doi: 10.1038/sj.emboj.7601651.
- 851 Töpffer, S., Müller-Schiffmann, A., Matentzoglou, K., Scheffner, M., and Steger, G. (2007). Protein  
852 tyrosine phosphatase H1 is a target of the E6 oncoprotein of high-risk genital human  
853 papillomaviruses. *J. Gen. Virol.* 88, 2956–2965. doi: 10.1099/vir.0.83123-0.
- 854 Varadi, M., Anyango, S., Deshpande, M., Nair, S., Natassia, C., Yordanova, G., et al. (2022).  
855 AlphaFold Protein Structure Database: massively expanding the structural coverage of  
856 protein-sequence space with high-accuracy models. *Nucleic Acids Res* 50, D439–D444. doi:  
857 10.1093/nar/gkab1061.
- 858 Vincentelli, R., Luck, K., Poirson, J., Polanowska, J., Abdat, J., Blémont, M., et al. (2015).  
859 Quantifying domain-ligand affinities and specificities by high-throughput holdup assay. *Nat.*  
860 *Methods* 12, 787–793. doi: 10.1038/nmeth.3438.
- 861 Vranken, W. F., Boucher, W., Stevens, T. J., Fogh, R. H., Pajon, A., Llinas, M., et al. (2005). The  
862 CCPN data model for NMR spectroscopy: development of a software pipeline. *Proteins* 59,  
863 687–696. doi: 10.1002/prot.20449.
- 864 Weber, P., Pissis, C., Navaza, R., Mechaly, A. E., Saul, F., Alzari, P. M., et al. (2019). High-  
865 Throughput Crystallization Pipeline at the Crystallography Core Facility of the Institut  
866 Pasteur. *Molecules* 24, E4451. doi: 10.3390/molecules24244451.

867 Winn, M. D., Ballard, C. C., Cowtan, K. D., Dodson, E. J., Emsley, P., Evans, P. R., et al. (2011).  
868 Overview of the CCP4 suite and current developments. *Acta Crystallogr. D Biol. Crystallogr.*  
869 67, 235–242. doi: 10.1107/S0907444910045749.

870 Zhang, S. H., Eckberg, W. R., Yang, Q., Samatar, A. A., and Tonks, N. K. (1995). Biochemical  
871 characterization of a human band 4.1-related protein-tyrosine phosphatase, PTPH1. *J. Biol.*  
872 *Chem.* 270, 20067–20072.

873 Zheng, Y., Schlondorff, J., and Blobel, C. P. (2002). Evidence for regulation of the tumor necrosis  
874 factor alpha-convertase (TACE) by protein-tyrosine phosphatase PTPH1. *J. Biol. Chem.* 277,  
875 42463–42470. doi: 10.1074/jbc.M207459200.

876 Zhi, H.-Y., Hou, S.-W., Li, R.-S., Basir, Z., Xiang, Q., Szabo, A., et al. (2011). PTPH1 cooperates  
877 with vitamin D receptor to stimulate breast cancer growth through their mutual stabilization.  
878 *Oncogene* 30, 1706–1715. doi: 10.1038/onc.2010.543.

## 879 12 Figures legends

### 880 **Figure 1. Schematic representation of PTPN3 and the constructs.**

881 The FERM, PDZ and PTP domains are represented. The boundaries of the full-length and the  
882 constructs are shown. Bidomain encompasses the PDZ and the PTP domains; Linker-PTP contains the  
883 linker and the PTP domain; shLinker-PTP contains a shorter linker and the PTP domain.

### 884 **Figure 2. Insights of the binding network of PTPN3-PDZ with the PBM peptides of HPV16 E6,** 885 **HPV18 E6, HBc and TACE.**

886 Secondary structure elements of PTPN3-PDZ are shown in white trace, and relevant residues are shown  
887 in white sticks. Peptides are shown as coloured sticks, with the corresponding name indicated below  
888 the structure. Polar interactions are shown as black dashes.

### 889 **Figure 3. Comparison of PDZ domain sequence conservations from PTPN3 and PTPN4** 890 **orthologs and of the human PDZome.**

891 The result is displayed using a logo representation (Crooks et al., 2004), where the height of each  
892 residue one-letter code translates to its conservation at the corresponding position of the PTPN3-PDZ  
893 numbering in the sequence alignment. Sequence logo showing the sequence conservation of A) PTPN3  
894 and PTPN4 orthologs and of B) the human PDZome.

### 895 **Figure 4. Comparison of sequence conservations of PBMs of p38 $\gamma$ , HPV16 E6, HPV18 E6, HBc** 896 **and TACE.**

897 For each extension, all UniprotKB sequences of the corresponding protein were aligned. The result is  
898 displayed using a logo representation (Crooks et al., 2004), where the height of each residue one-letter  
899 code translates to its conservation at the corresponding position in the sequence alignment. Amino  
900 acids are coloured according to their chemical properties: polar amino acids (G,S,T,Y,C,Q,N) are  
901 green, basic (K,R,H) blue, acidic (D,E) red and hydrophobic (A,V,L,I,P,W,F,M) amino acids are black.  
902 The positions of the PBM are indicated above the sequences.

903 **Figure 5. Frequency plot of the C-terminal residues of the PBM-containing partners of PTPN3-**  
904 **PDZ identified from cell lysate by pull-down.**

905 For each extension, all UniprotKB sequences were aligned (Supplementary Material 3). The result is  
906 displayed using a logo representation (Crooks et al., 2004), where the height of each residue one-letter  
907 code translates to its conservation at the corresponding position in the sequence alignment. Amino  
908 acids are coloured according to their chemical properties: polar amino acids (G,S,T,Y,C,Q,N) are  
909 green, basic (K,R,H) blue, acidic (D,E) red and hydrophobic (A,V,L,I,P,W,F,M) amino acids are black.  
910 The positions of the PBM are indicated above the sequences.

911 **Figure 6. Comparison of PDZ domain sequence conservations recruited by PBM-p38 $\gamma$  and PBM-**  
912 **HBc.**

913 The result is displayed using a logo representation (Crooks et al., 2004), where the height of each  
914 residue one-letter code translates to its conservation at the corresponding position of the PTPN3-PDZ  
915 numbering in the sequence alignment. Sequence logo showing the sequence conservation of PDZ  
916 domains recruited during holdup experiment by A) PBM-p38 $\gamma$  and B) by PBM-HBc.

917 **Figure 7. Regulation of the phosphatase activity of PTPN3.**

918 (A) Michaelis-Menten plots of the initial rates of pNPP hydrolysis by PTPN3 constructs. The  $K_M$  and  
919  $k_{cat}$  constants were deduced by fitting the data to a modified Michaelis-Menten equation, considering  
920 the substrate inhibition observed at high concentrations of pNPP. The data and error bars are  
921 representative of three independent experiments. The curves are nonlinear fits to a substrate-inhibition  
922 equation. (B) Initial rates of pNPP dephosphorylation at 2.5 mM pNPP by PTPN3-linker-PTP, PTPN3-  
923 linker-PTP pre-incubated with PTPN3-PDZ, and PTPN3-Bidomain. PTPN3-linker-PTP and PTPN3-  
924 Bidomain were at a concentration of 75 nM, while PTPN3-PDZ was added at a concentration of 6  $\mu$ M.  
925 The data and error bars are representative of three independent experiments.

926 **Figure 8. AUC and SAXS analysis of PTPN3 Bidomain.**

927 Data of PTPN3 Bidomain WT free and complexed to PBM-p38 $\gamma$  peptide are represented in green and  
928 orange, respectively. (A) Sedimentation coefficient distributions of free PTPN3 Bidomain. (B)  
929 Experimental SAXS data ( $I(q)$  versus  $q$ ). (C) The  $P(r)$  function of the SAXS data, where  $P$  is the pair  
930 distance distribution function and  $r$  is the distance vector. (D) Dimensionless Kratky plots. (E)(F)  
931 Models of Bidomain obtained from SAXS data. Models were generated using CORAL based on the  
932 X-ray structures of the PDZ (PDB code 6T36) and the catalytic domain (PDB code 2B49) of PTPN3.  
933 The two domains were rigid and the linker, the N-terminal and the C-terminal part of the PTPN3 were  
934 set in random conformations. 50 models were generated, the best model is presented. The model of  
935 PTPN3 free (E) and in complex with PBM-p38 $\gamma$  (F) were generated comparably including the PBM  
936 (in red) within the X-ray structure of the PDZ. Known structures are in blue. The interdomain linker,  
937 the N- and C-terminal parts of the bidomain are shown as purple spheres.

938 **13 Tables**

939 **Table 1. Affinities and peptide sequences of PBMs of cellular and viral partners of PTPN3-**  
940 **PDZ.**

| Protein partners | Peptides (PBM)   | Sequences         | $K_D^*$ $\mu$ M |
|------------------|------------------|-------------------|-----------------|
|                  |                  | -4-3-2-1 0        |                 |
| p38 $\gamma$     | PBM-p38 $\gamma$ | WARVS K E T P L   | 29              |
| HPV type 16 E6   | PBM-16E6         | RSSRTR R E T Q L  | 53              |
| HPV type 18 E6   | PBM-18E6         | RQERLQR R E T Q V | 37              |
| HBV core         | PBM-HBc          | RRRRSQS R E S Q C | 29              |
| TACE             | PBM-TACE         | RQNRVDS K E T E C | 30*             |

941 \* $K_D$  of PBM-TACE for PTPN3-PDZ was determined in this work while the others were previously  
 942 reported by us in (Genera et al., 2019).

943 **Table 2. Data collection and refinement statistics.**

| PTPN3-PDZ in complex with PBM peptides |                             |                                |
|----------------------------------------|-----------------------------|--------------------------------|
|                                        | PBM-18E6                    | PBM-TACE                       |
|                                        | RQERLQRRETQV                | RQNRVDSKETEC                   |
| <b>Wavelength</b>                      | 0.9786                      | 0.98                           |
| <b>Resolution range</b>                | 31.7 - 1.873 (1.94 - 1.873) | 66.58 - 1.7 (1.761 - 1.7)      |
| <b>Space group</b>                     | P 65 2 2                    | P 32 2 1                       |
| <b>Unit cell</b>                       | 82.23 82.23 139.2 90 90 120 | 76.878 76.878 46.253 90 90 120 |
| <b>Total reflections</b>               | 291759 (27178)              | 244763 (23662)                 |
| <b>Unique reflections</b>              | 23304 (2137)                | 17566 (1726)                   |
| <b>Multiplicity</b>                    | 12.5 (12.7)                 | 13.9 (13.7)                    |
| <b>Completeness (%)</b>                | 98.70 (93.07)               | 99.50 (98.40)                  |
| <b>Mean I/sigma(I)</b>                 | 18.12 (1.91)                | 12.51 (1.57)                   |



|                                       |                  |                  |
|---------------------------------------|------------------|------------------|
| <b>Wilson B-factor</b>                | 33.51            | 42.30            |
| <b>R-merge</b>                        | 0.08981 (1.385)  | 0.1035 (1.433)   |
| <b>R-meas</b>                         | 0.09363 (1.443)  | 0.1079 (1.489)   |
| <b>R-pim</b>                          | 0.02571 (0.3905) | 0.02982 (0.3998) |
| <b>CC1/2</b>                          | 0.999 (0.846)    | 0.997 (0.887)    |
| <b>CC*</b>                            | 1 (0.957)        | 0.999 (0.97)     |
| <b>Reflections used in refinement</b> | 23304 (2134)     | 17573 (1726)     |
| <b>Reflections used for R-free</b>    | 1164 (107)       | 903 (80)         |
| <b>R-work</b>                         | 0.1983 (0.3067)  | 0.1576 (0.2825)  |
| <b>R-free</b>                         | 0.2488 (0.3477)  | 0.1929 (0.3172)  |
| <b>CC(work)</b>                       | 0.954 (0.845)    | 0.816 (0.522)    |
| <b>CC(free)</b>                       | 0.926 (0.857)    | 0.791 (0.461)    |
| <b>Number of non-hydrogen atoms</b>   | 1763             | 808              |
| <b>macromolecules</b>                 | 1630             | 784              |
| <b>ligands</b>                        | 1                | 2                |
| <b>solvent</b>                        | 132              | 22               |
| <b>Protein residues</b>               | 202              | 99               |
| <b>RMS(bonds)</b>                     | 0.012            | 0.032            |
| <b>RMS(angles)</b>                    | 1.93             | 2.81             |

|                                  |        |       |
|----------------------------------|--------|-------|
| <b>Ramachandran favored (%)</b>  | 100.00 | 95.79 |
| <b>Ramachandran allowed (%)</b>  | 0      | 4.21  |
| <b>Ramachandran outliers (%)</b> | 0.00   | 0.00  |
| <b>Rotamer outliers (%)</b>      | 0.54   | 8.89  |
| <b>Clashscore</b>                | 6.99   | 10.79 |
| <b>Average B-factor</b>          | 45.16  | 43.93 |
| <b>macromolecules</b>            | 45.18  | 44.09 |
| <b>ligands</b>                   | 84.60  | 42.06 |
| <b>solvent</b>                   | 44.62  | 38.20 |
| <b>Number of TLS groups</b>      | 4      | 2     |
| <b>PDB code</b>                  | 8OEP   | 8CQY  |

944 Statistics for the highest-resolution shell are shown in parentheses.

945 **Table 3. Kinetic parameters of hydrolysis of pNPP by PTPN3 constructs.**

| <b>Construct</b>    | <b>K<sub>M</sub> (mM)</b> | <b>k<sub>cat</sub> (s<sup>-1</sup>)</b> | <b>k<sub>cat</sub>/K<sub>M</sub></b> |
|---------------------|---------------------------|-----------------------------------------|--------------------------------------|
| Linker-PTP          | 1.0 ± 0.1                 | 3.0 ± 0.1                               | 2941 ± 241                           |
| shLinker-PTP        | 1.2 ± 0.1                 | 3.2 ± 0.2                               | 2706 ± 340                           |
| Bidomain            | 0.8 ± 0.1                 | 1.5 ± 0.1                               | 1848 ± 234                           |
| Bidomain + PBM-HBc  | 1.3 ± 0.1                 | 1.6 ± 0.1                               | 1233 ± 151                           |
| Bidomain + PBM-16E6 | 0.8 ± 0.1                 | 1.5 ± 0.1                               | 2000 ± 180                           |
| Bidomain + PBM-p38γ | 1.2 ± 0.3                 | 1.7 ± 0.2                               | 1397 ± 346                           |
| Bidomain + PBM-TACE | 0.9 ± 0.2                 | 1.7 ± 0.1                               | 1874 ± 490                           |

946 The data are representative of three independent experiments.

947 **Table 4. Hydrodynamic parameters of PTPN3-Bidomain derived from the analysis of AUC and**  
948 **SAXS data.**

|      | Hydrodynamic parameters | PTPN3-Bidomain/ PTPN3-Bidomain+ PBM-p38 $\gamma$ |
|------|-------------------------|--------------------------------------------------|
| AUC  | Mass theoretical (kDa)  | 52.5                                             |
|      | $S_{0,w,20}$ (S)        | 2.8                                              |
|      | $f/f_0$                 | 1.6                                              |
| SAXS | $R_g$ (Å)               | 33/34                                            |
|      | $D_{max}$ (Å)           | 133/132                                          |

949 The normalized sedimentation coefficients ( $S_0$ ) were processed to get the standard sedimentation  
950 coefficients in water at 20 °C ( $S_{0,w,20}$ ).

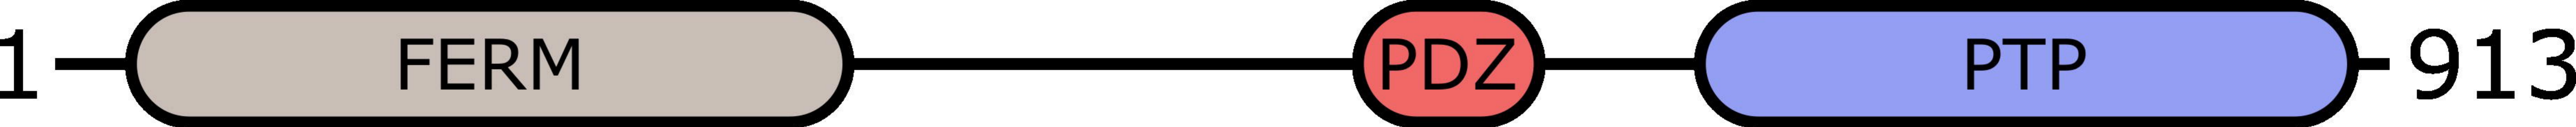

Bidomain

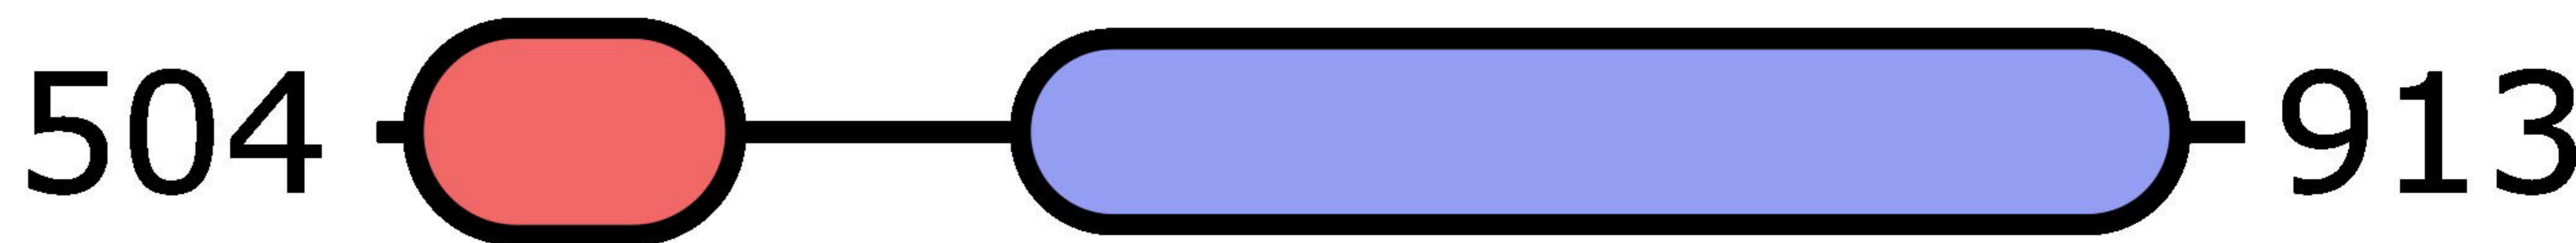

Linker-PTP

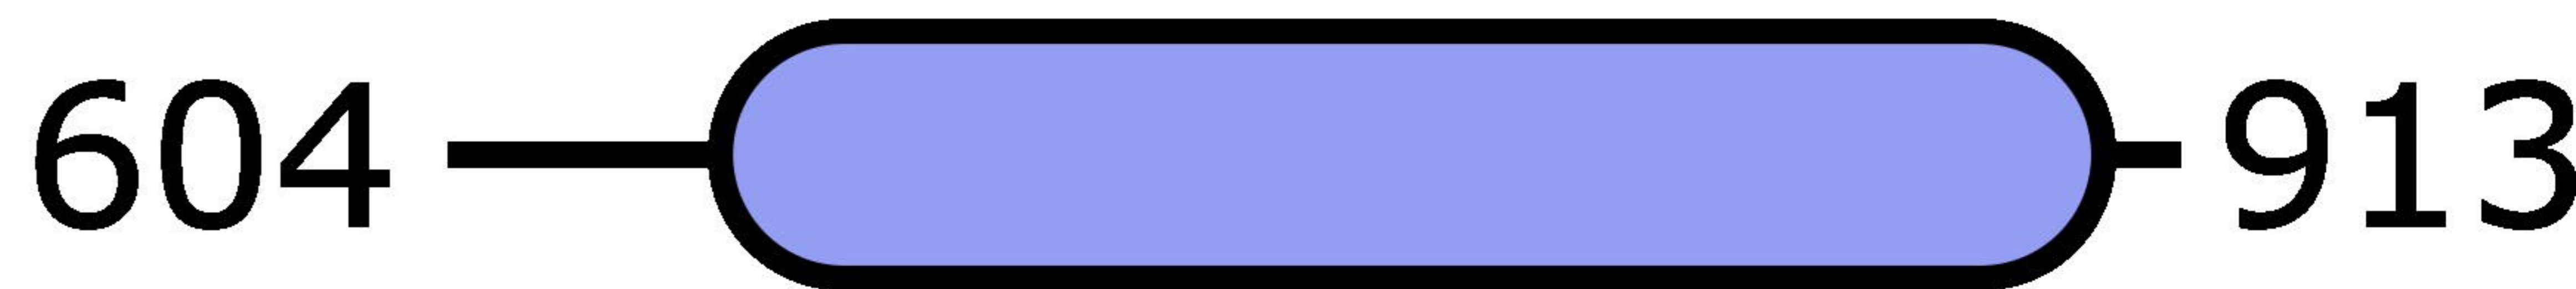

shLinker-PTP

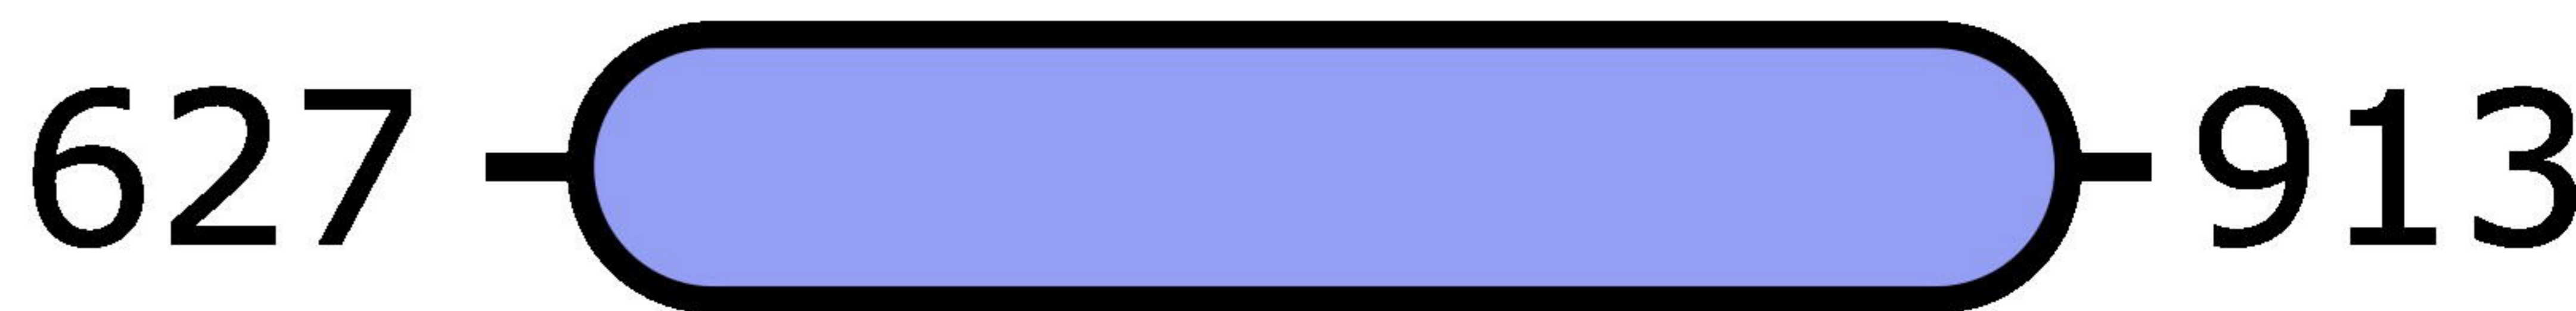

PDZ

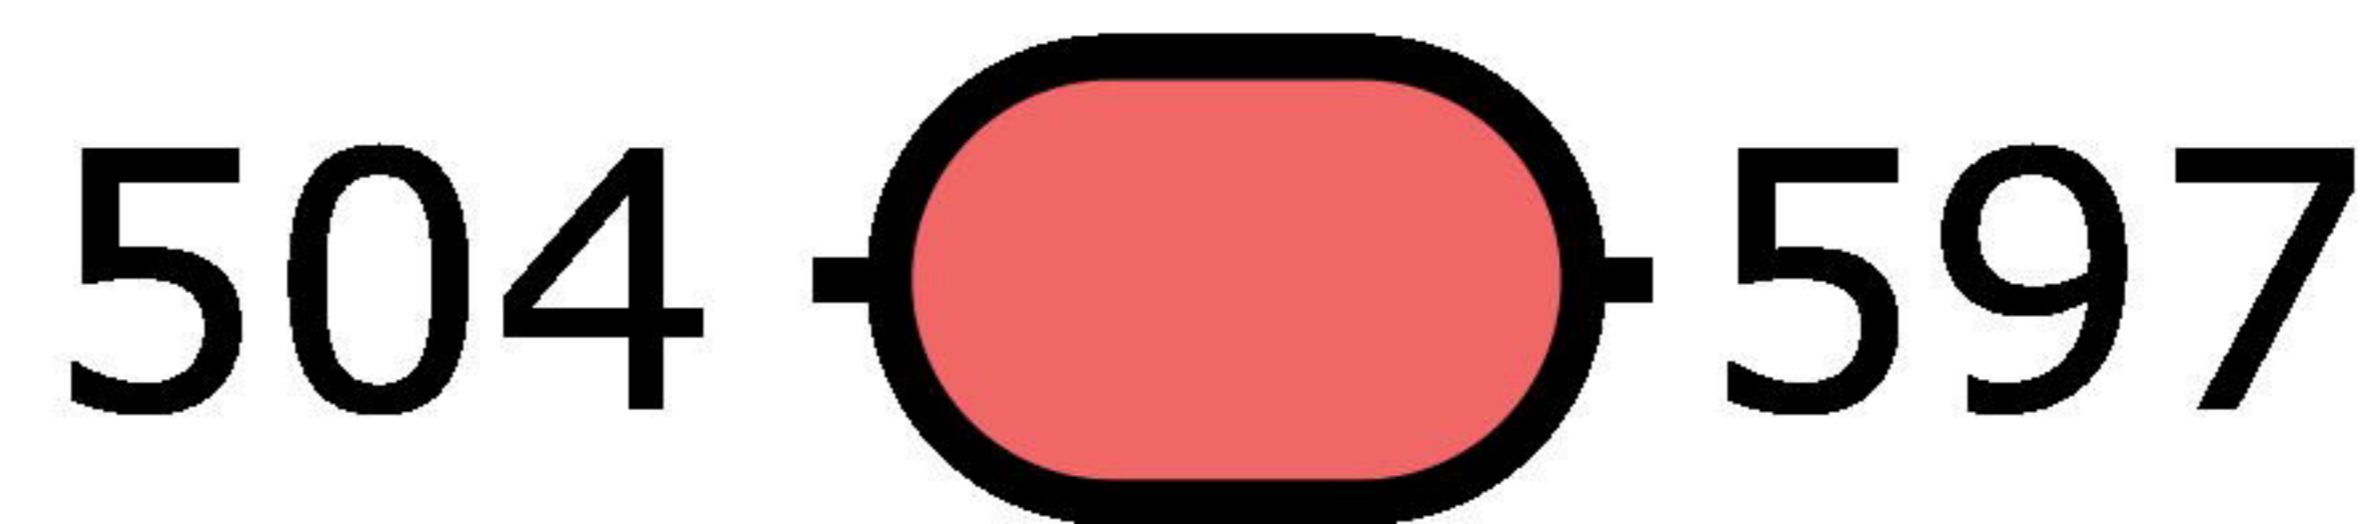

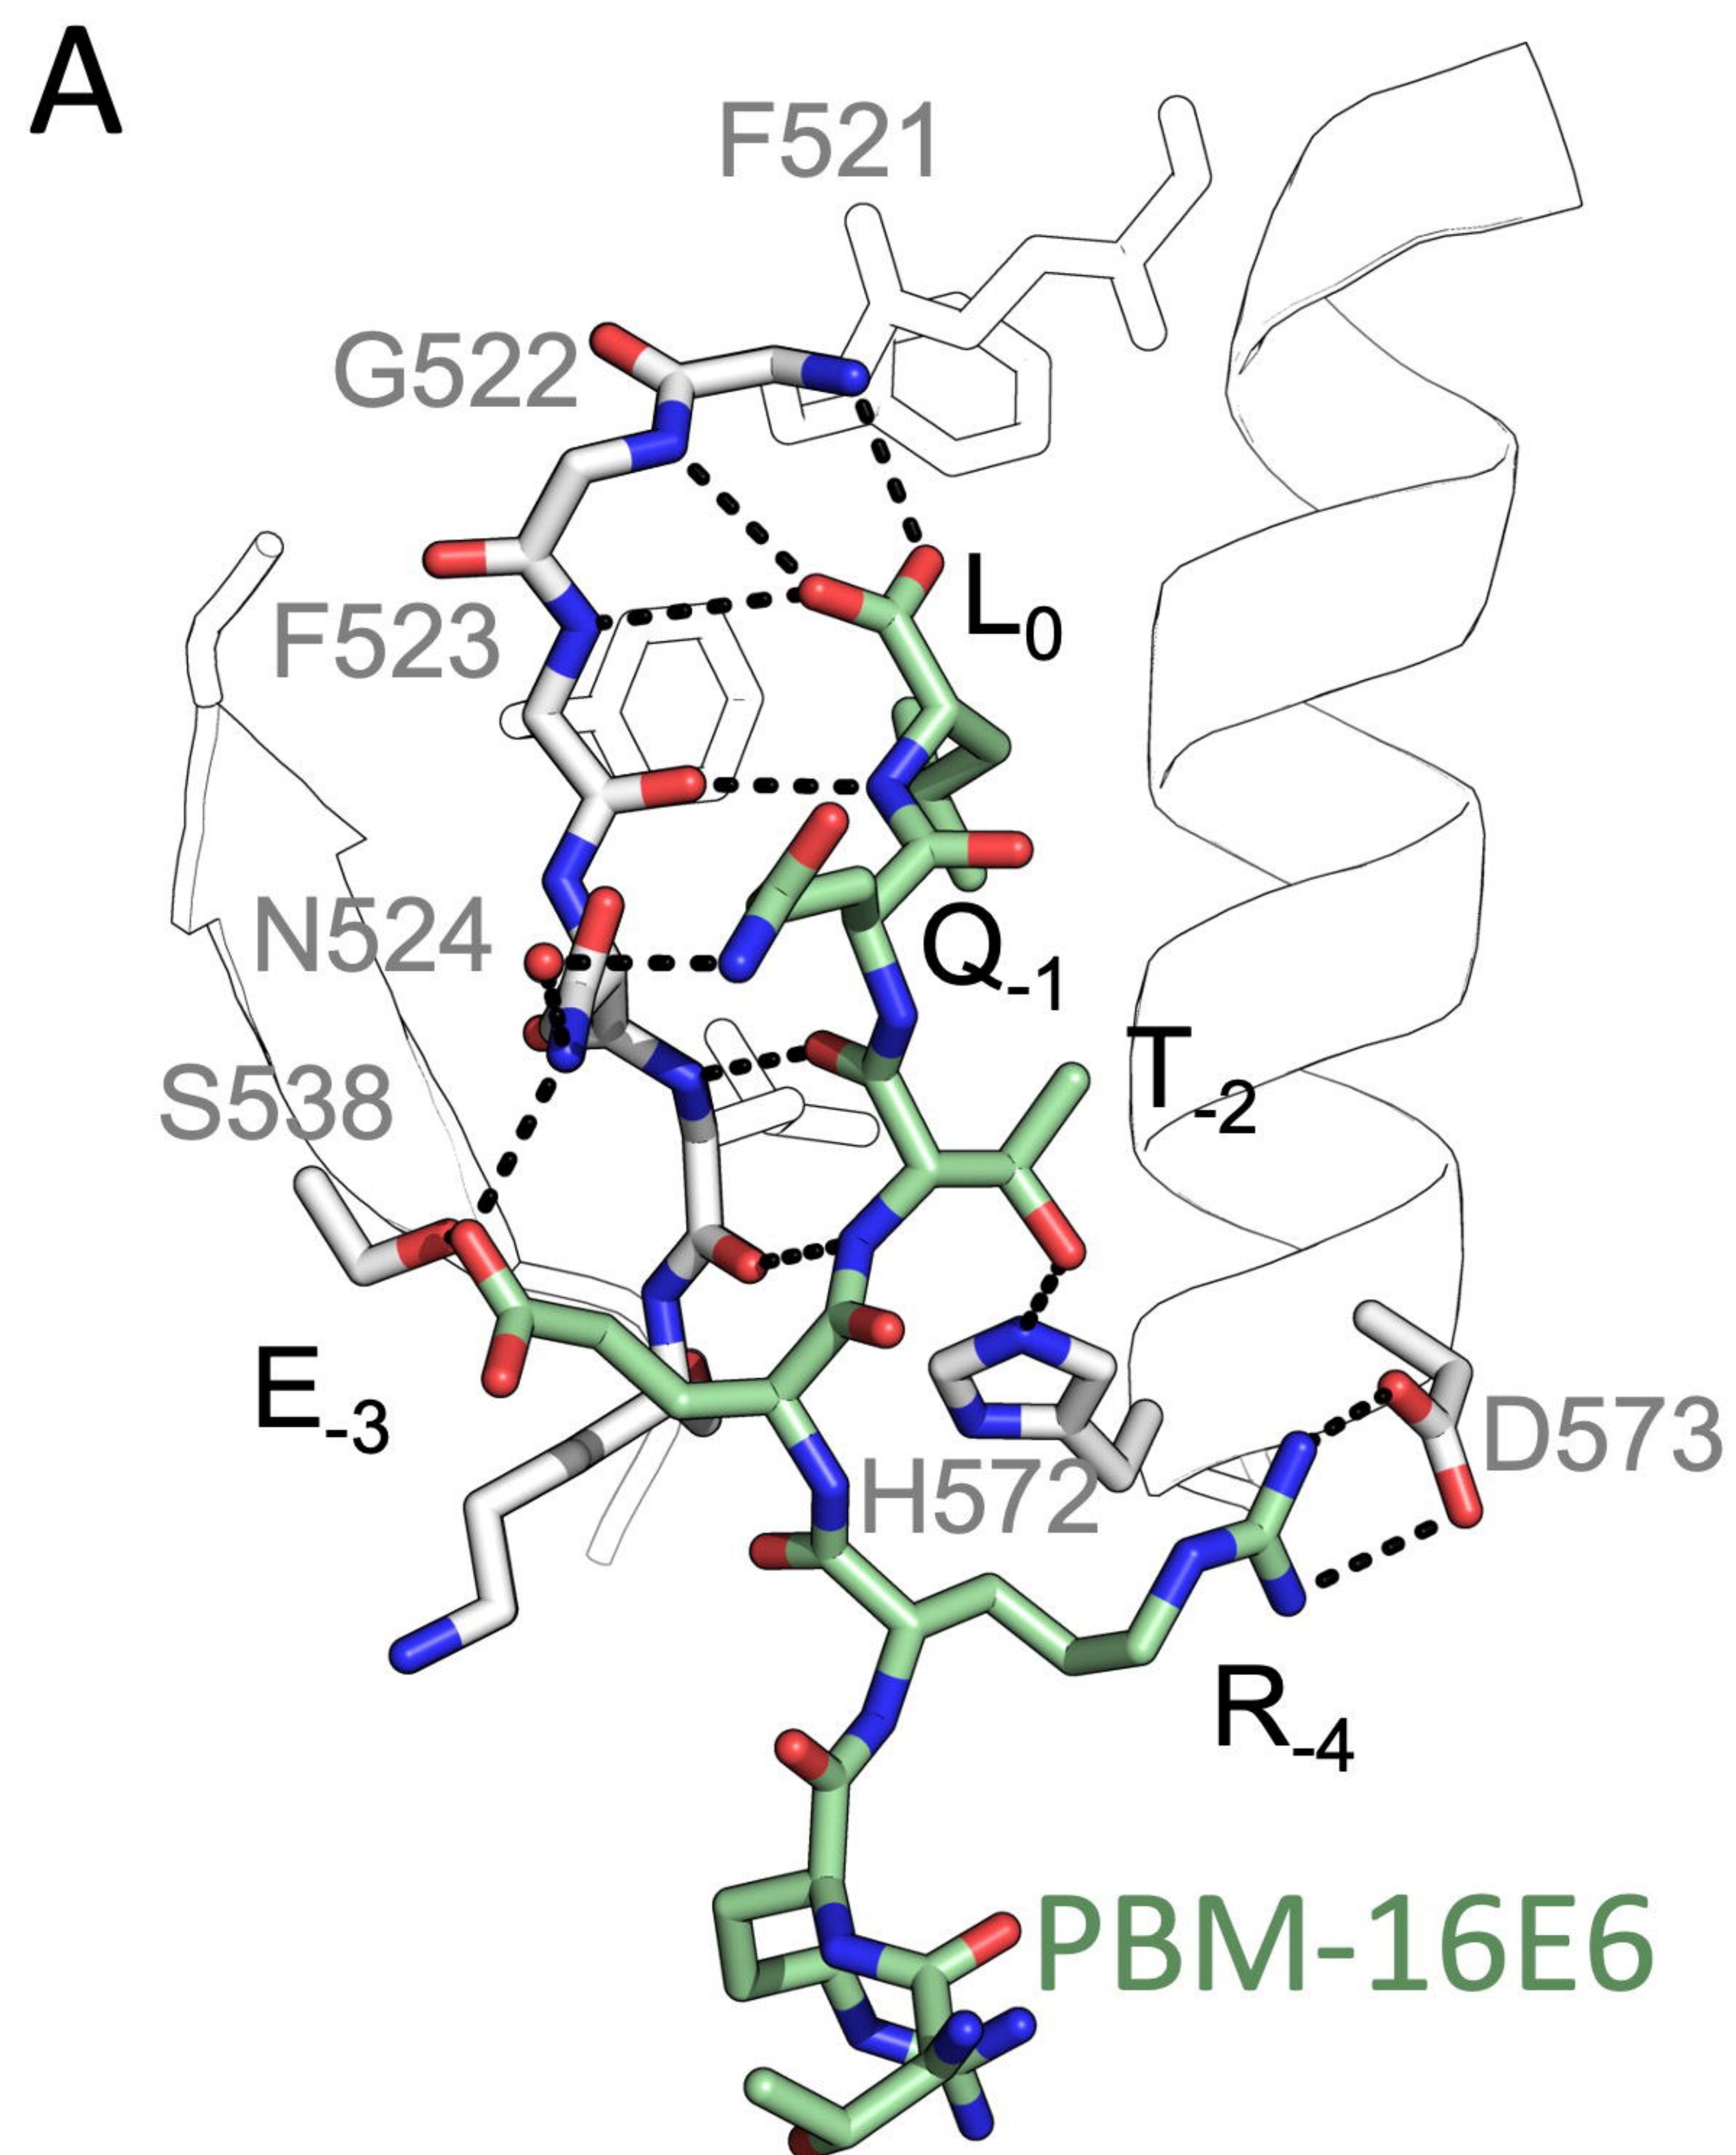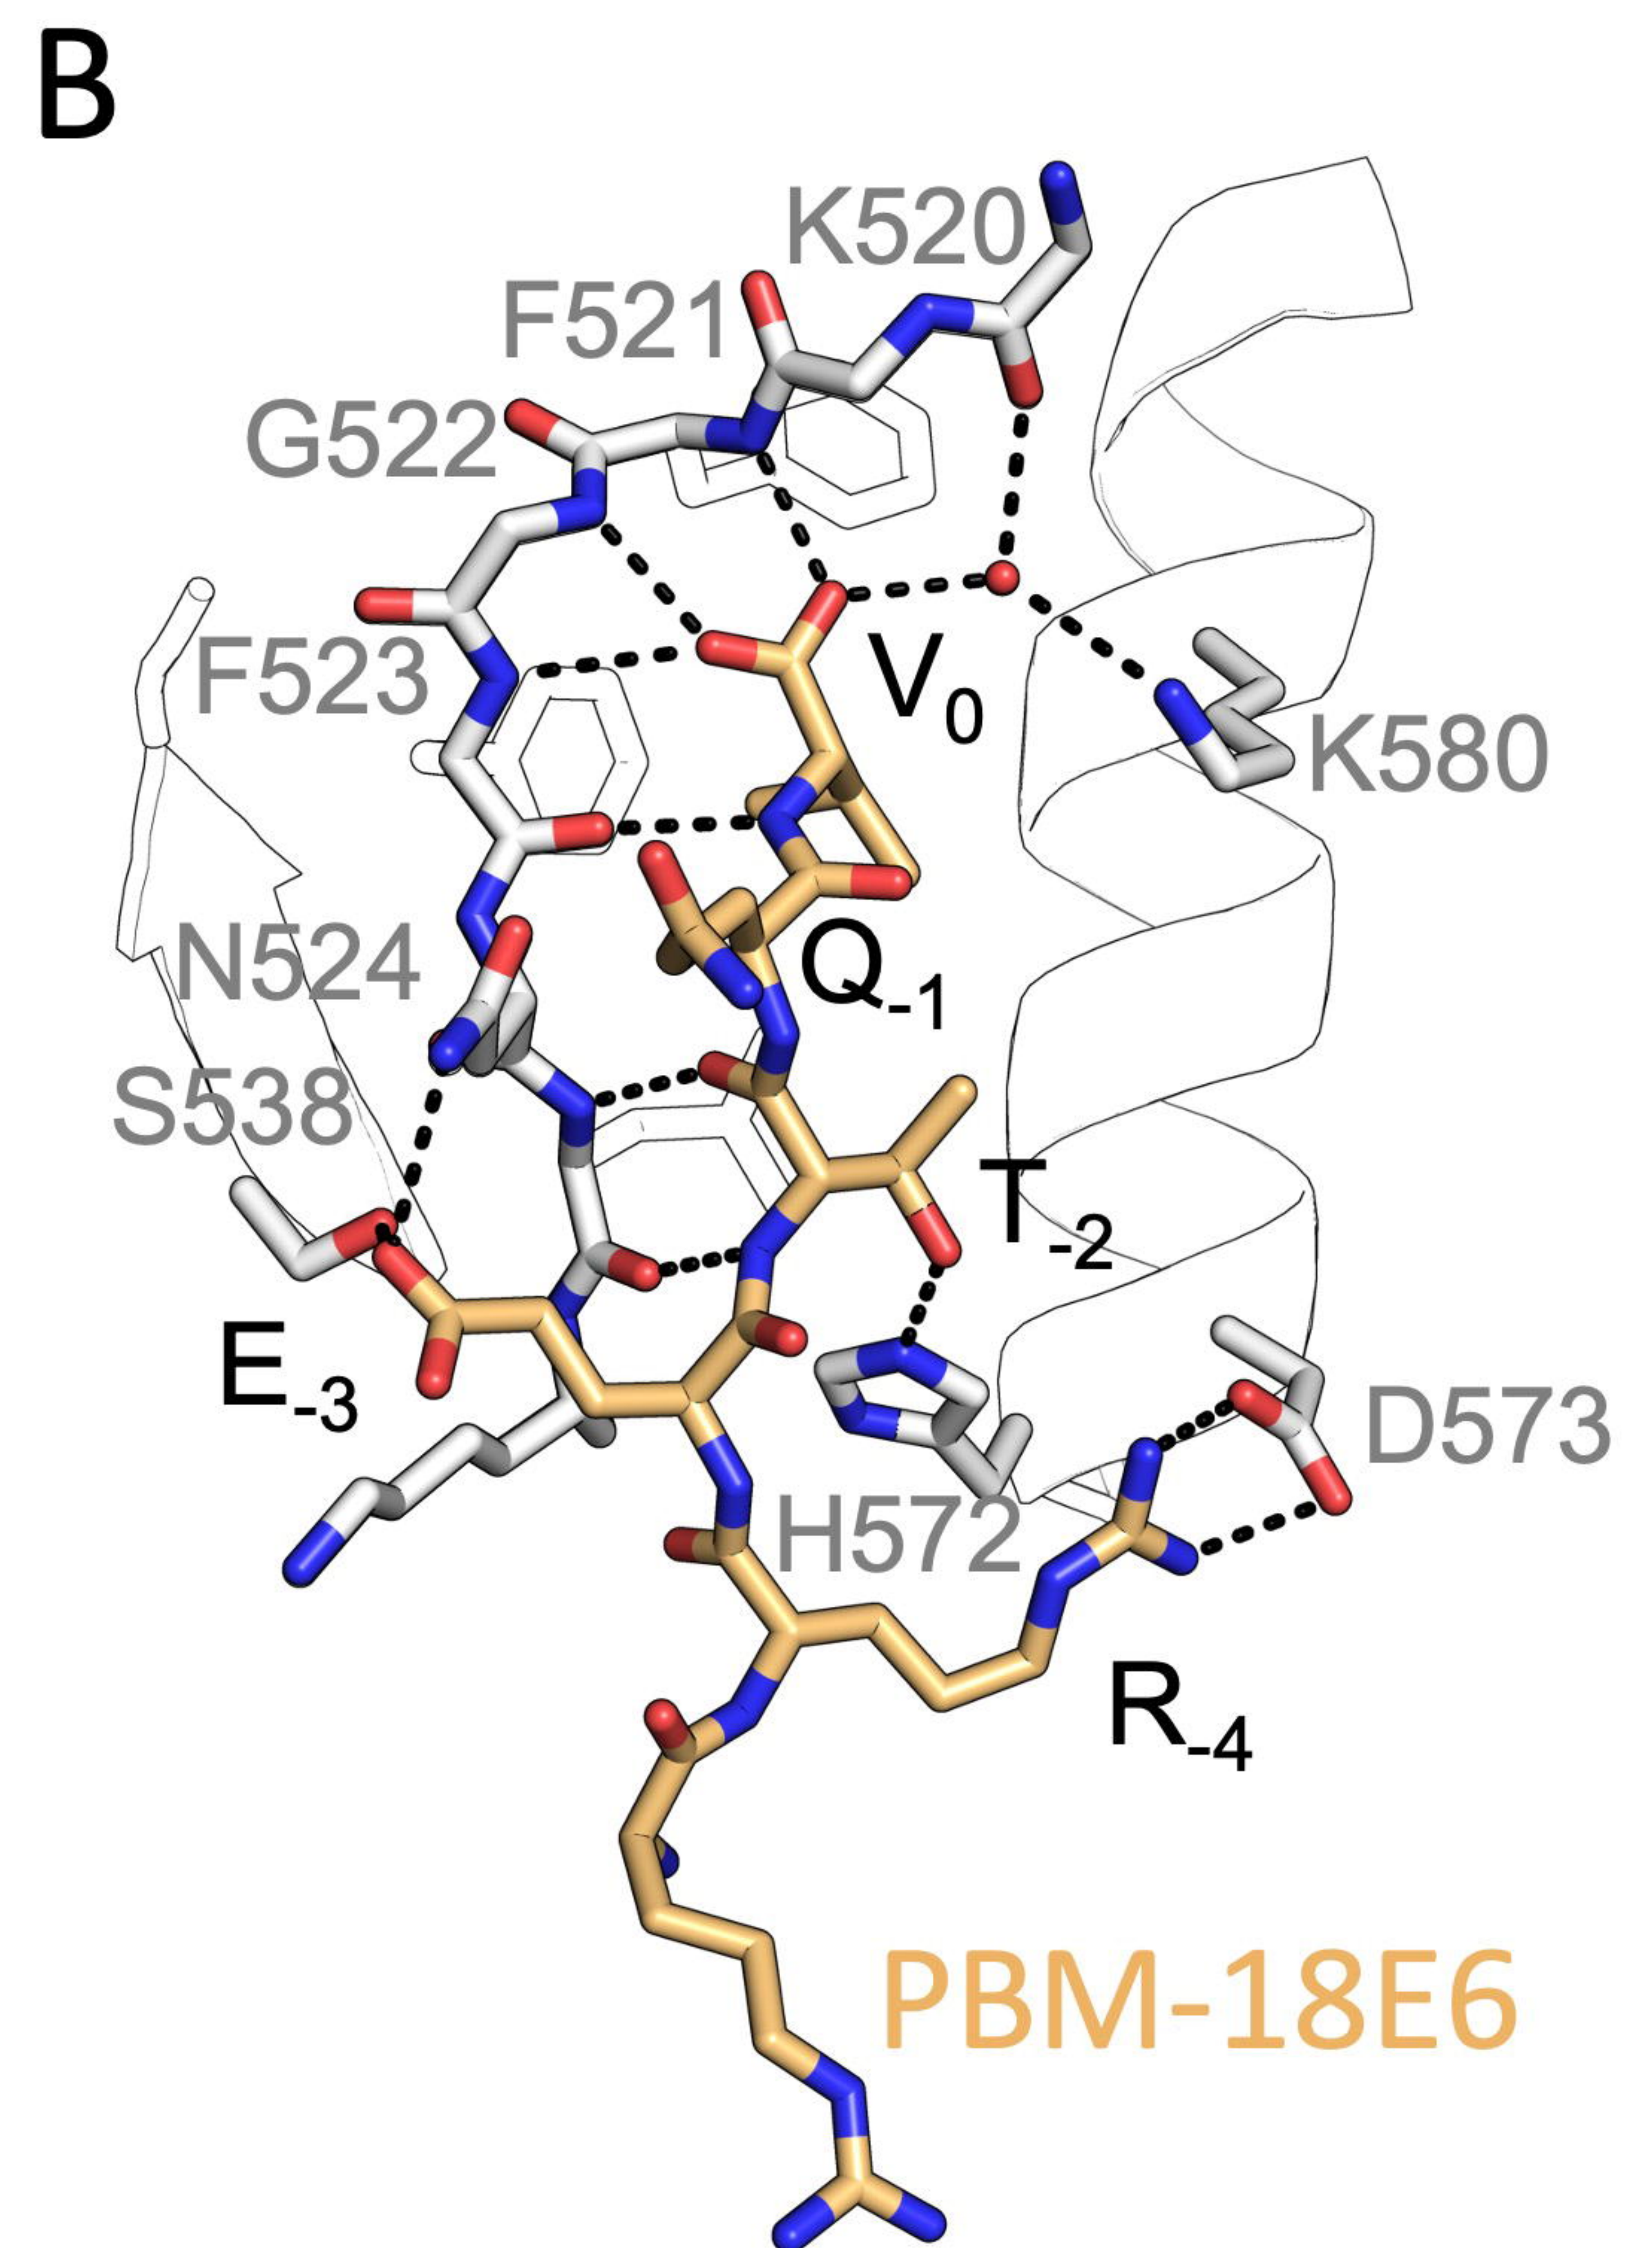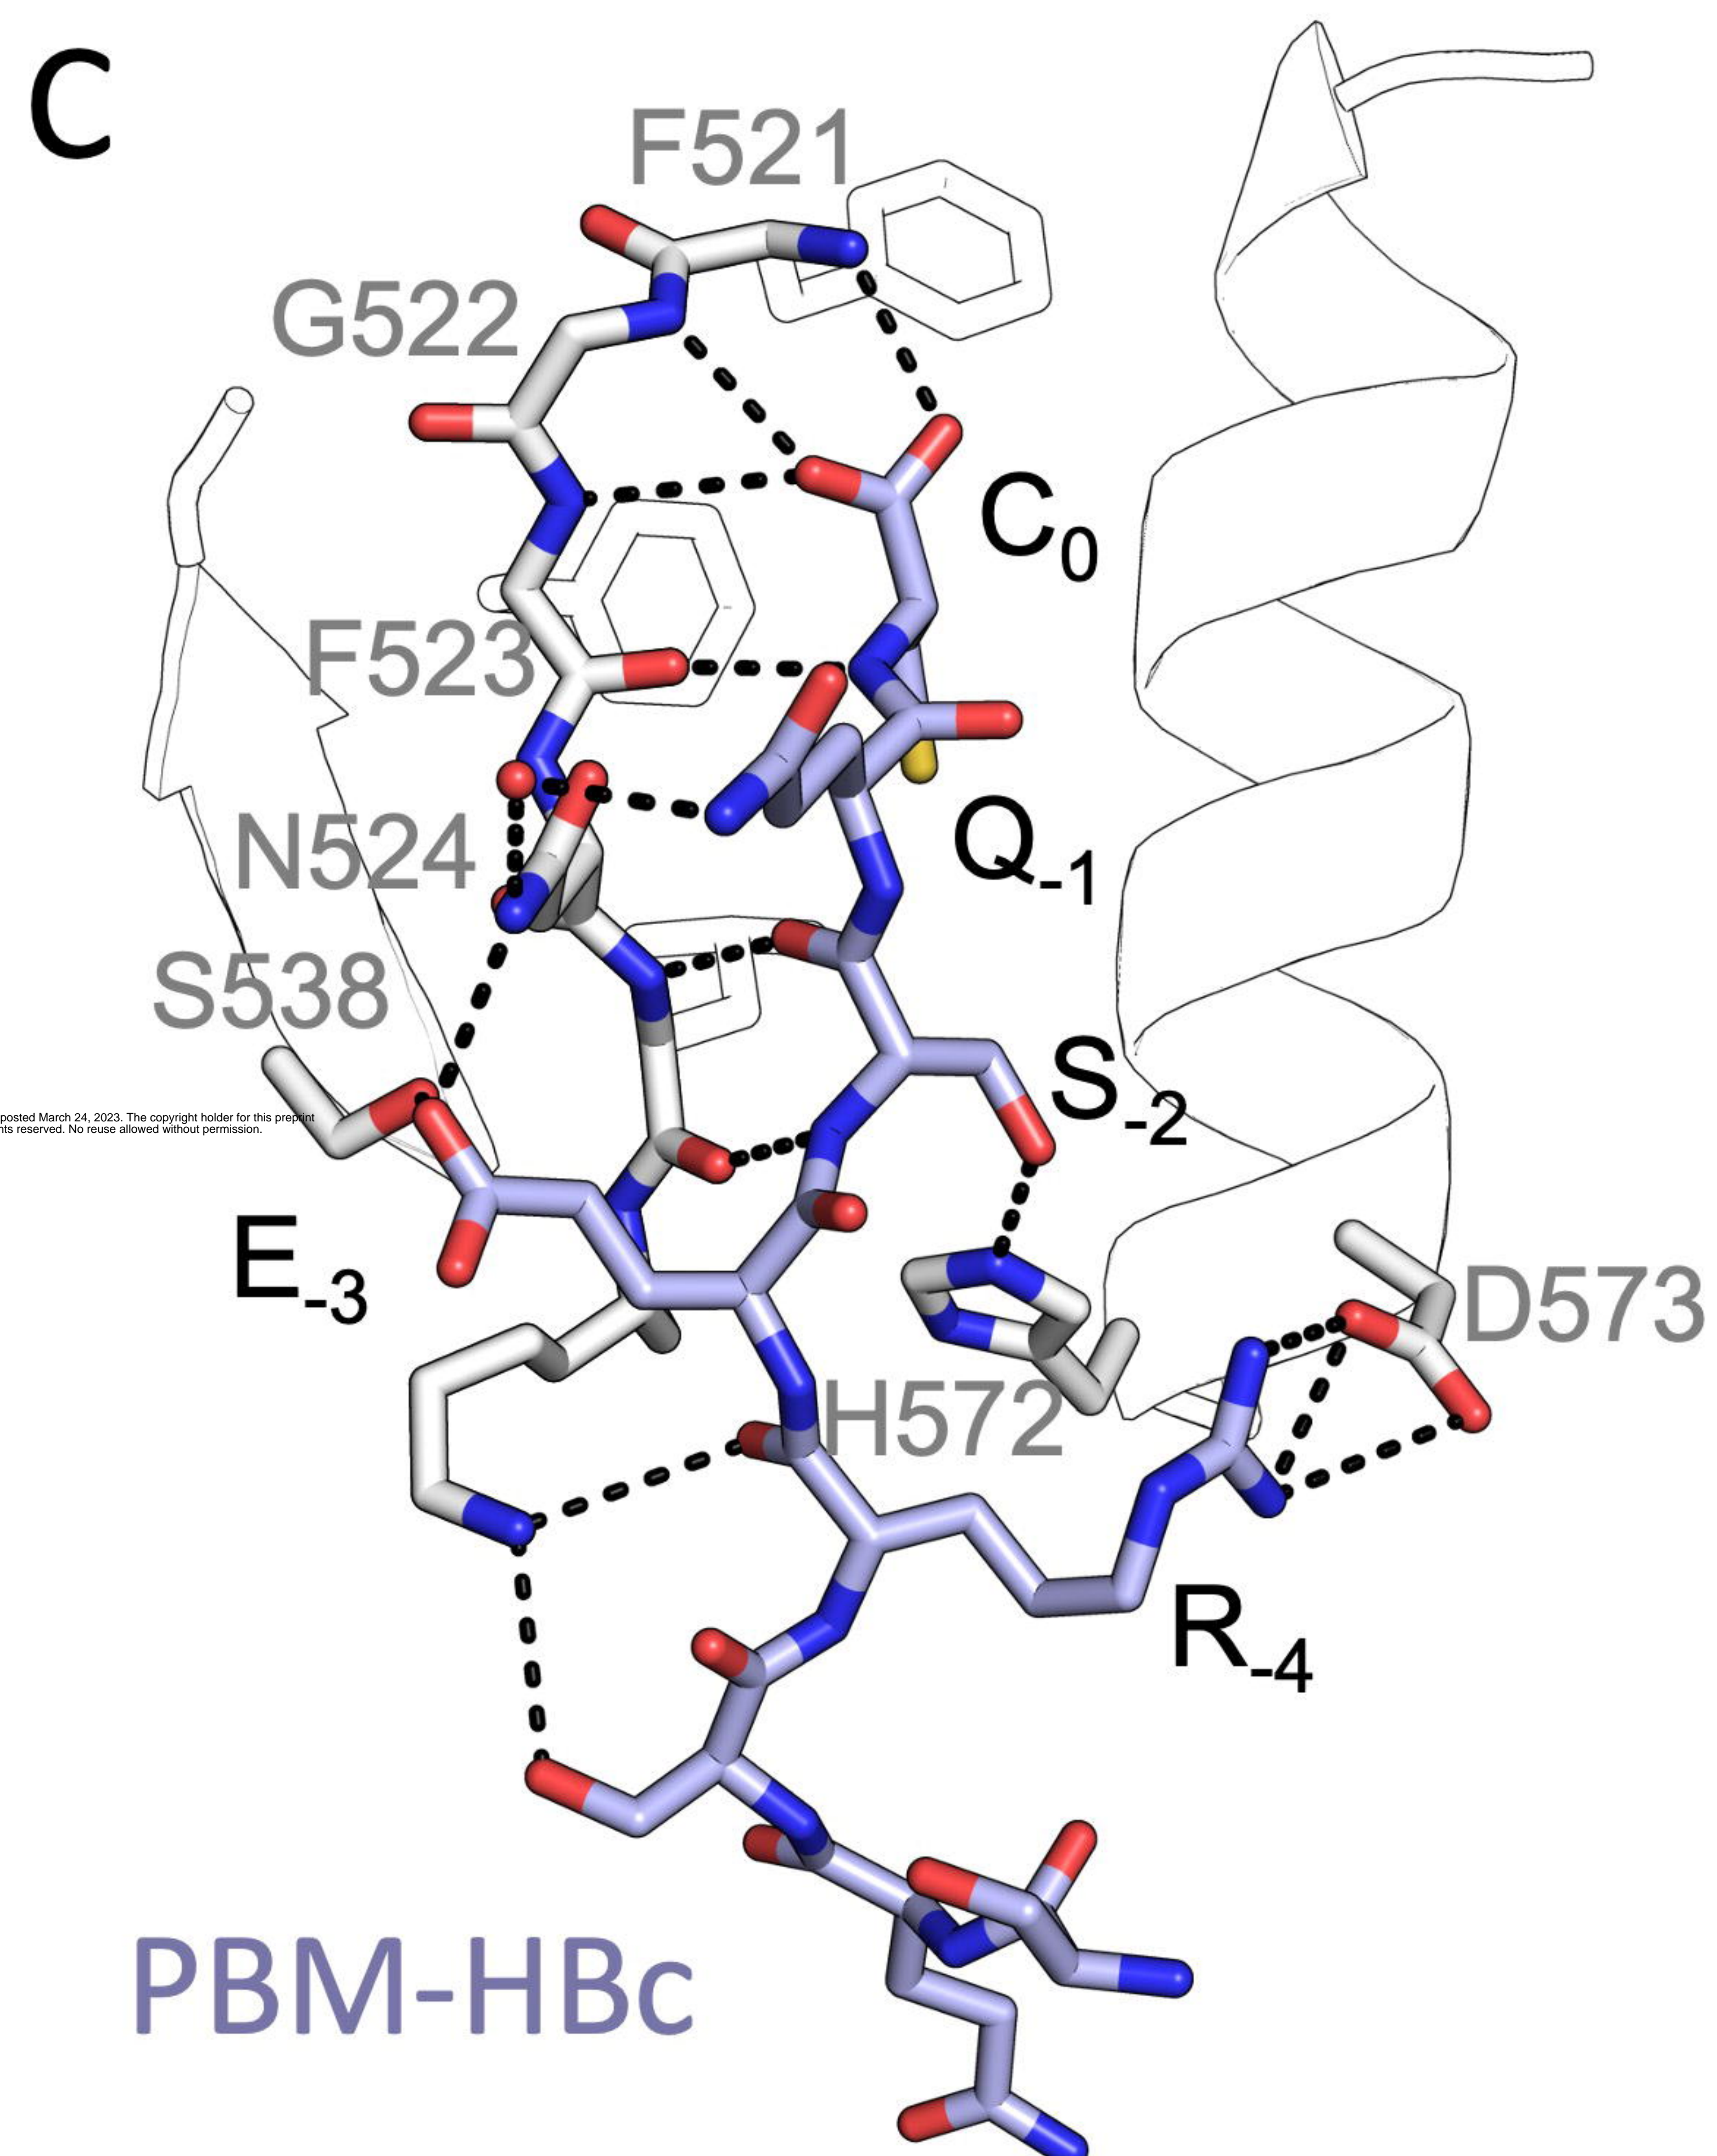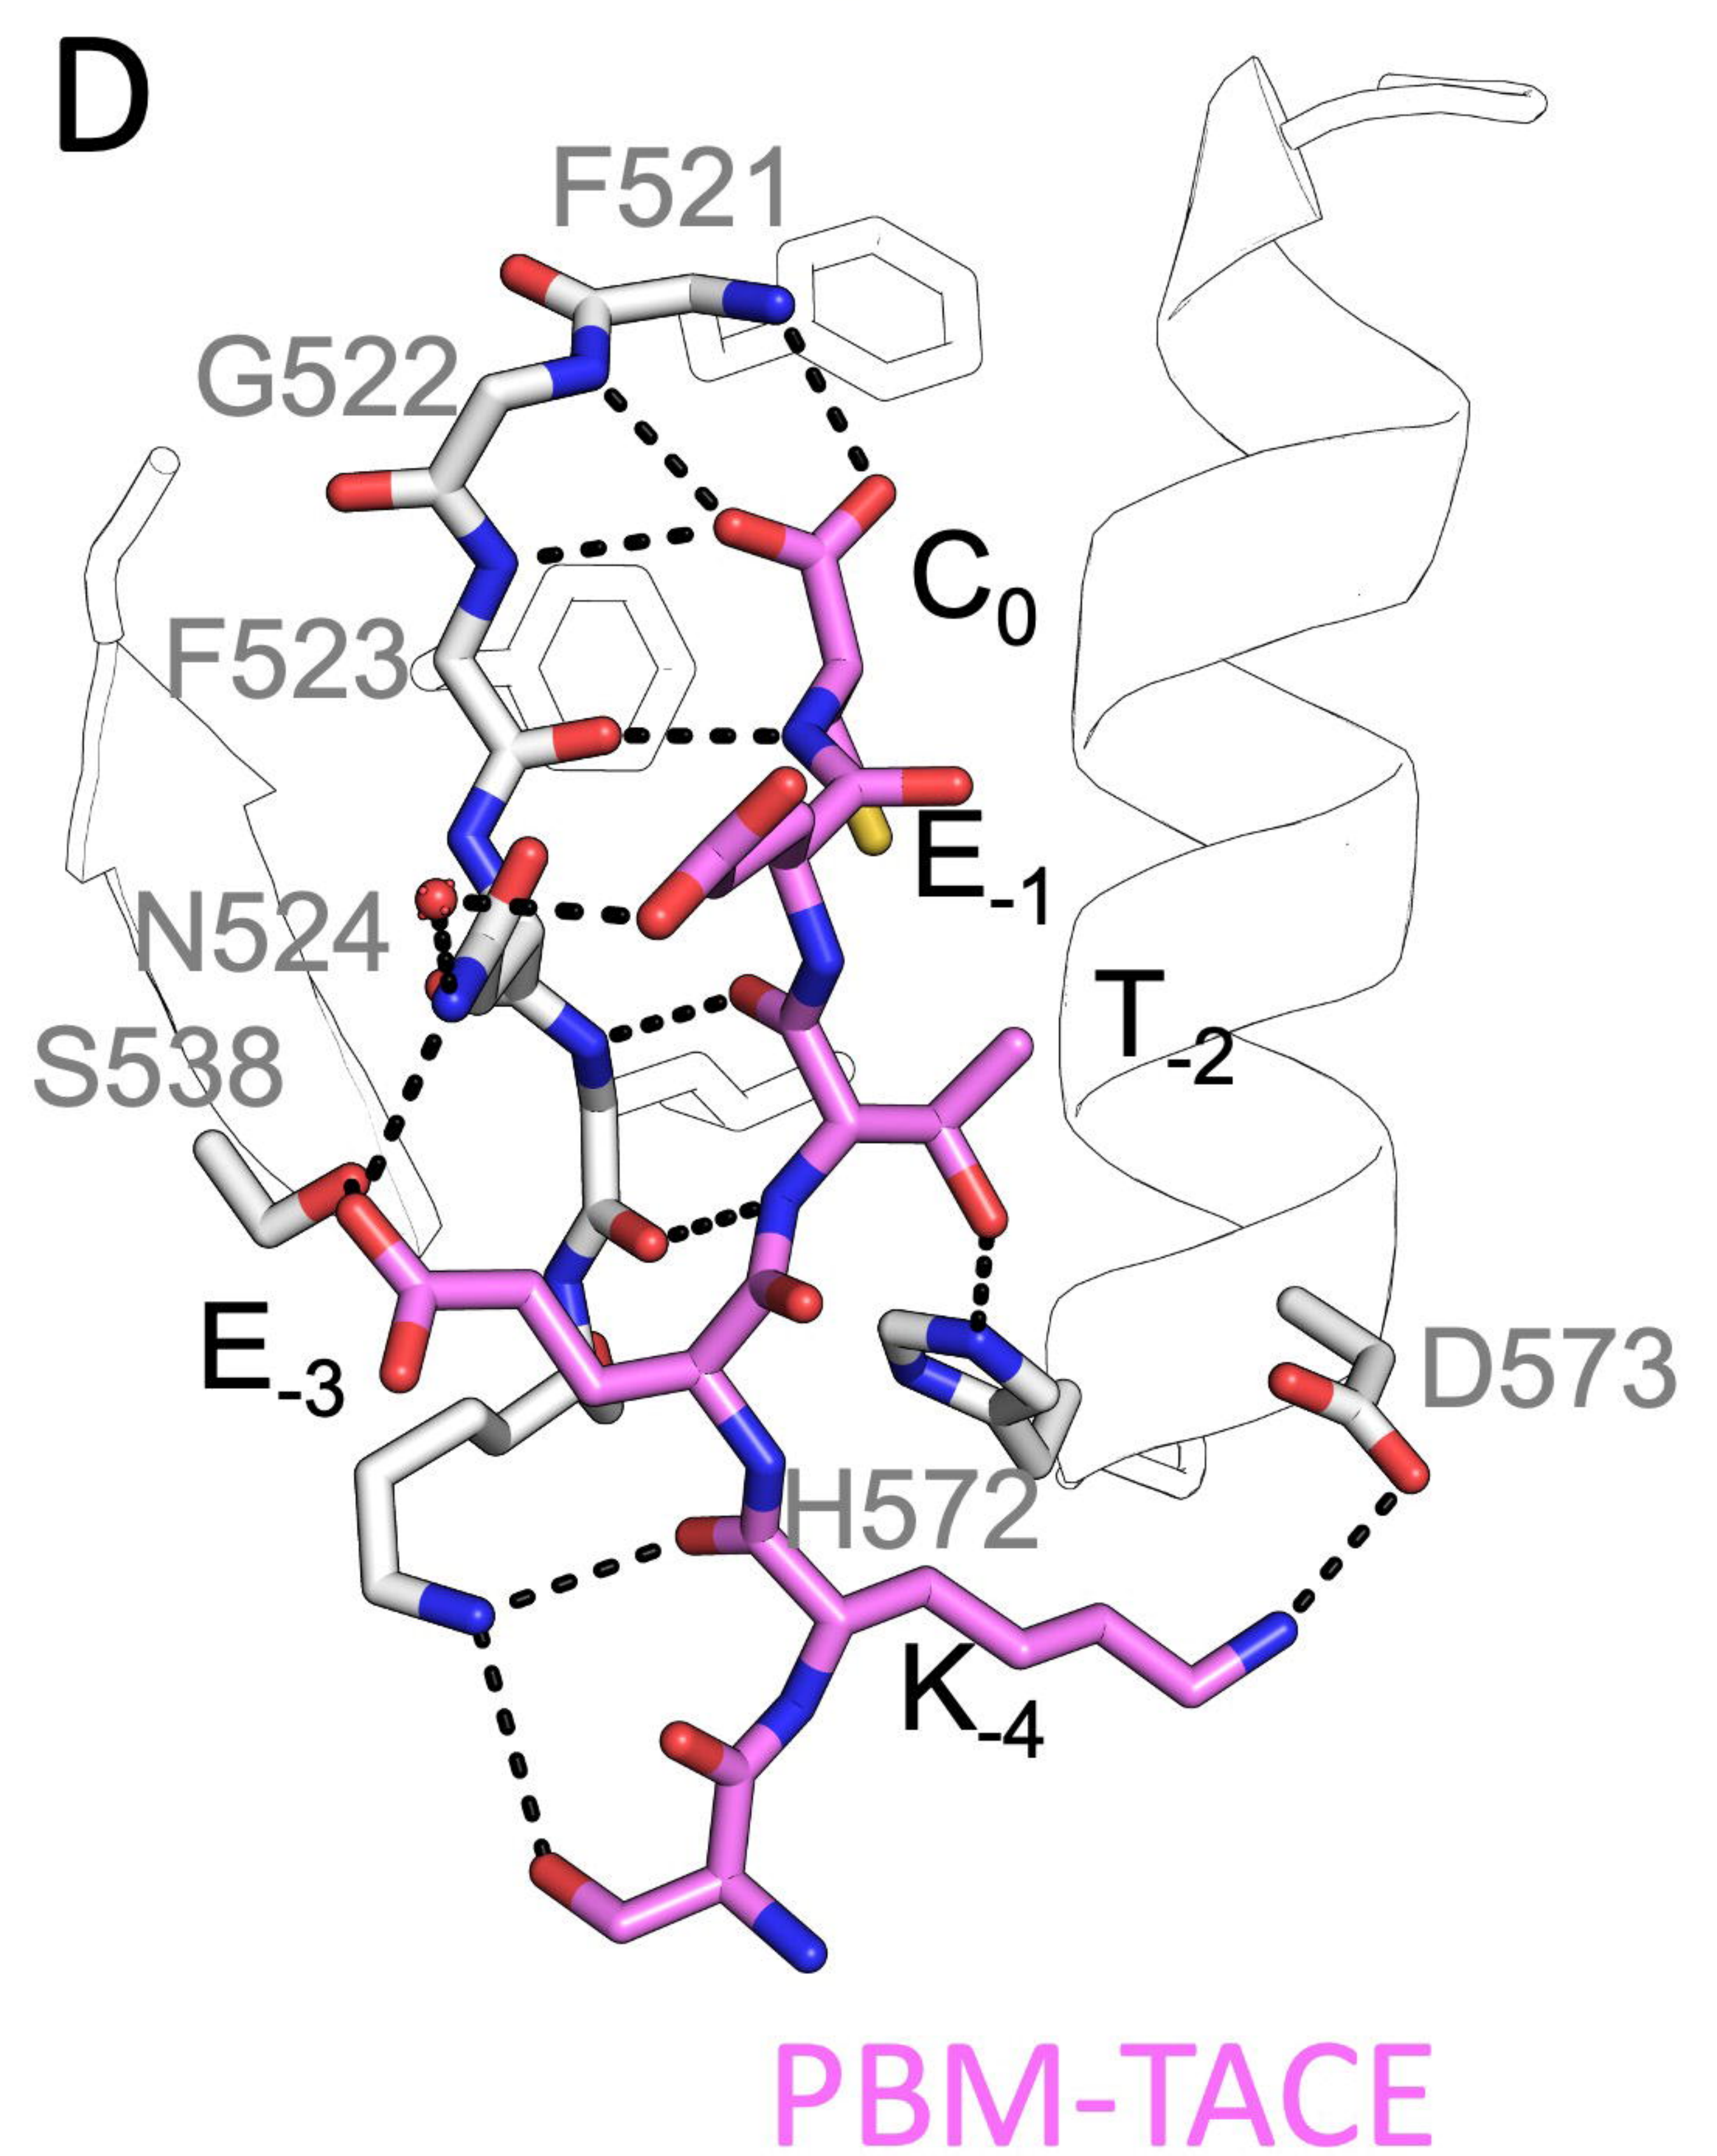

A

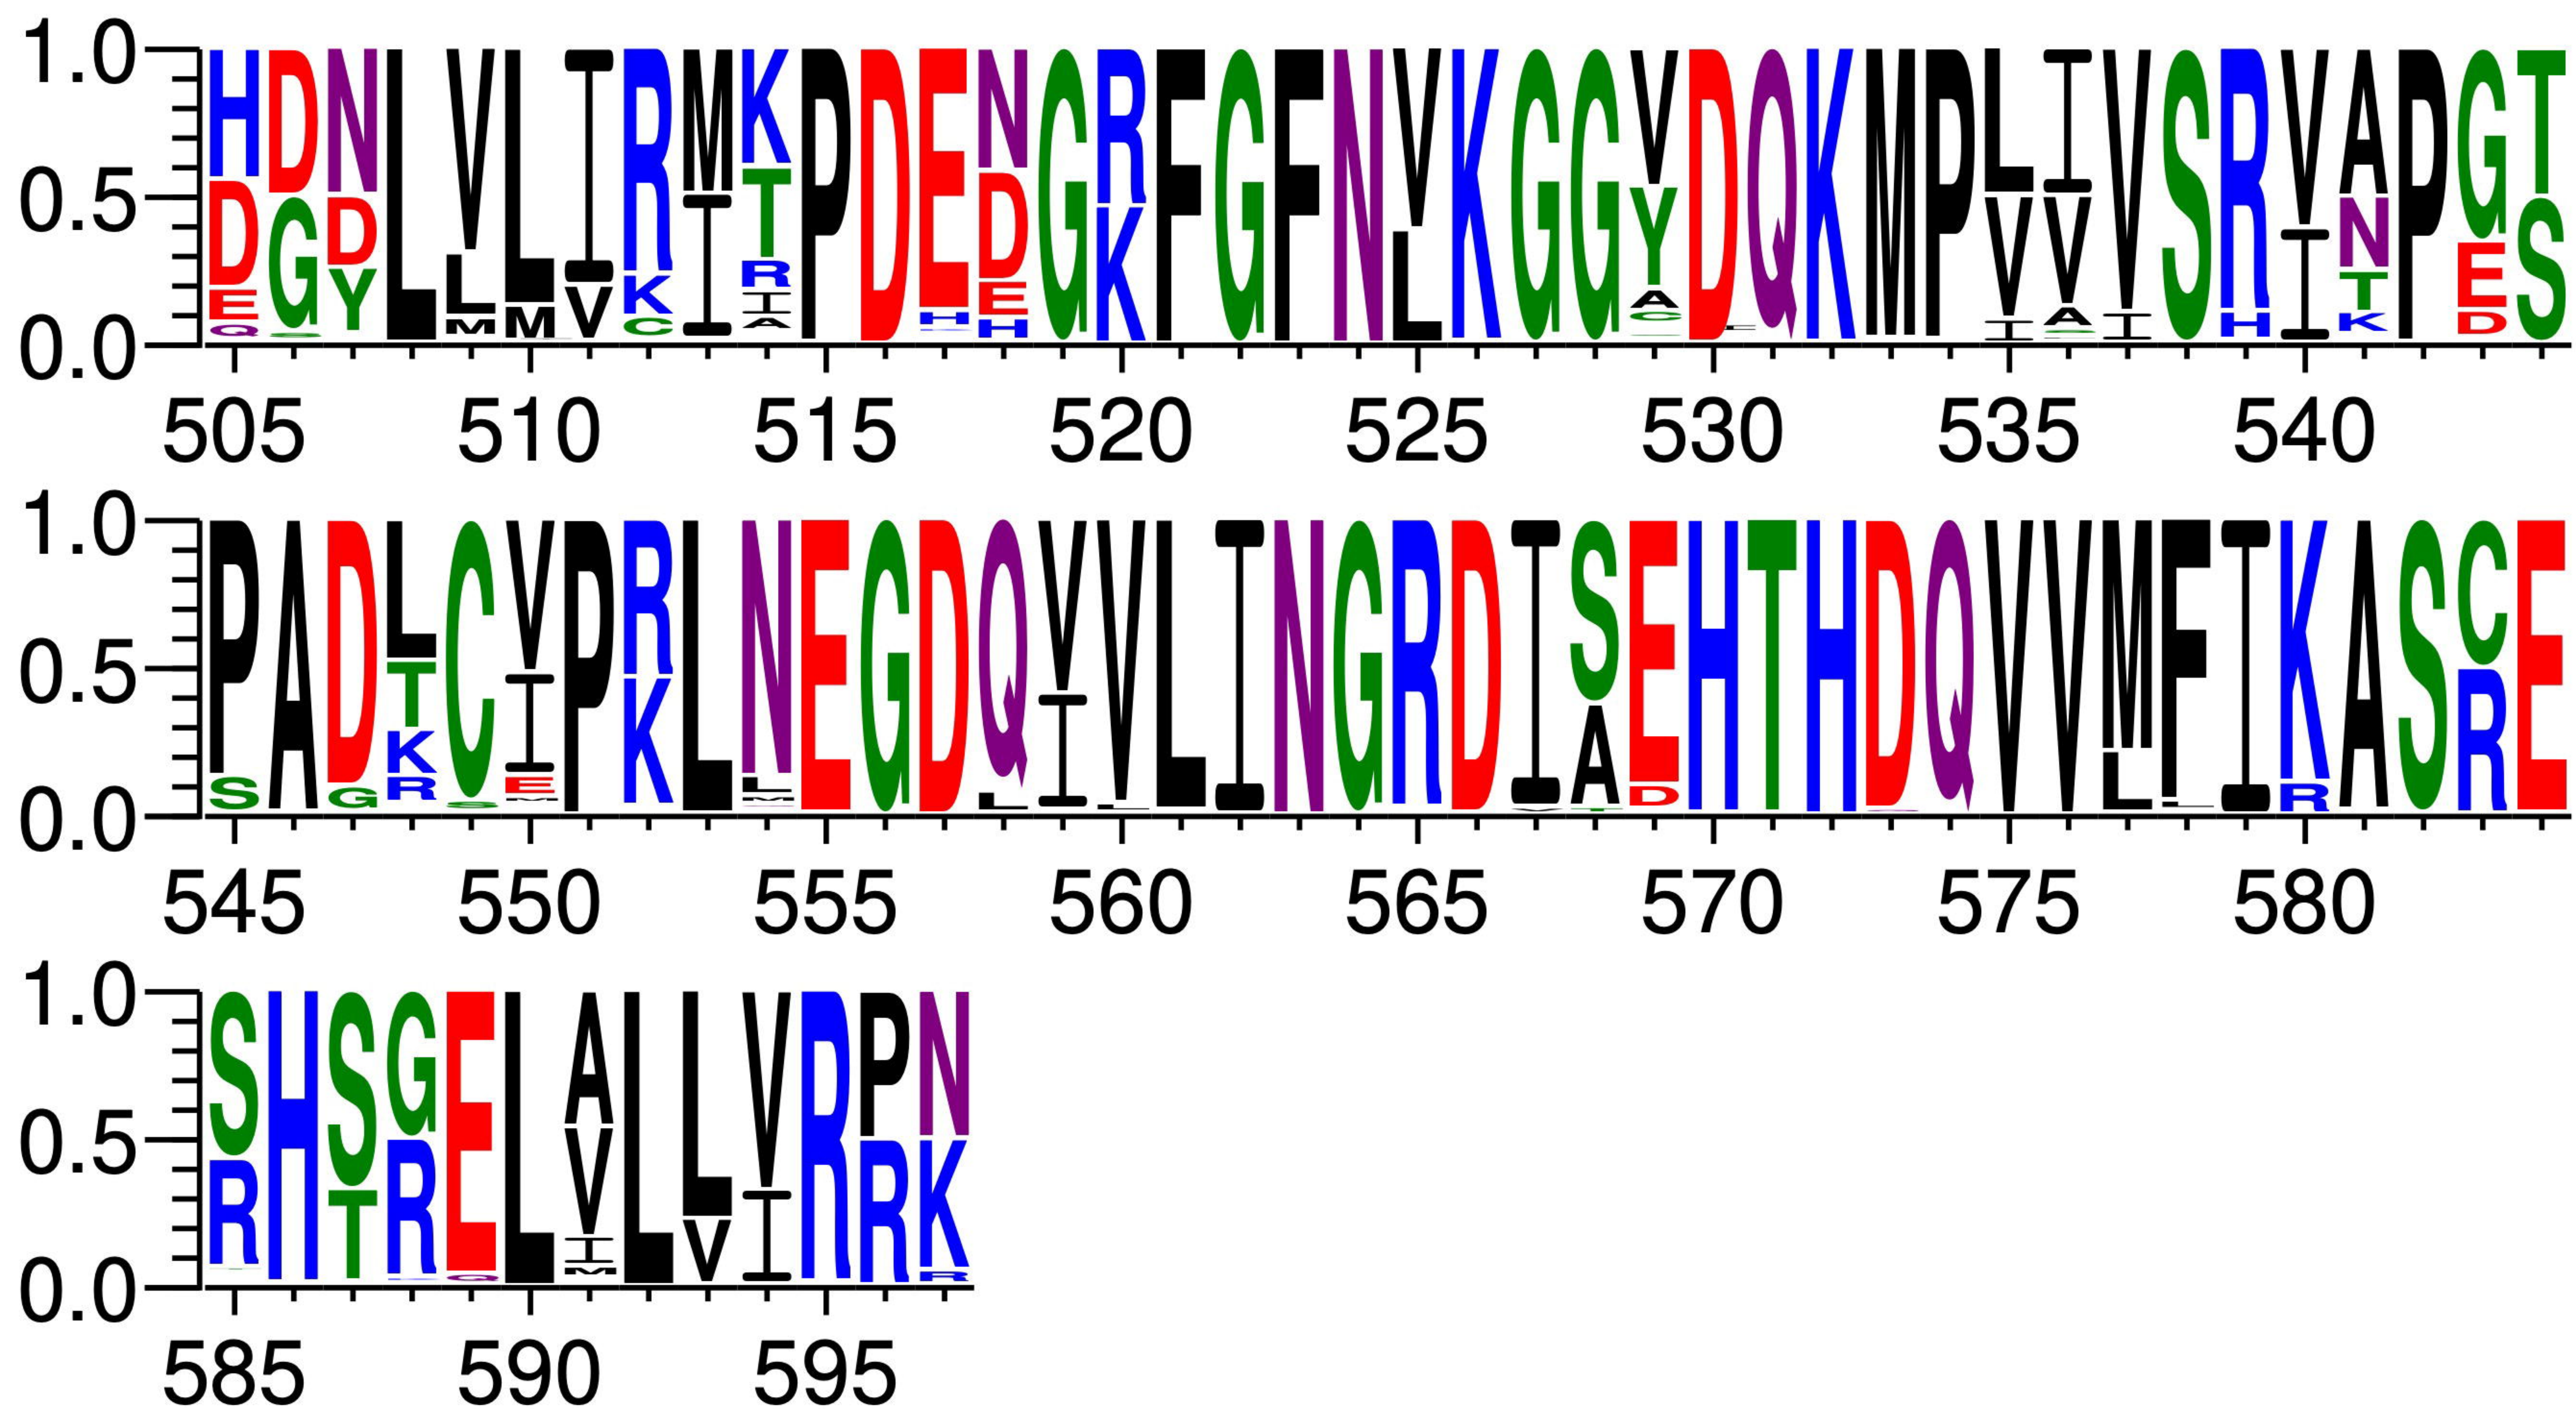

B

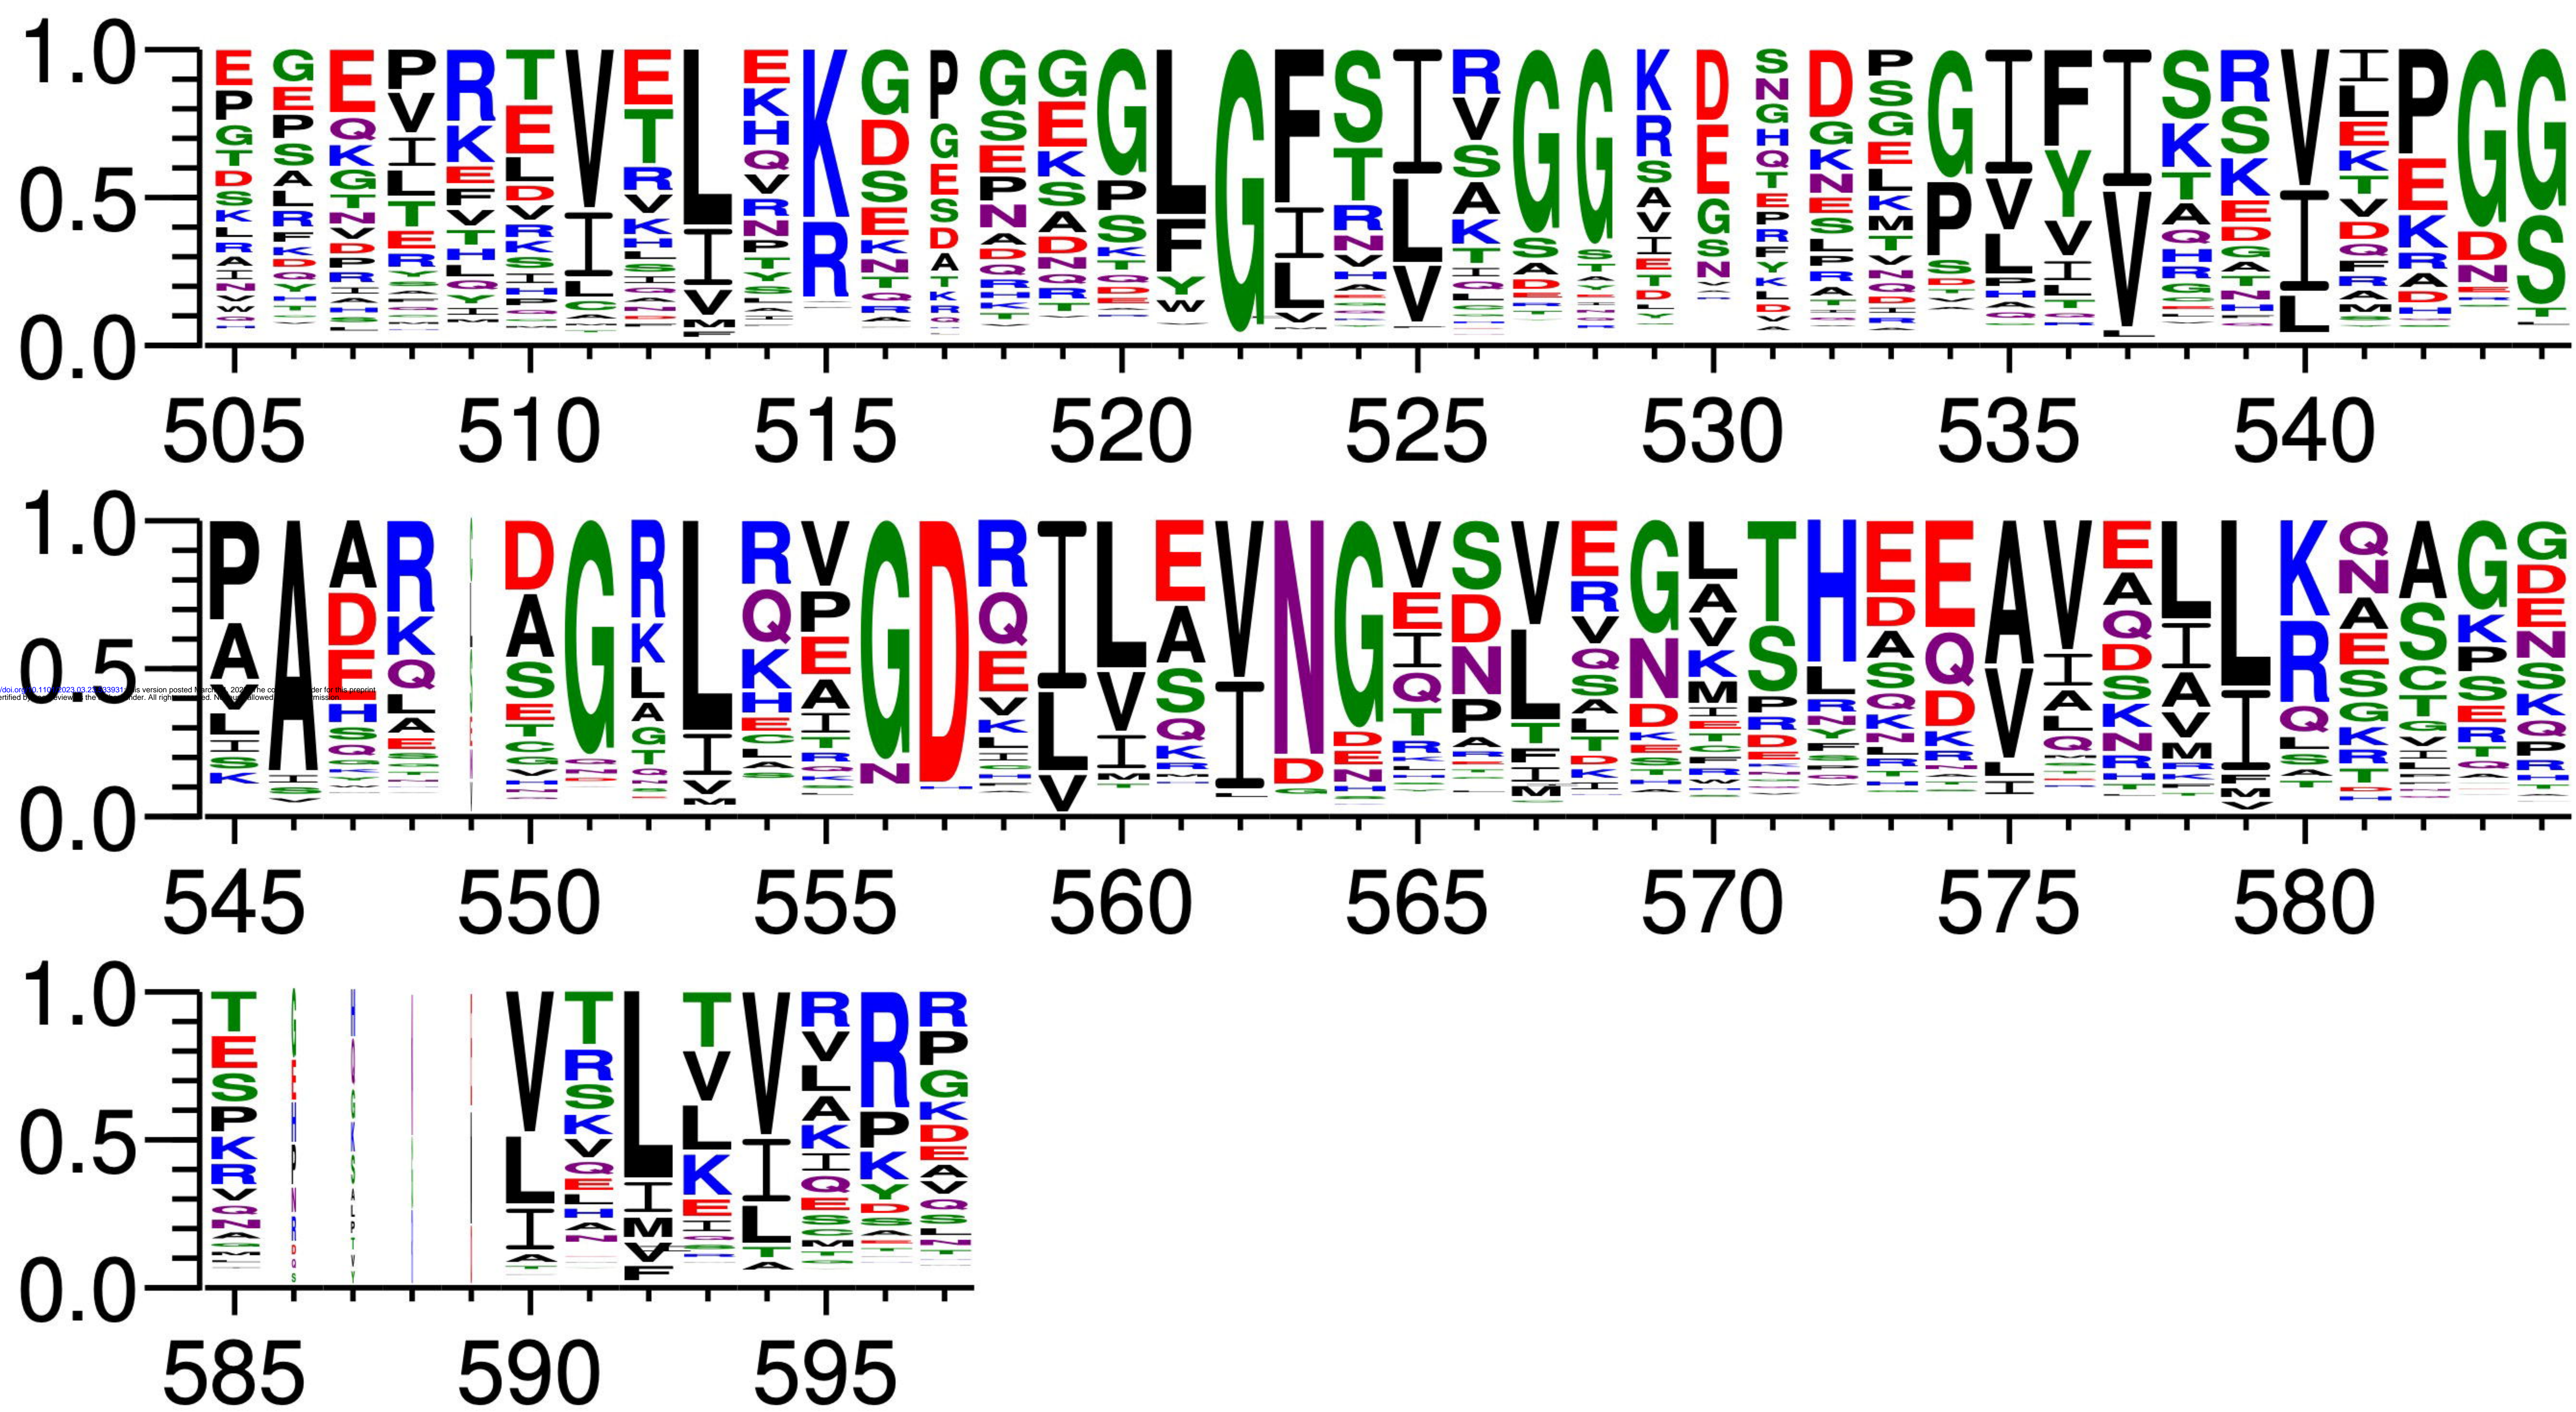

# p38gamma PBM

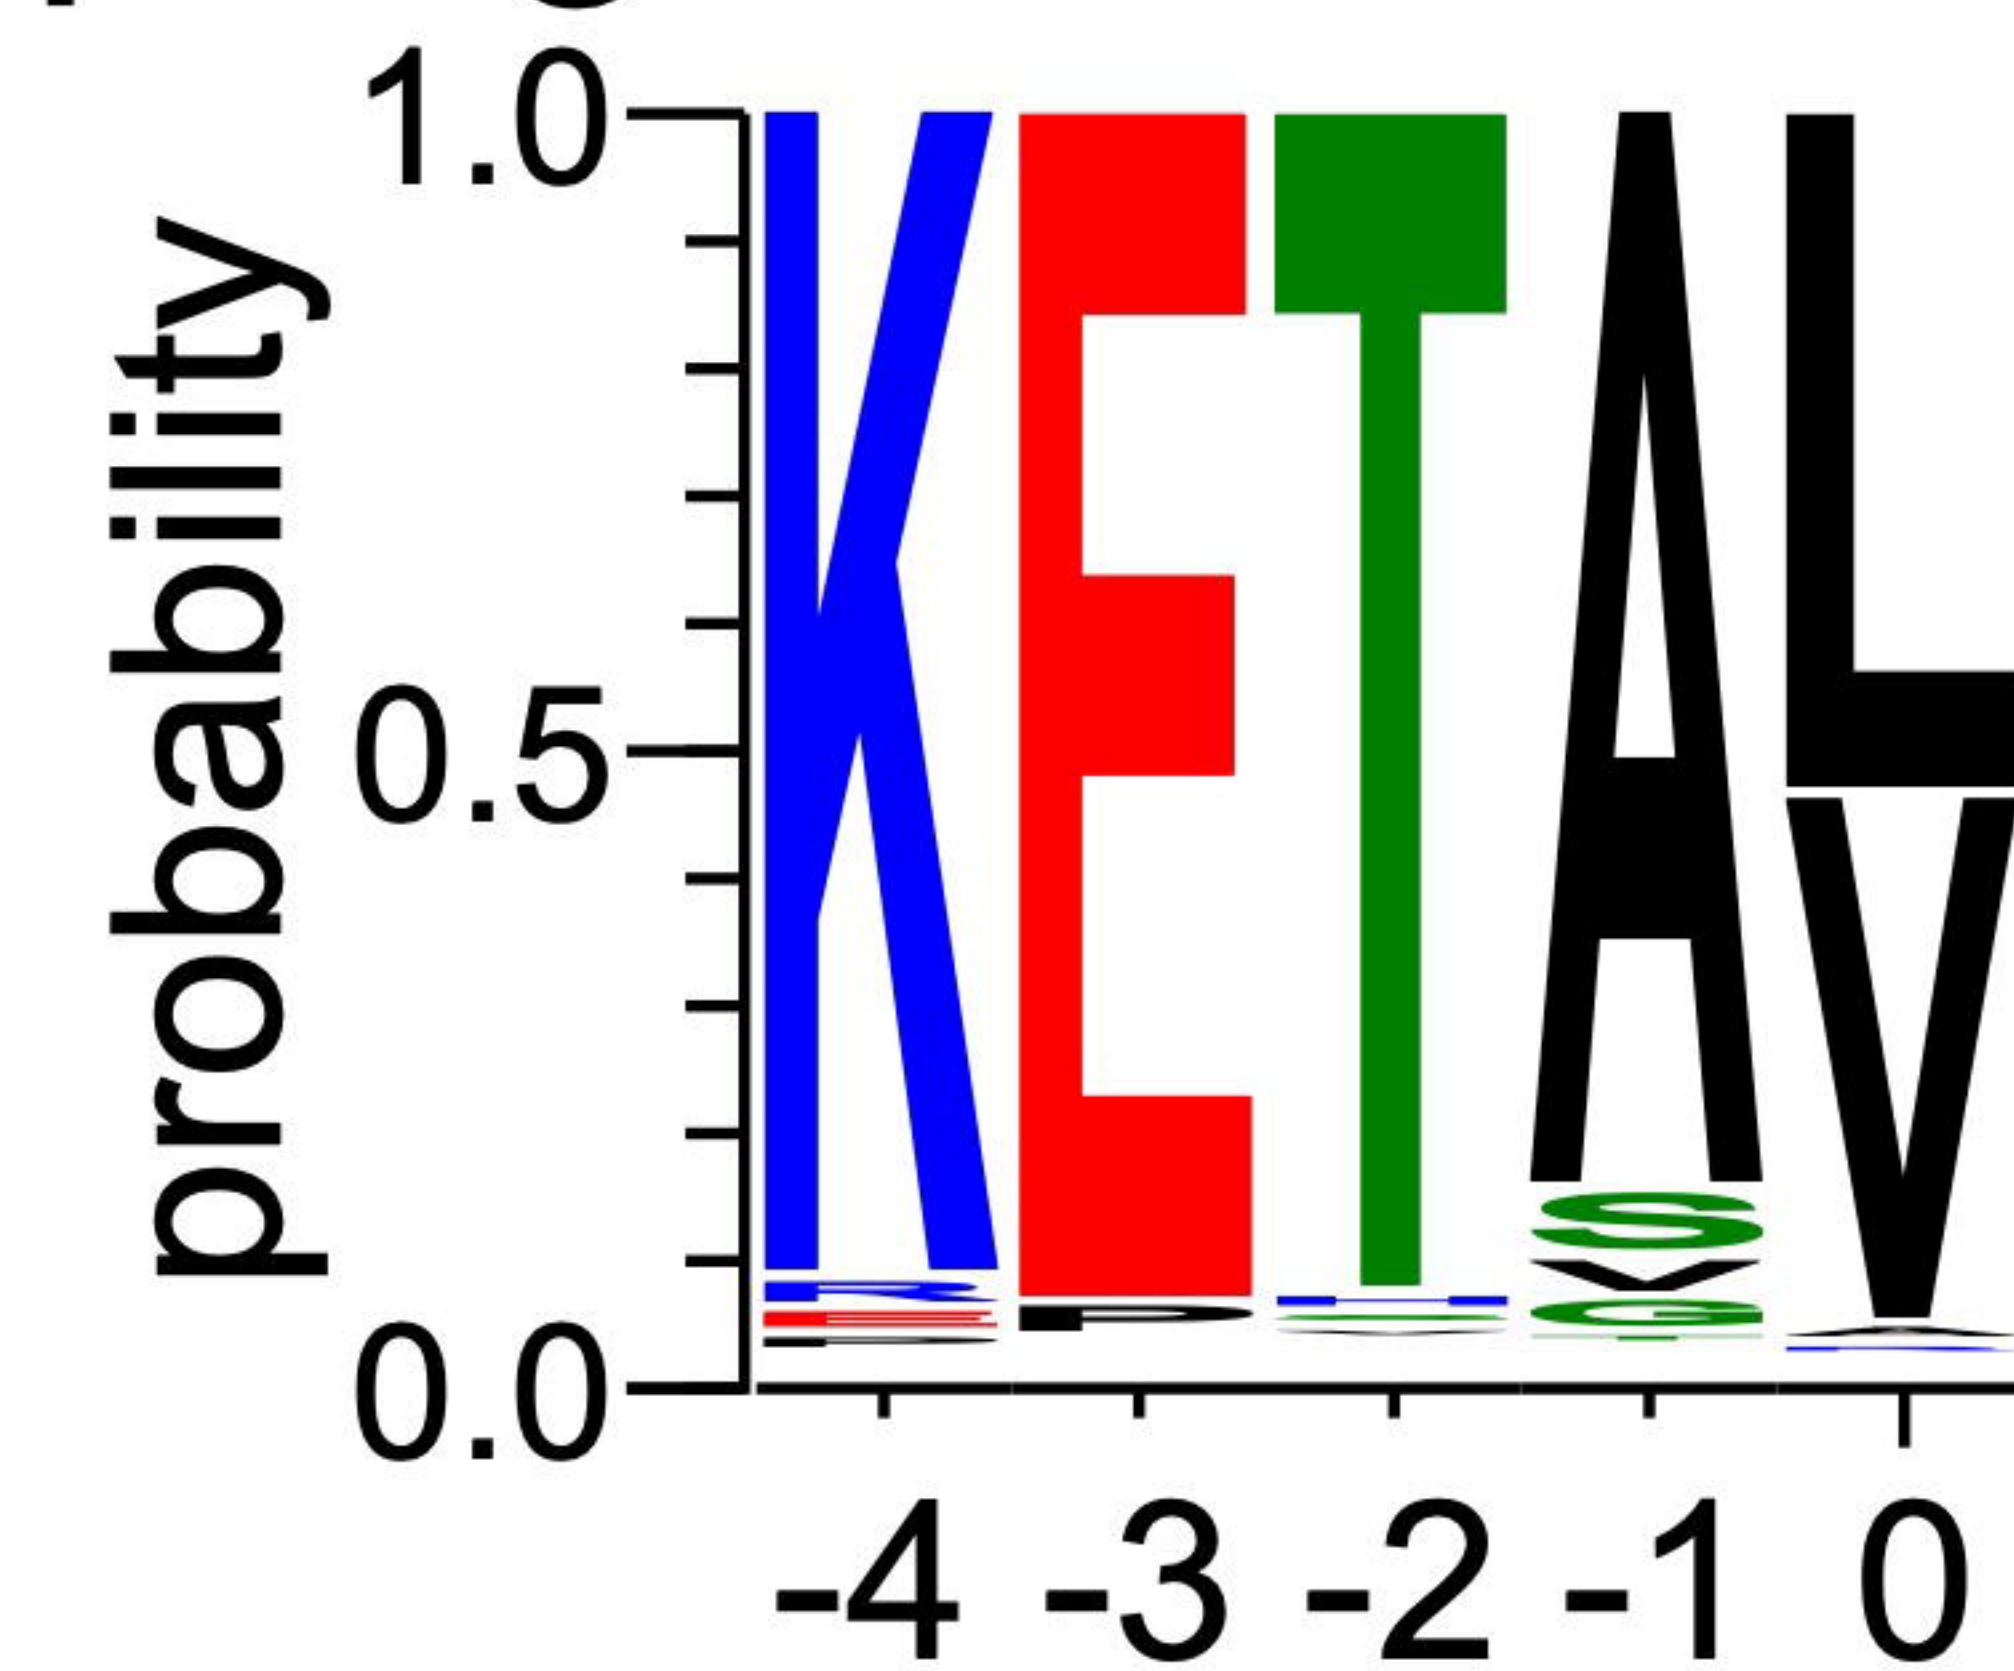

# HPV16 E6 PBM

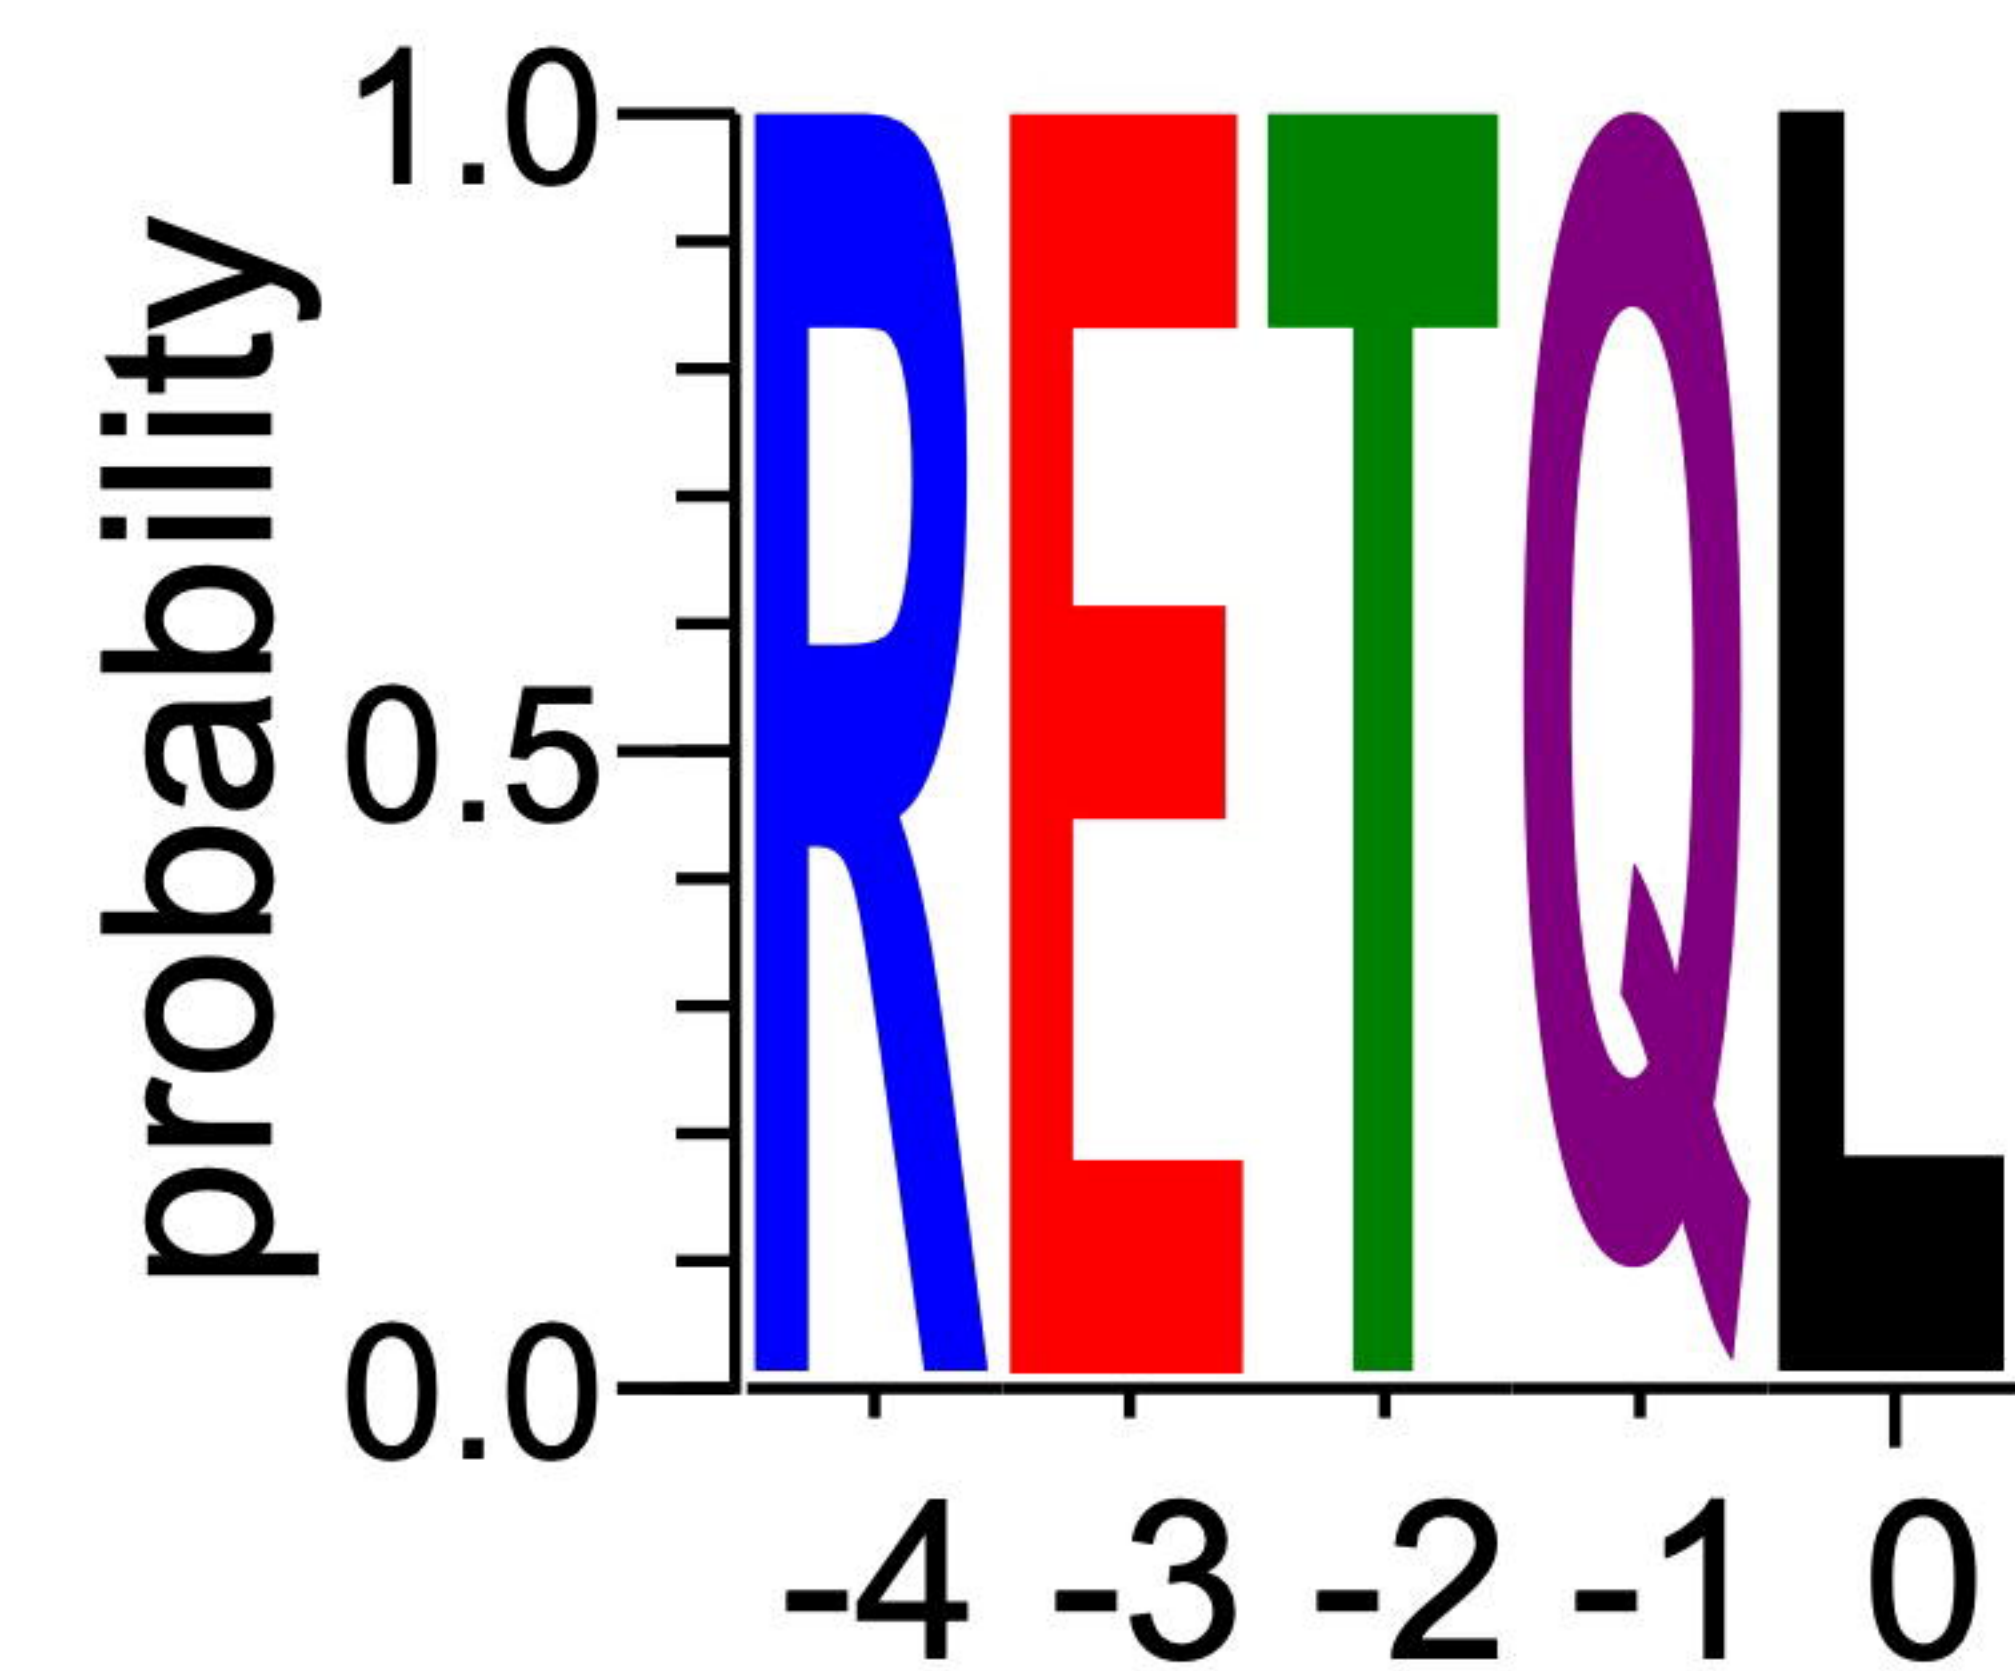

# HPV18 E6 PBM

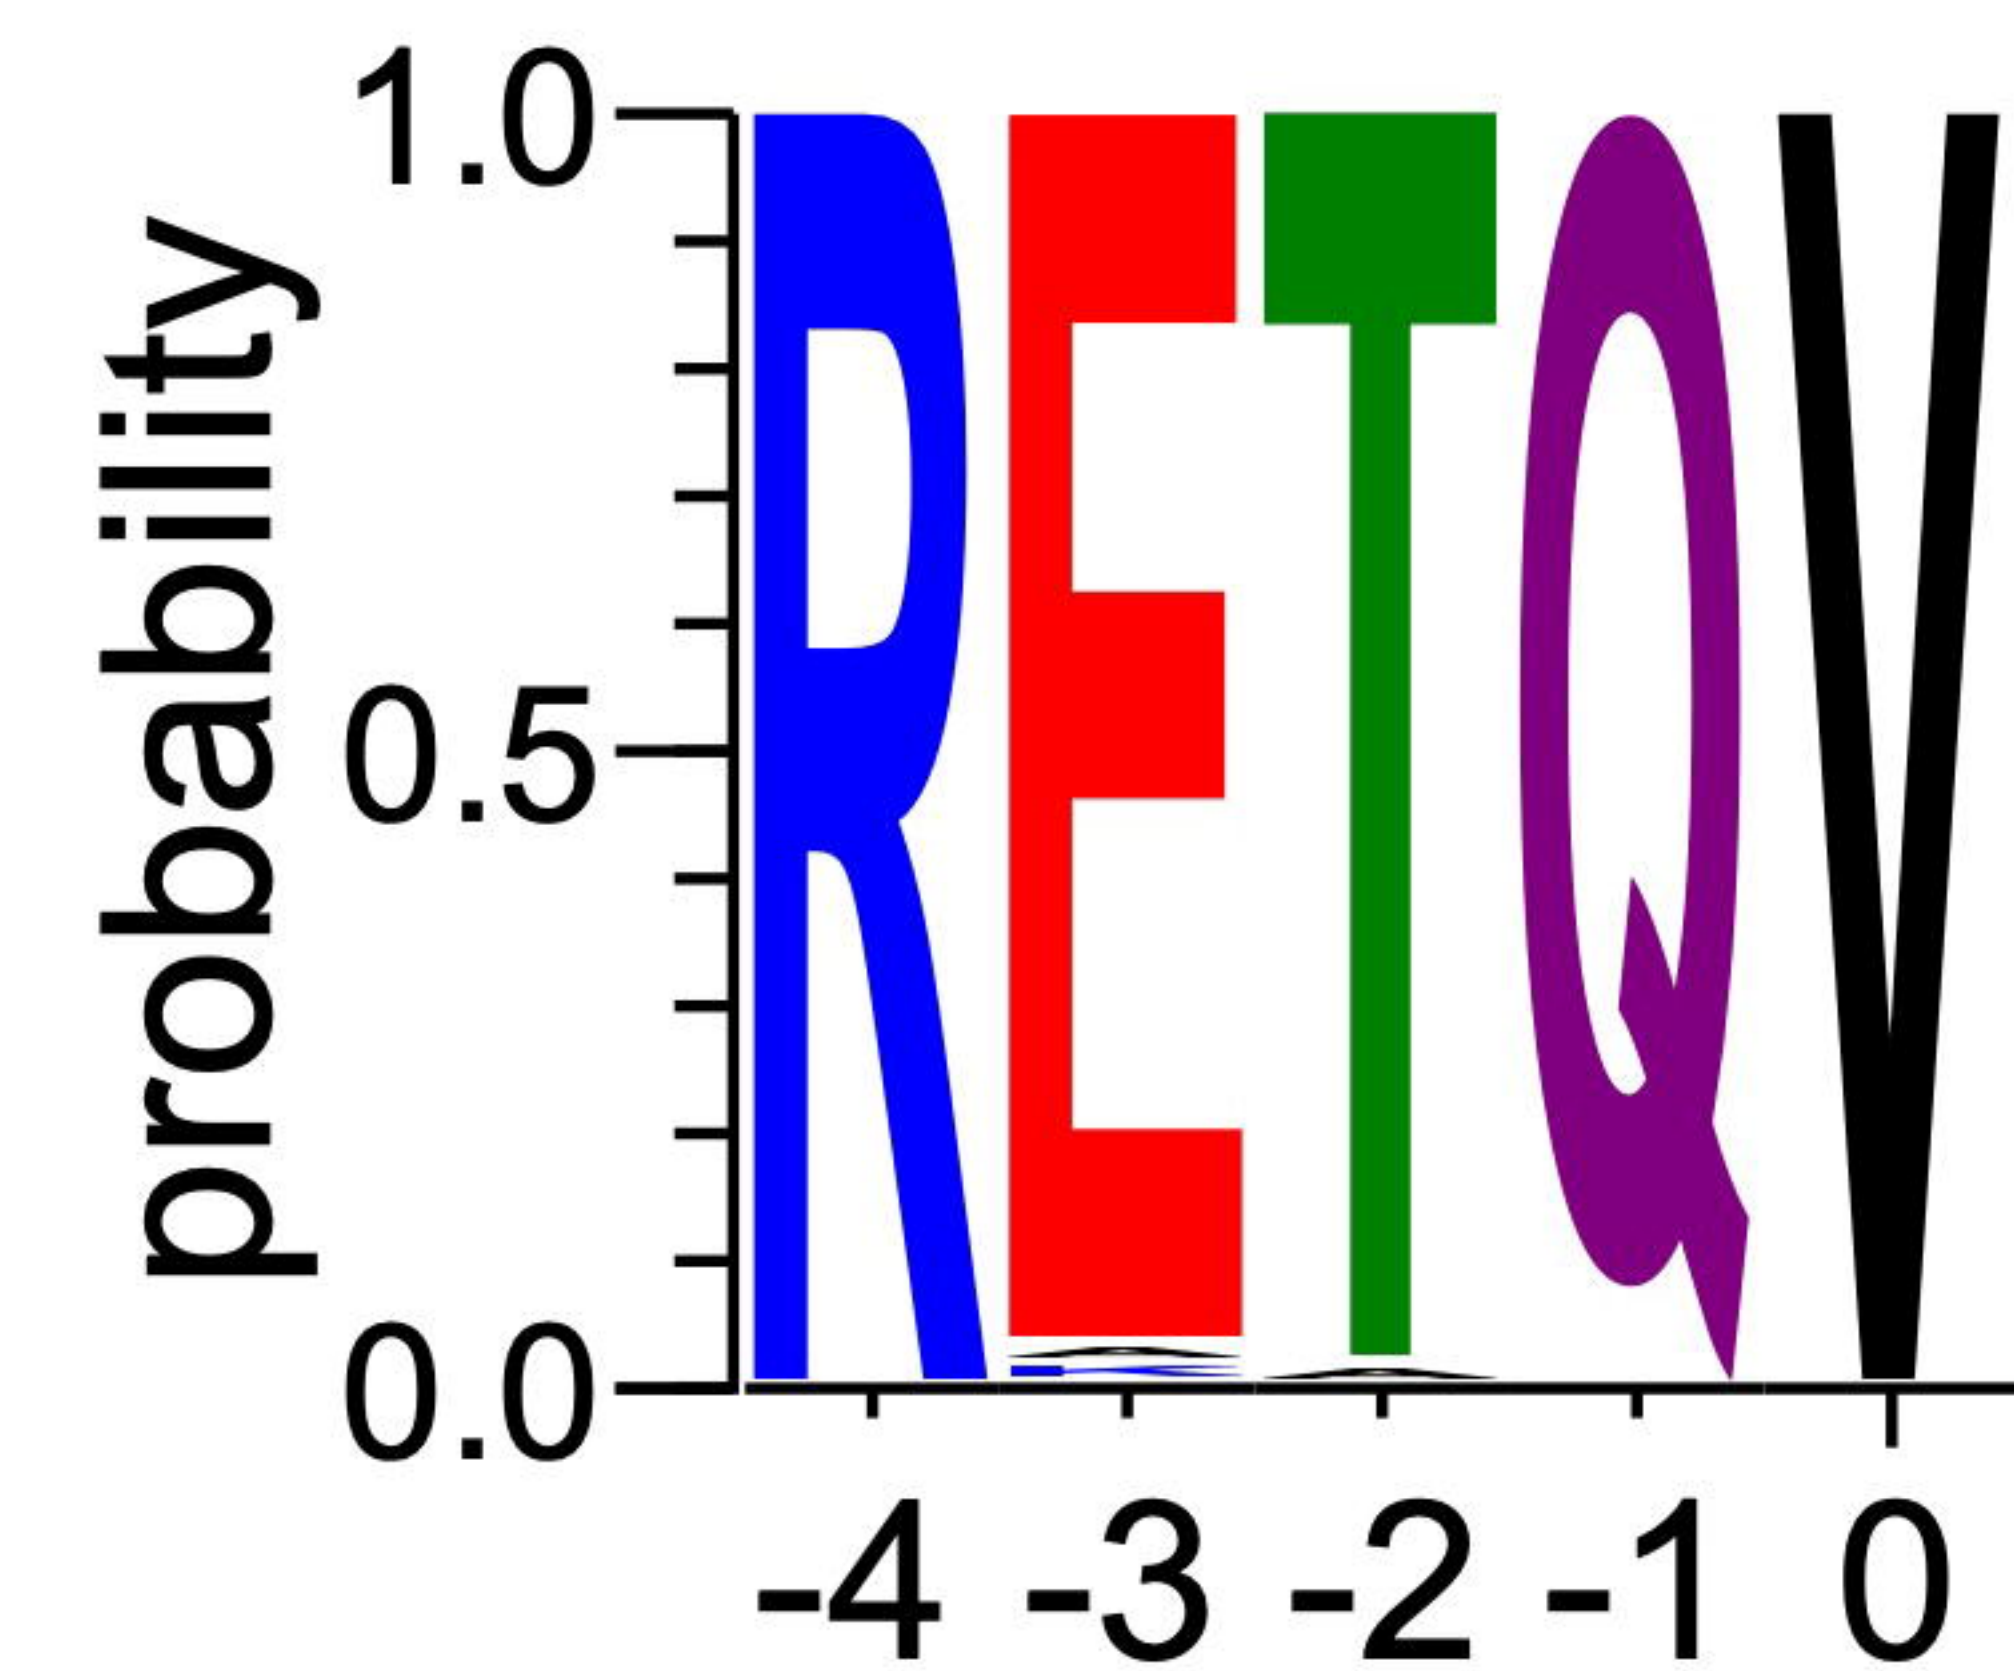

# HBV core PBM

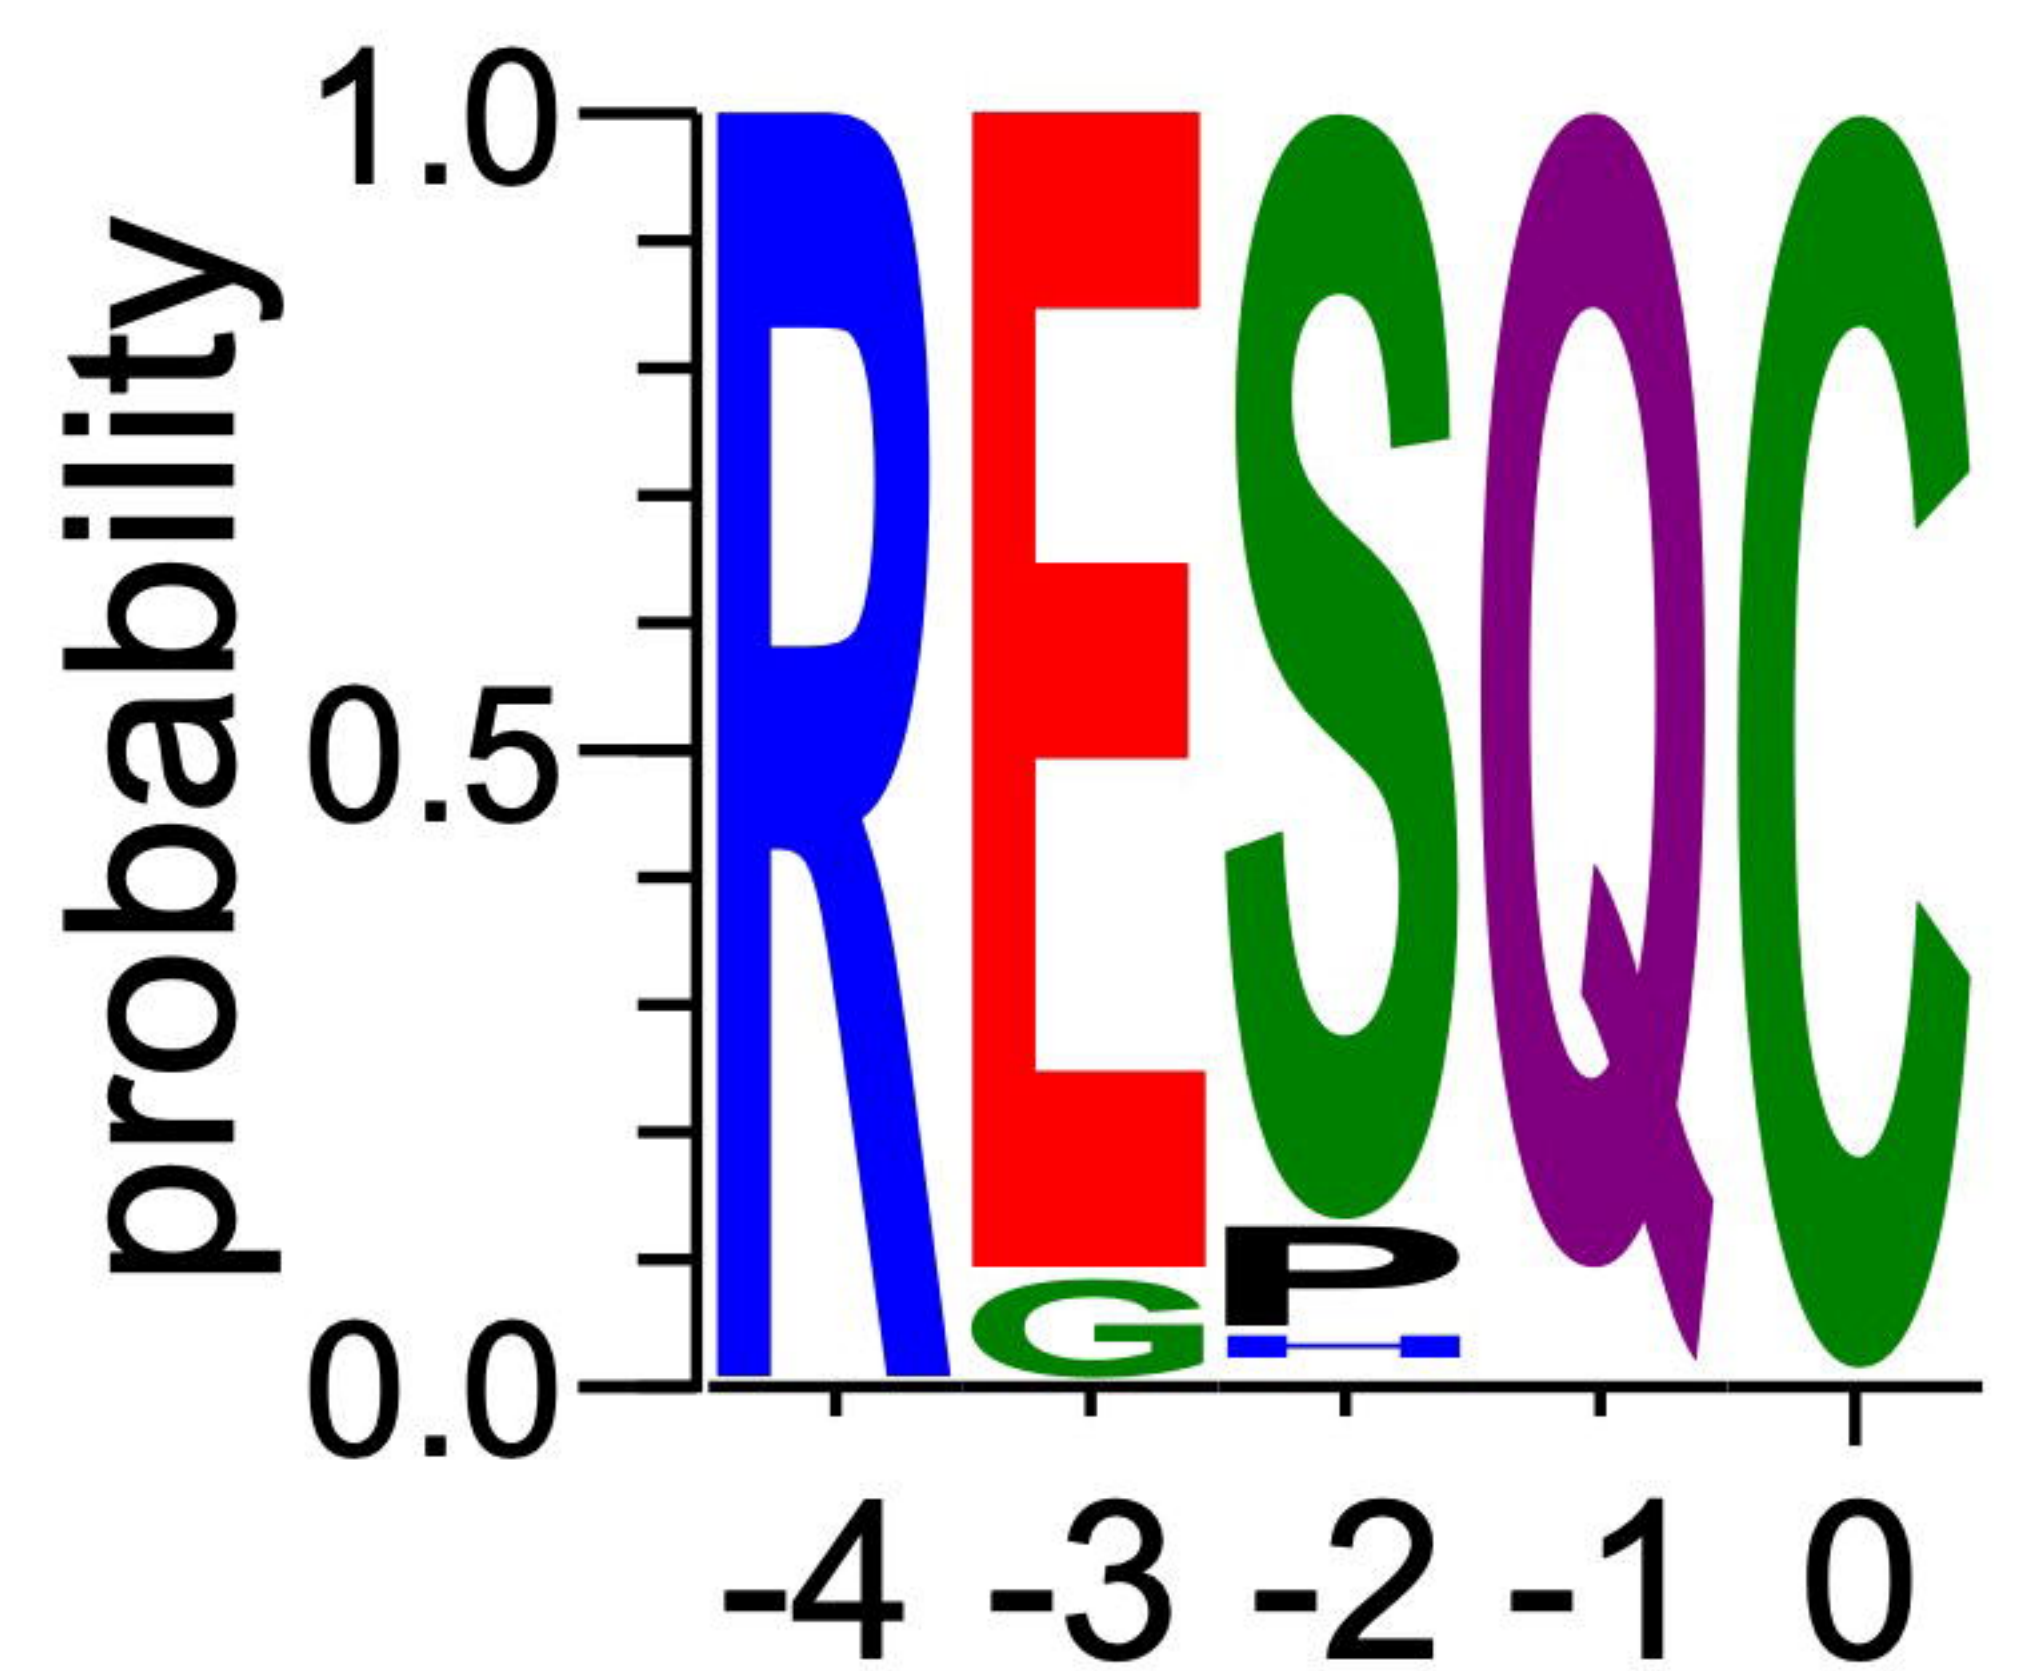

# TACE PBM

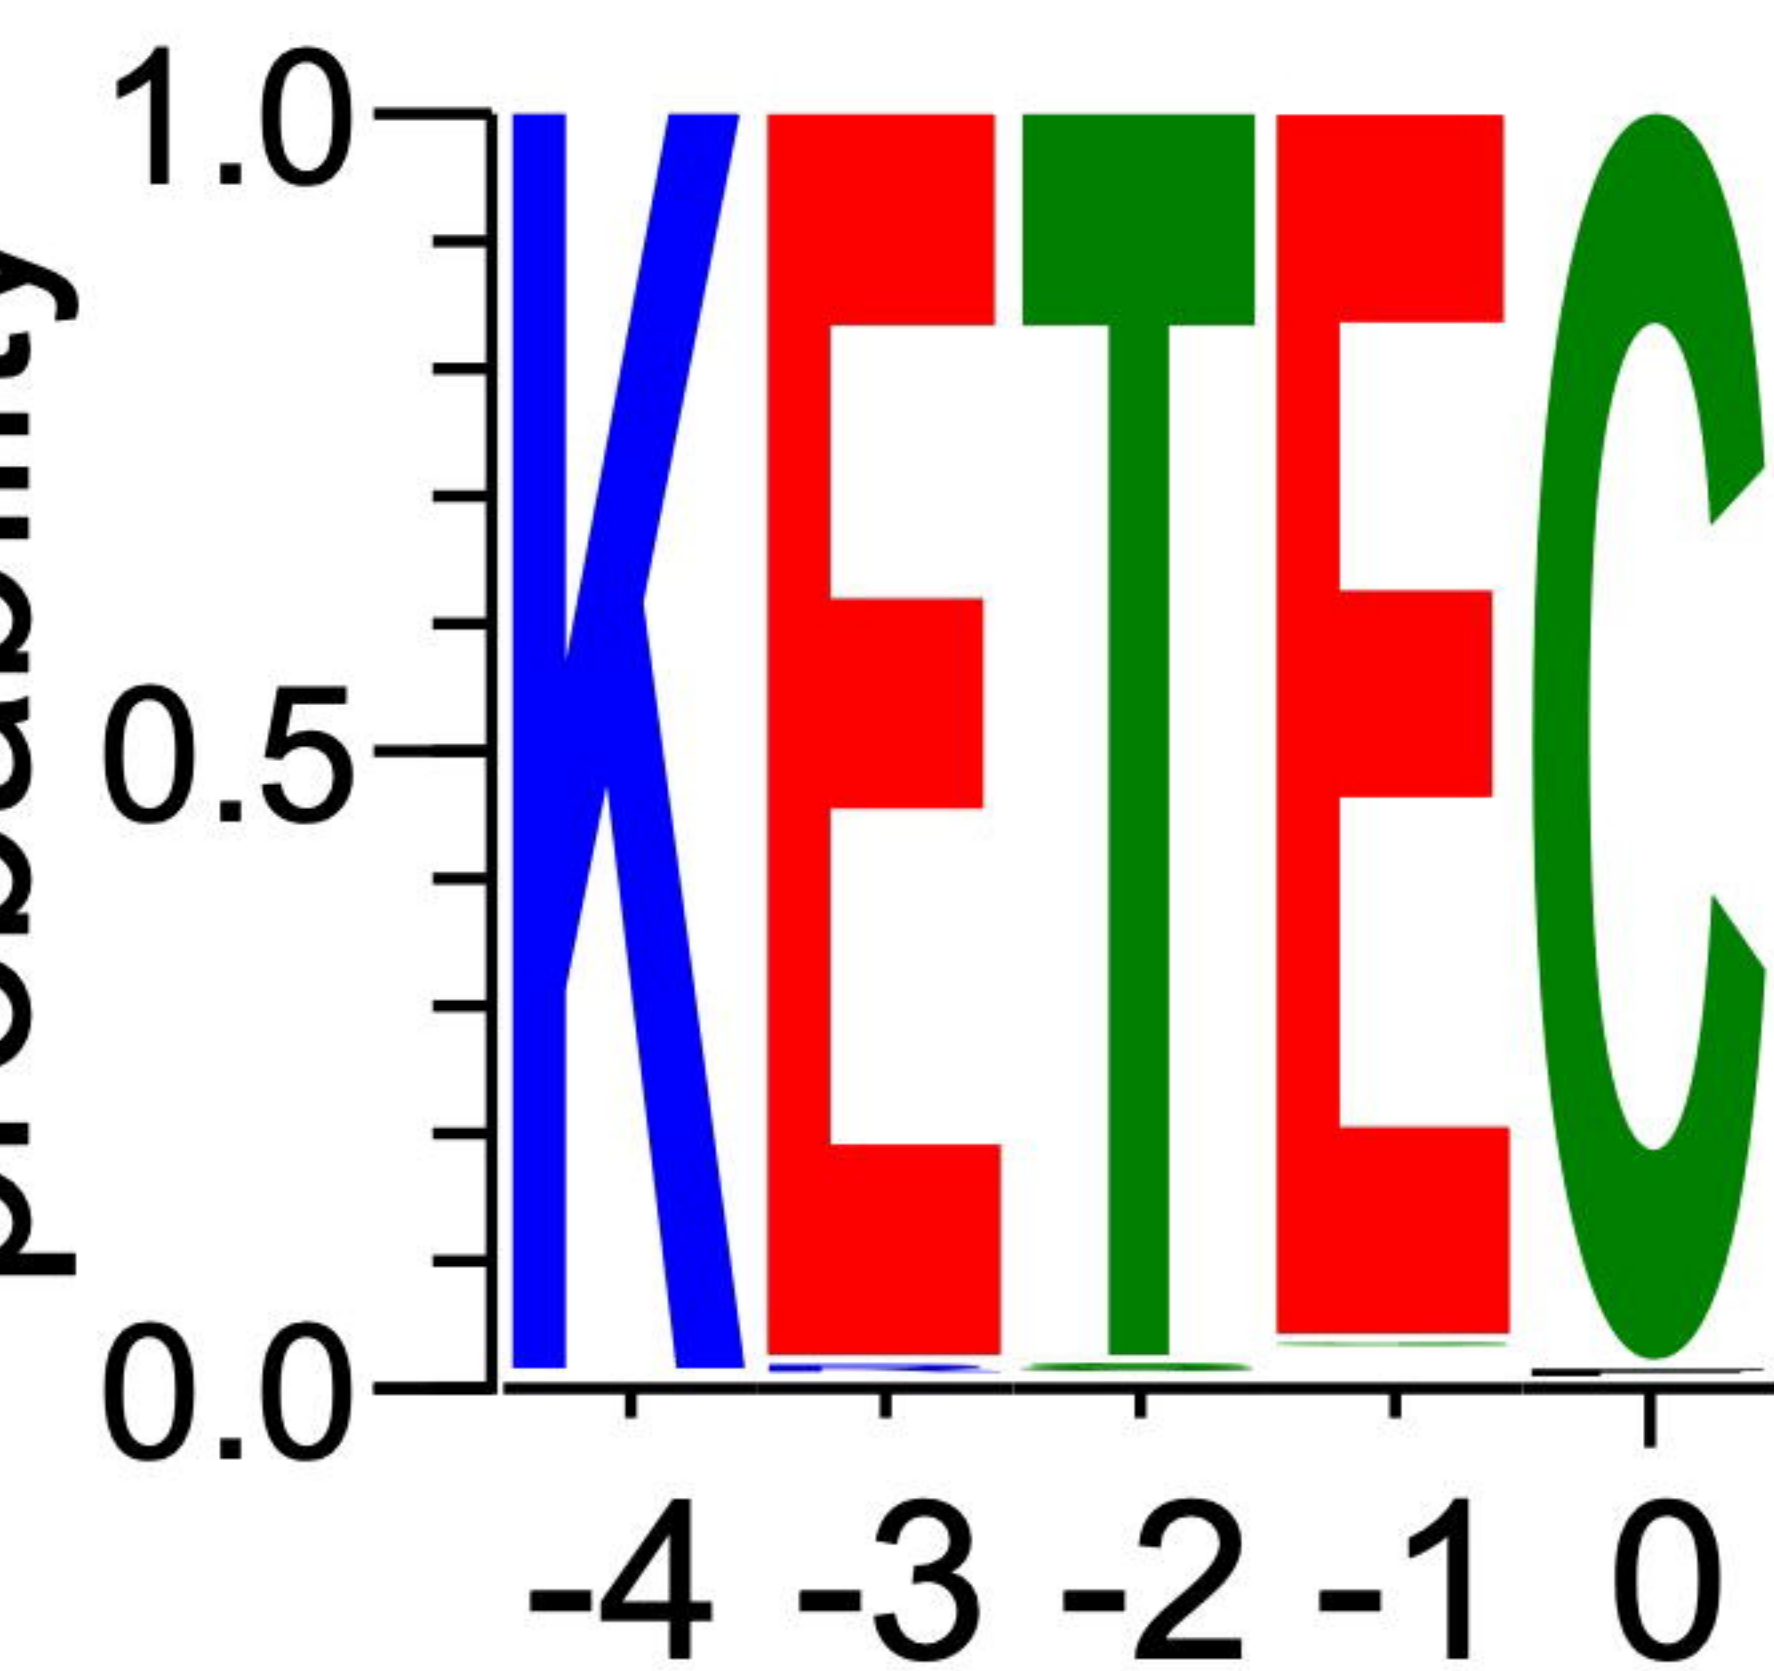

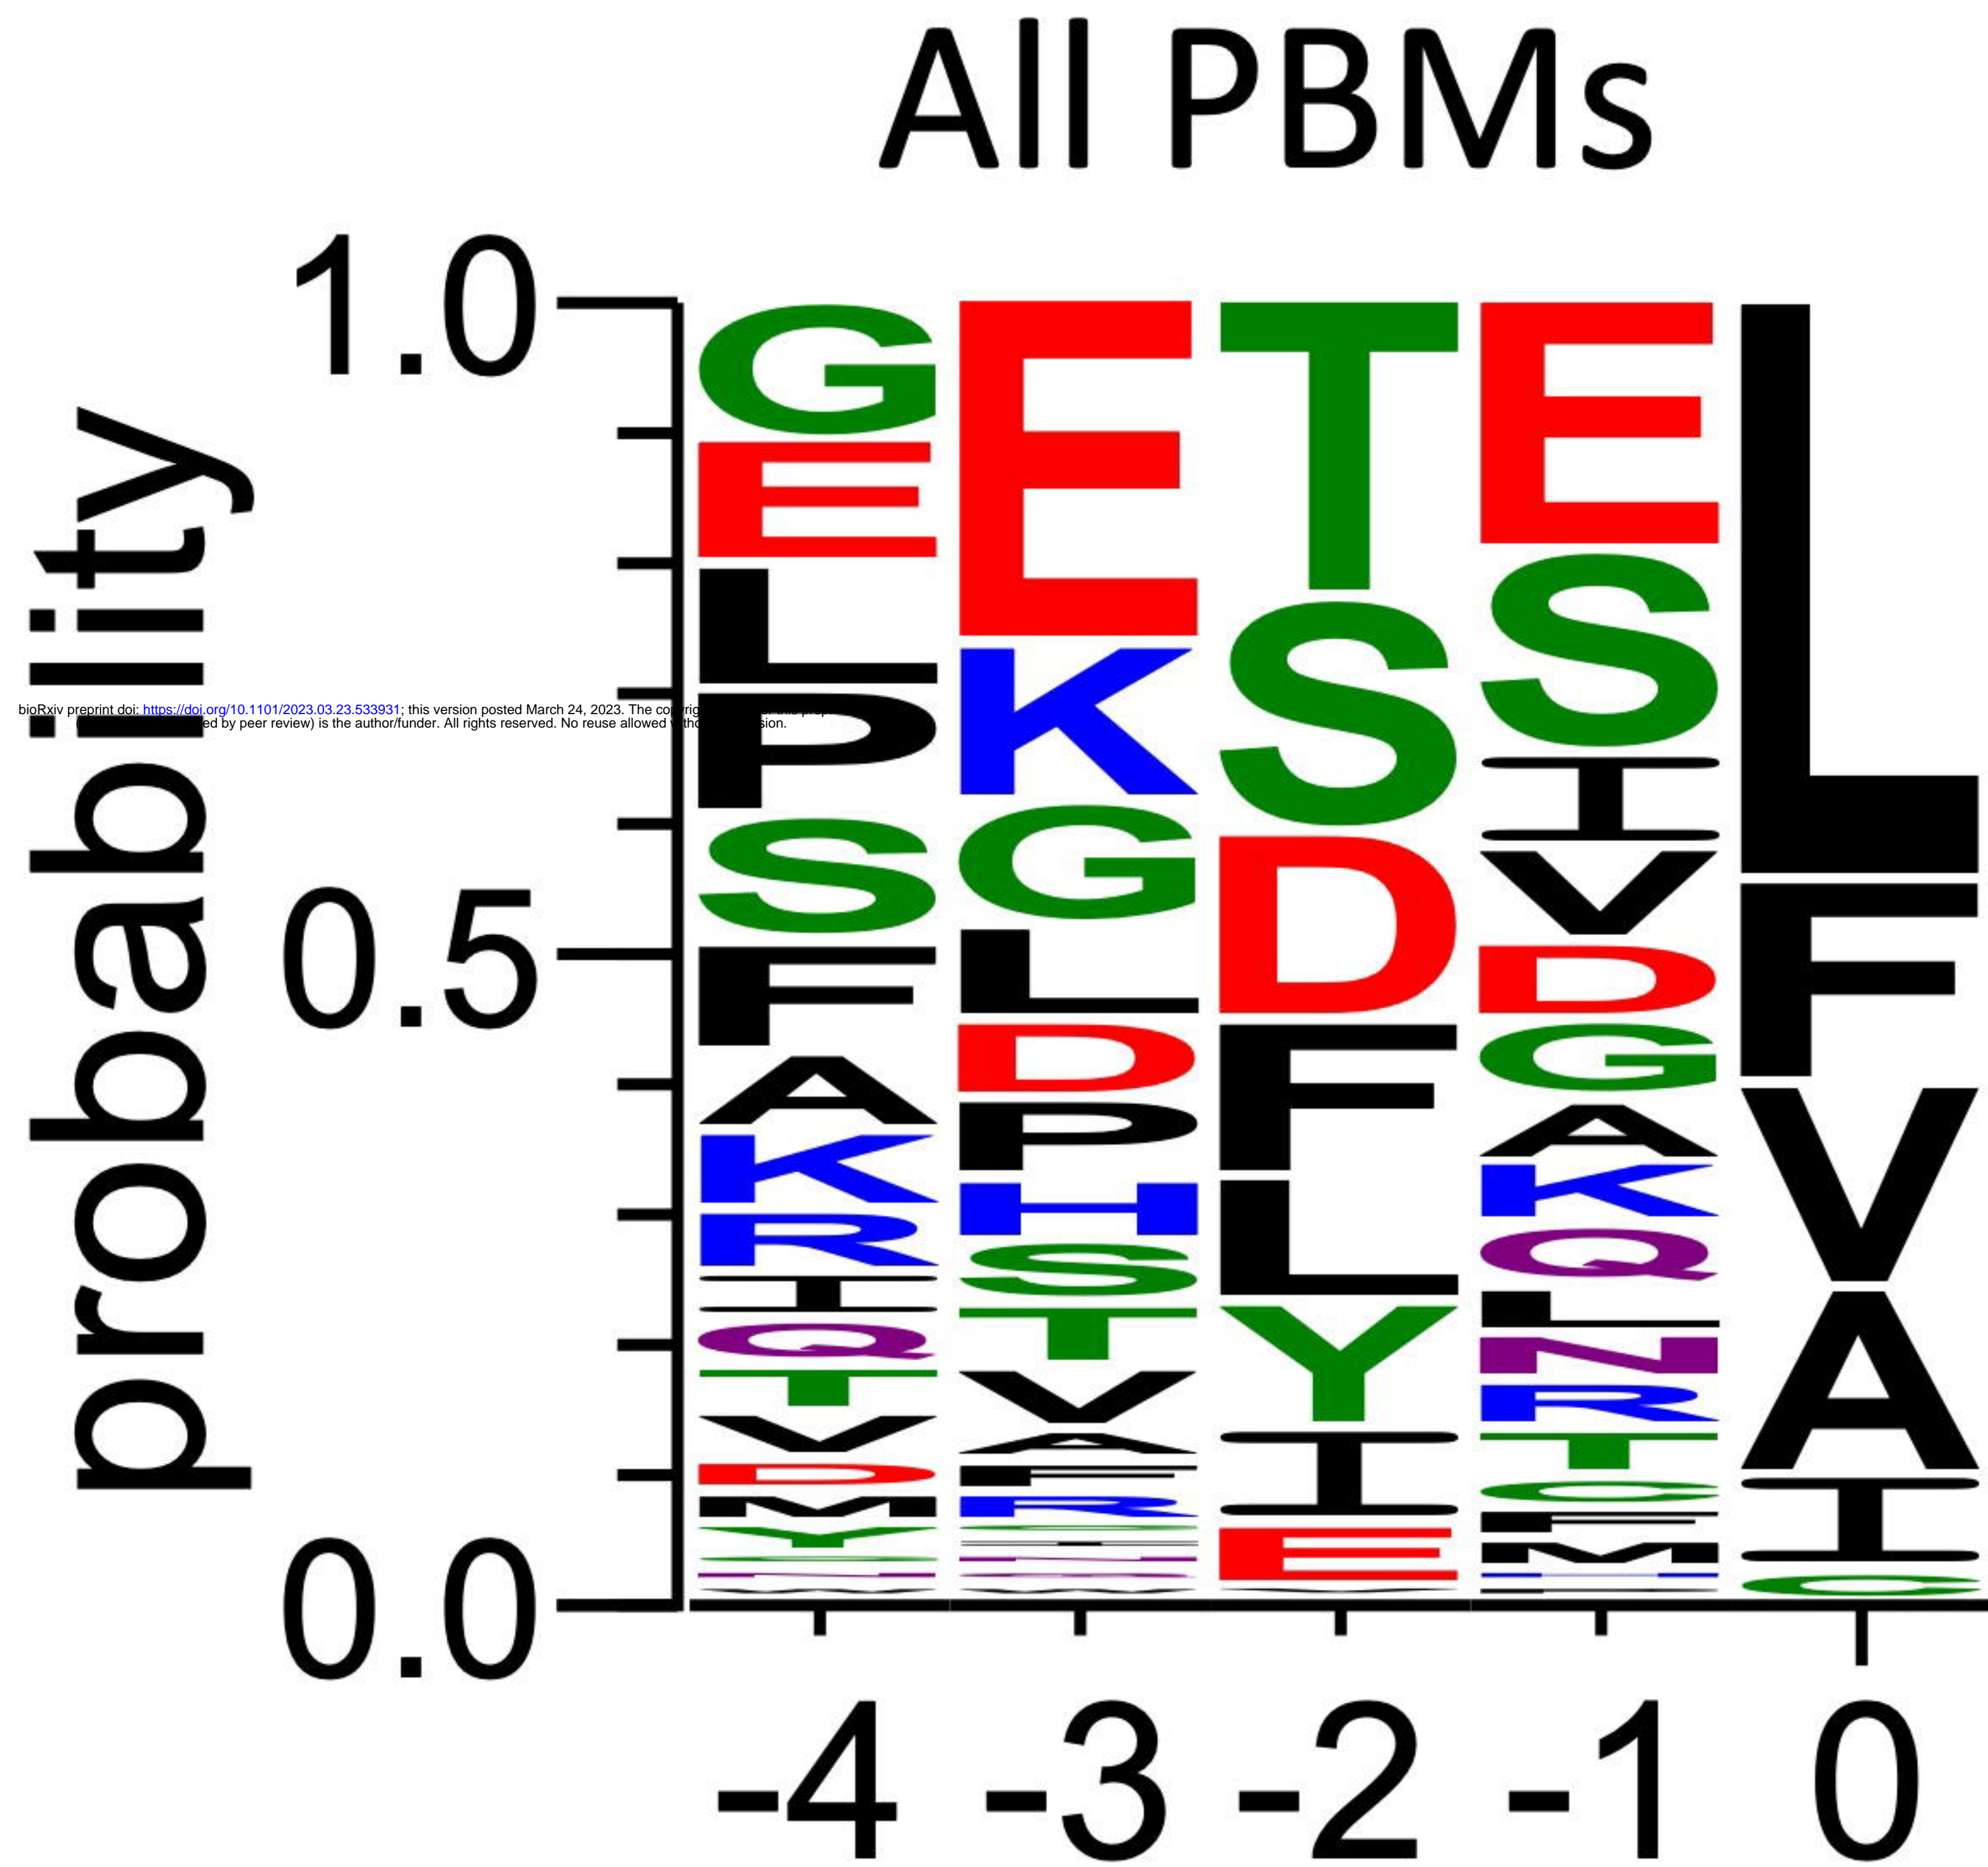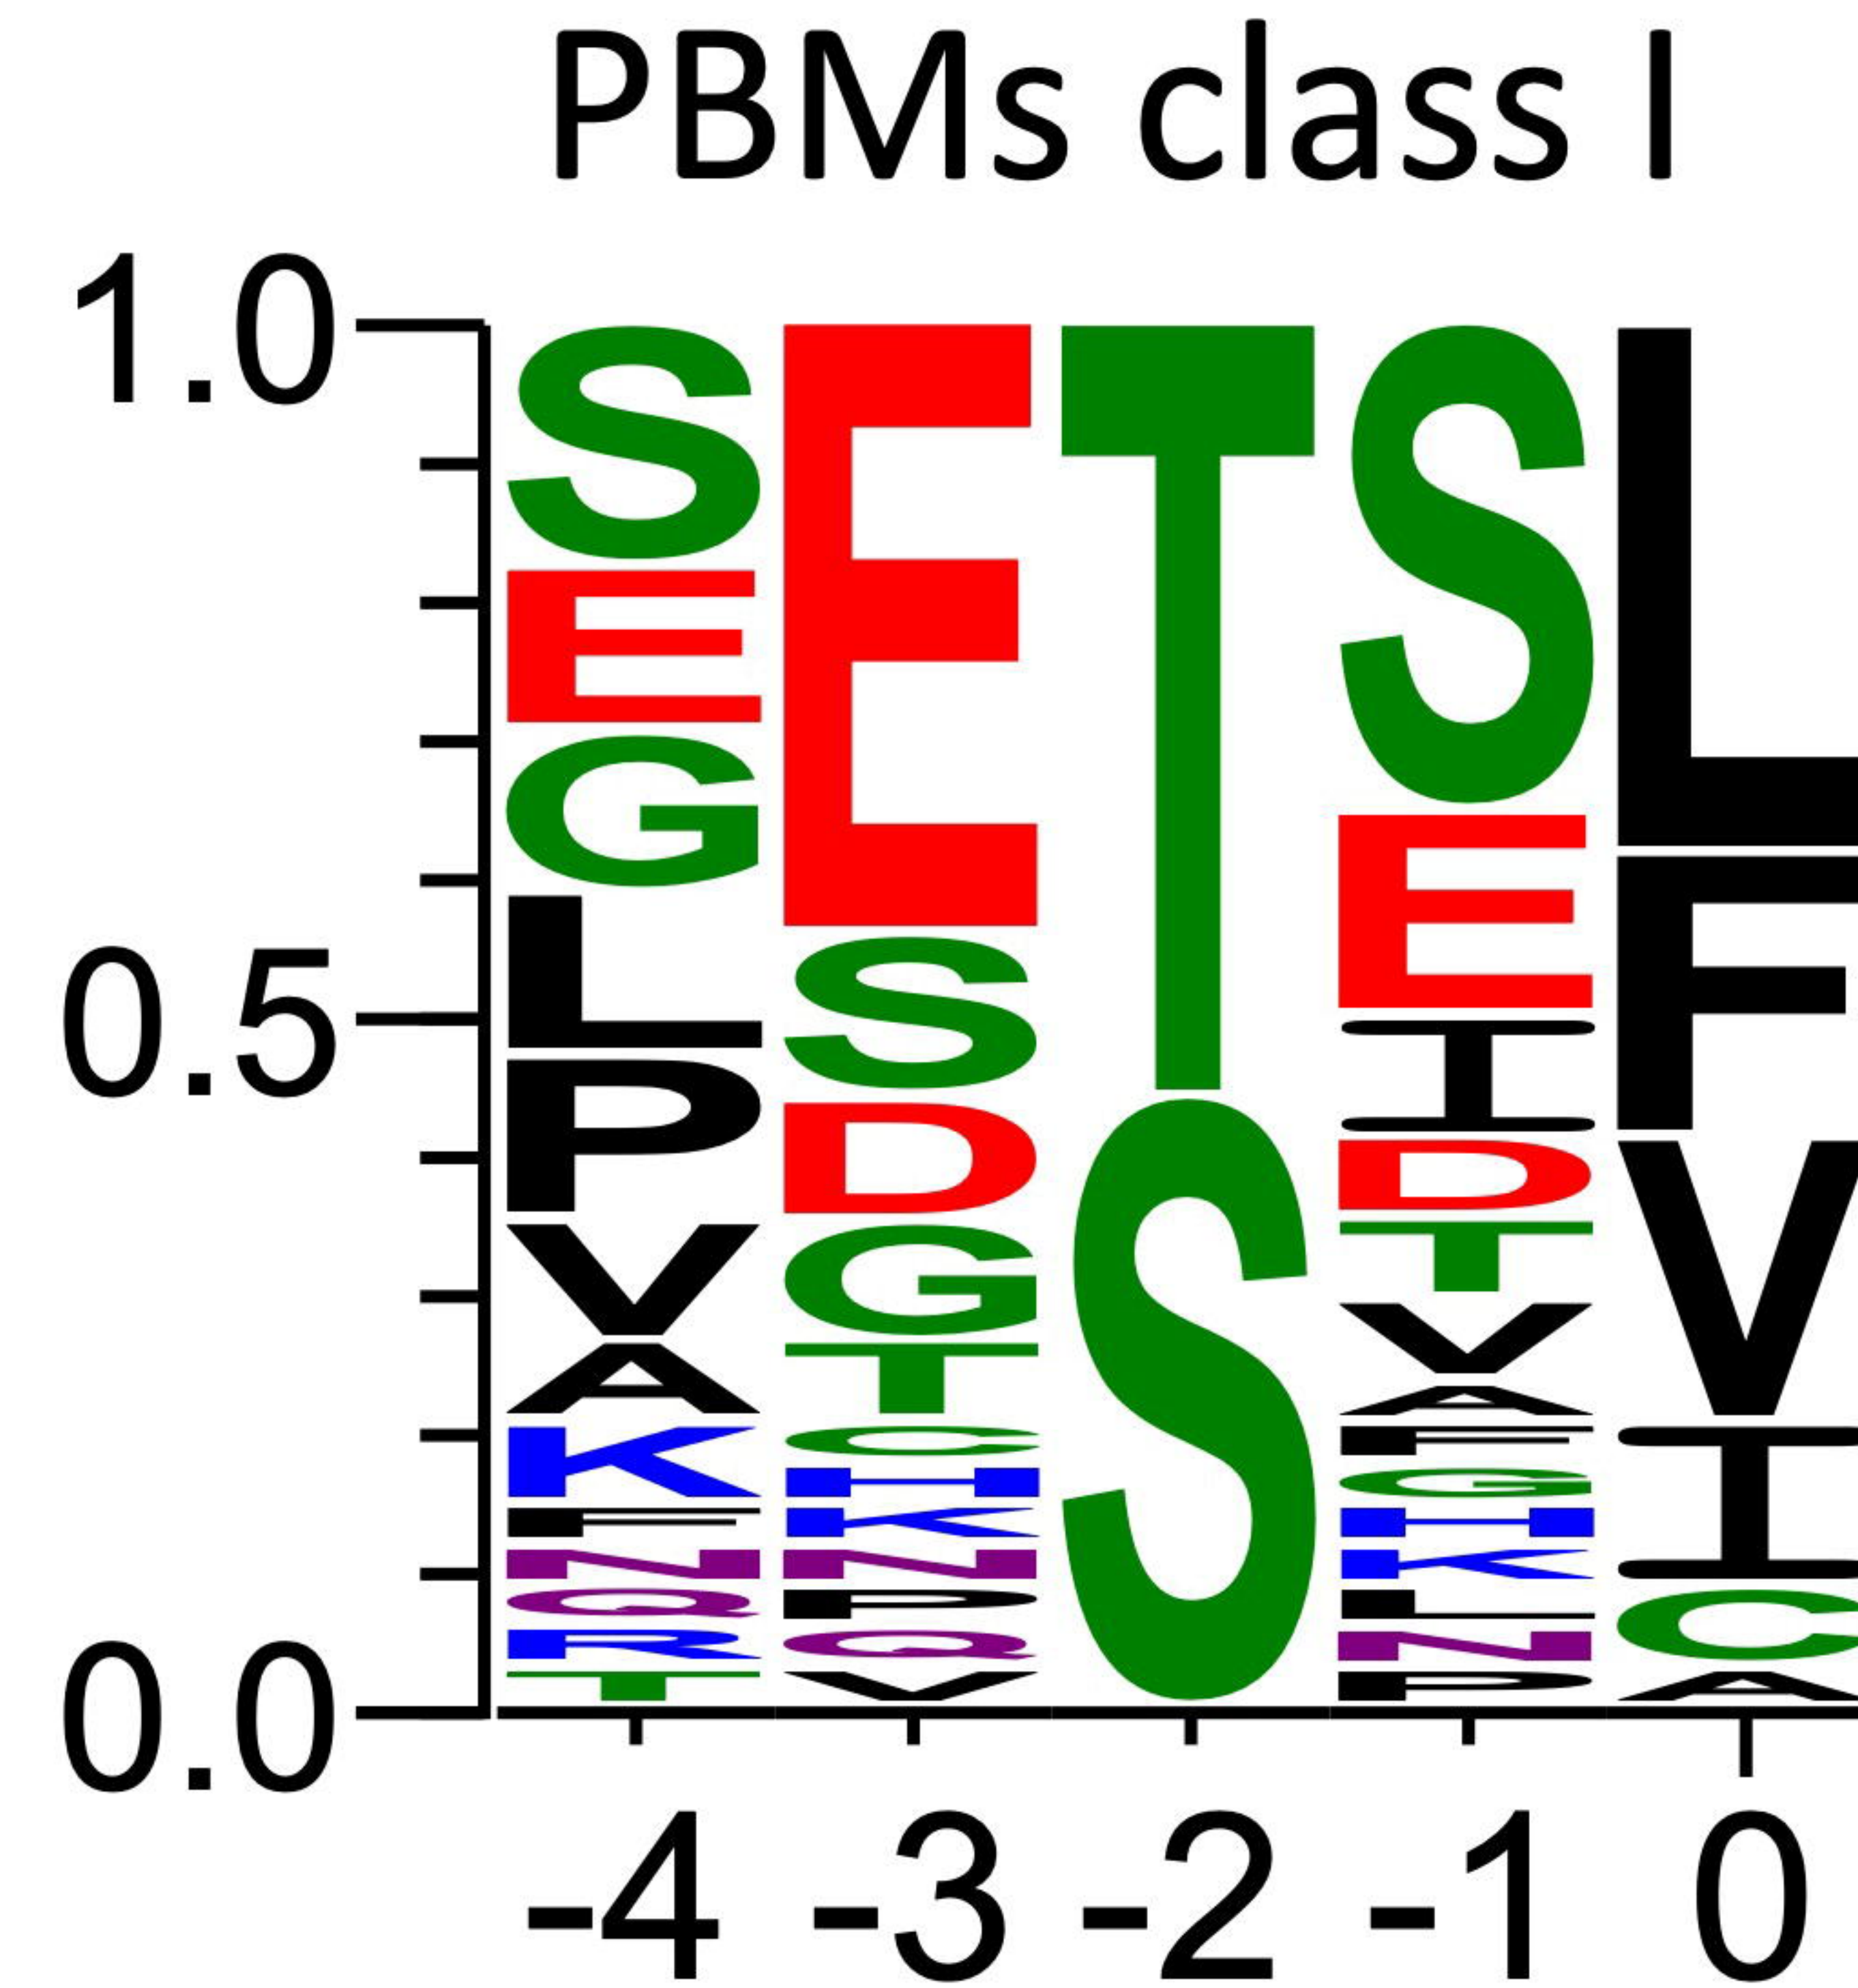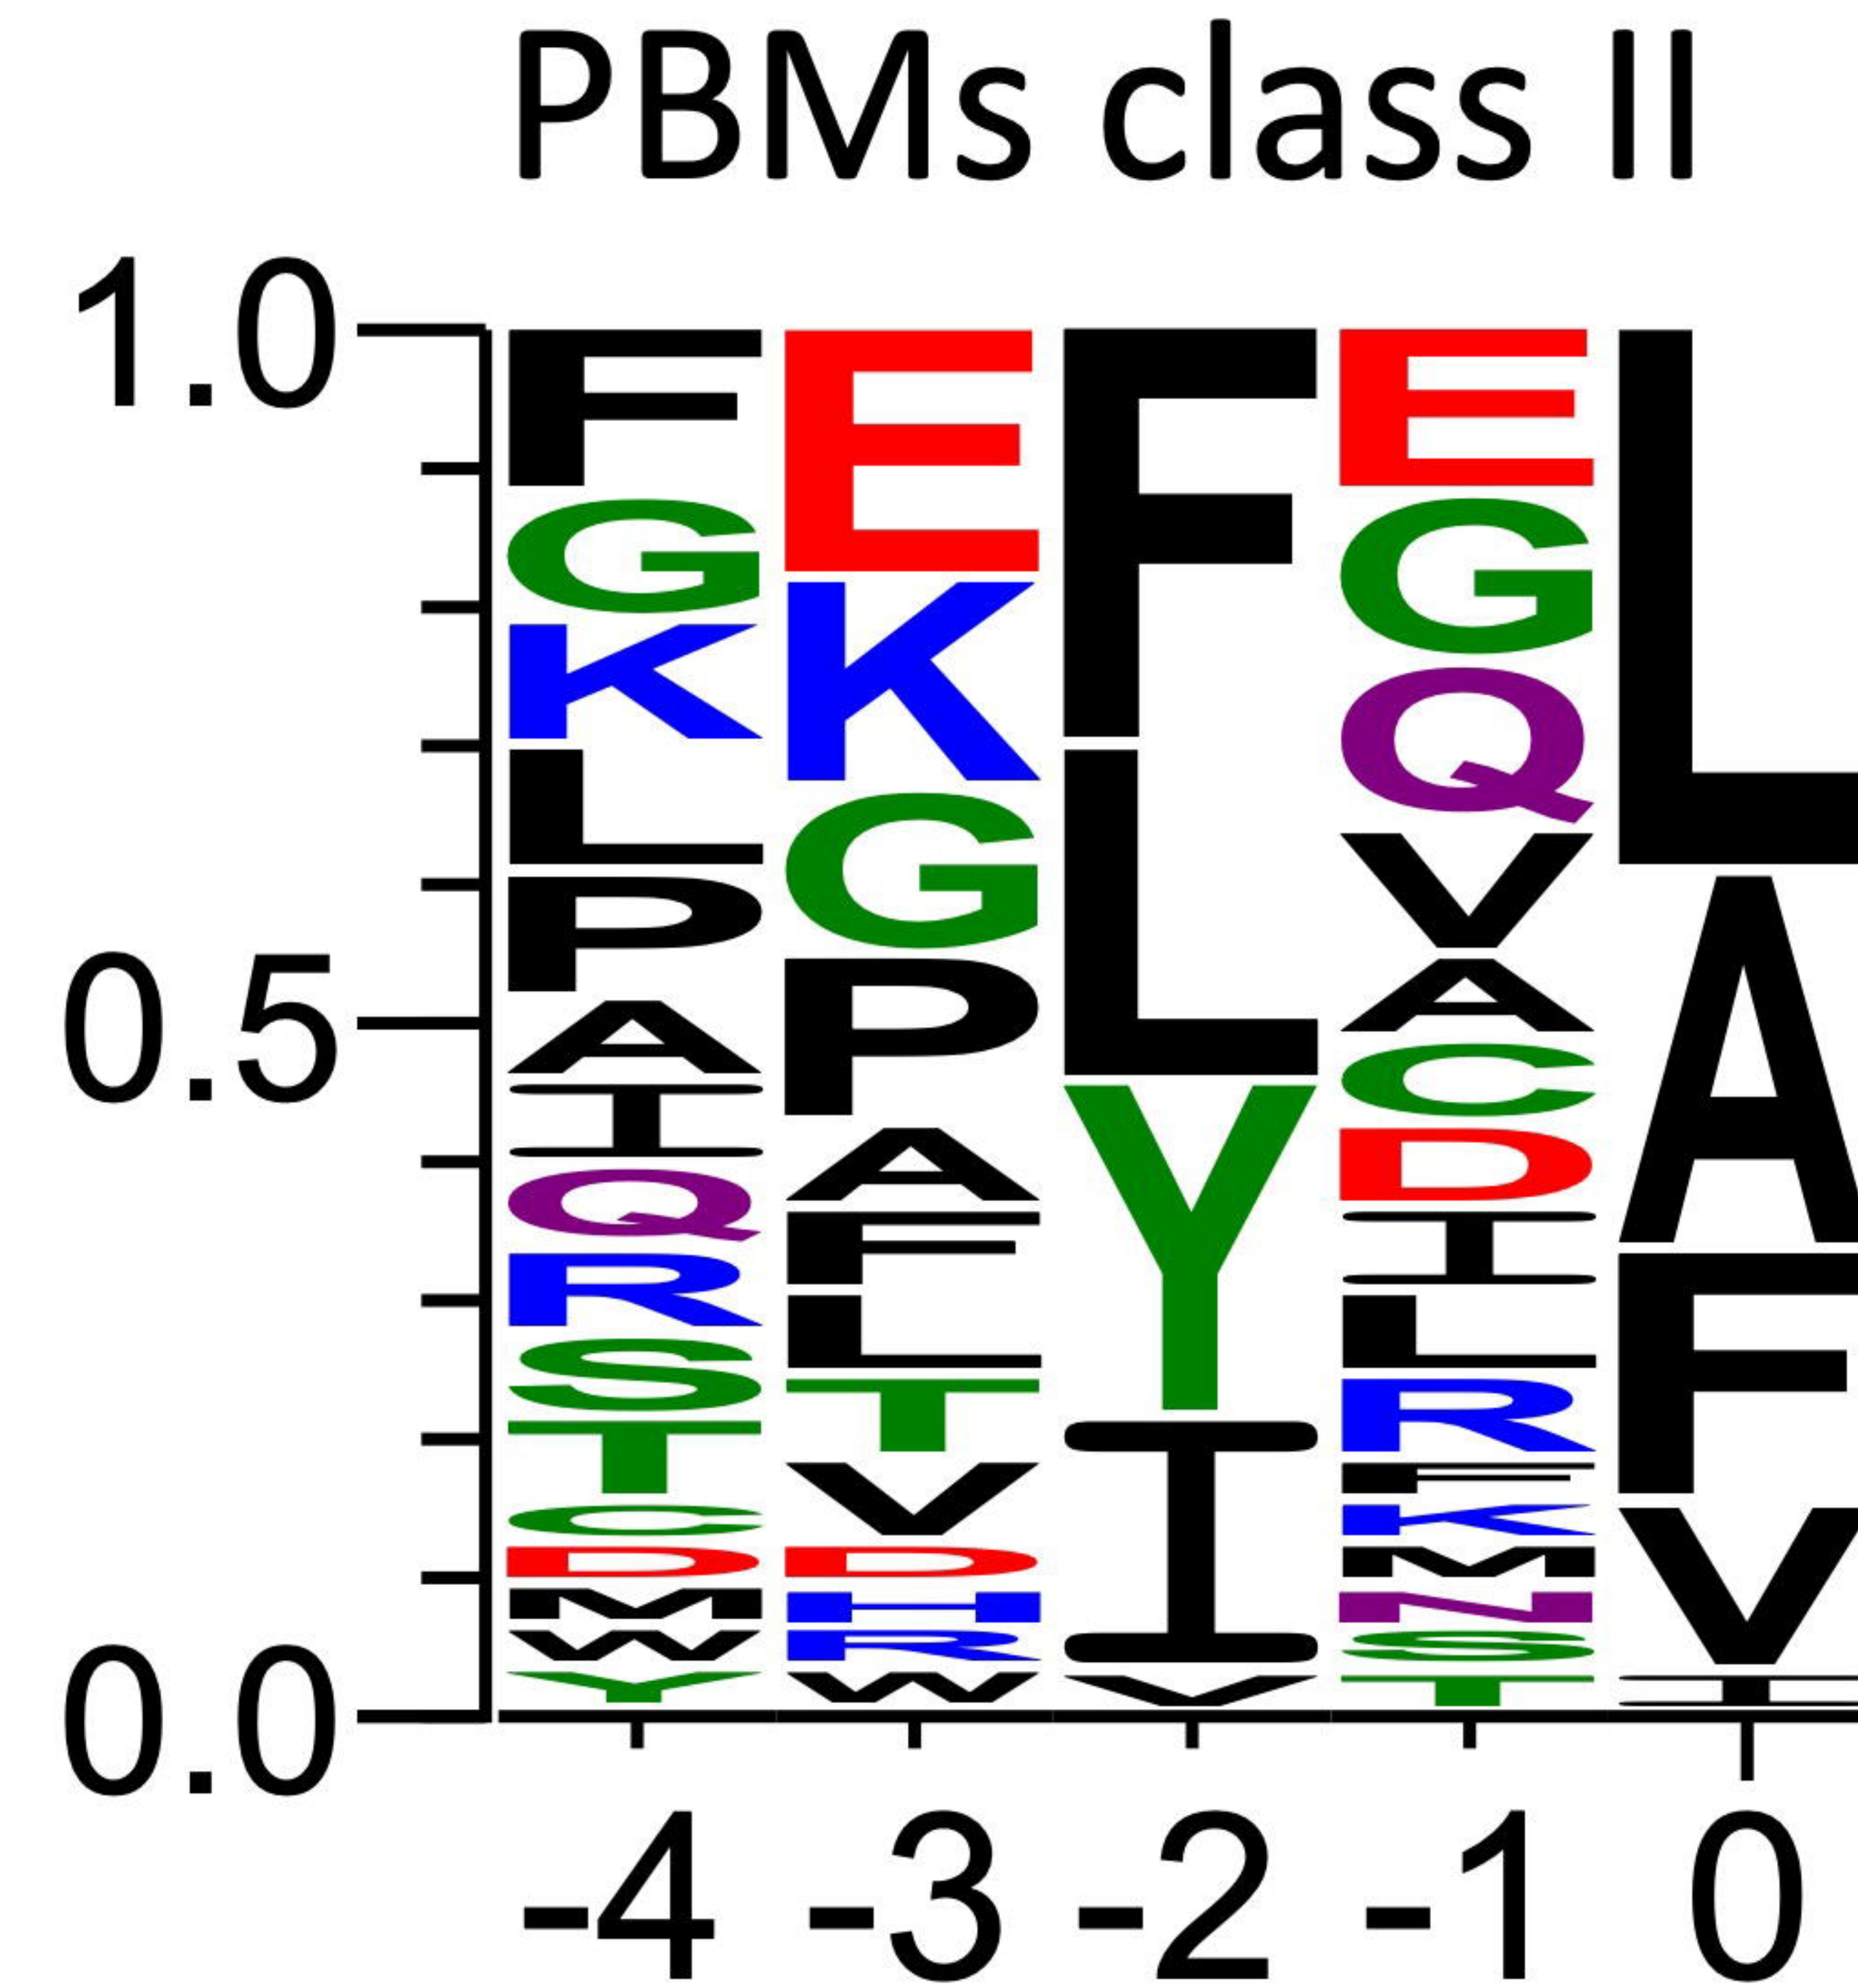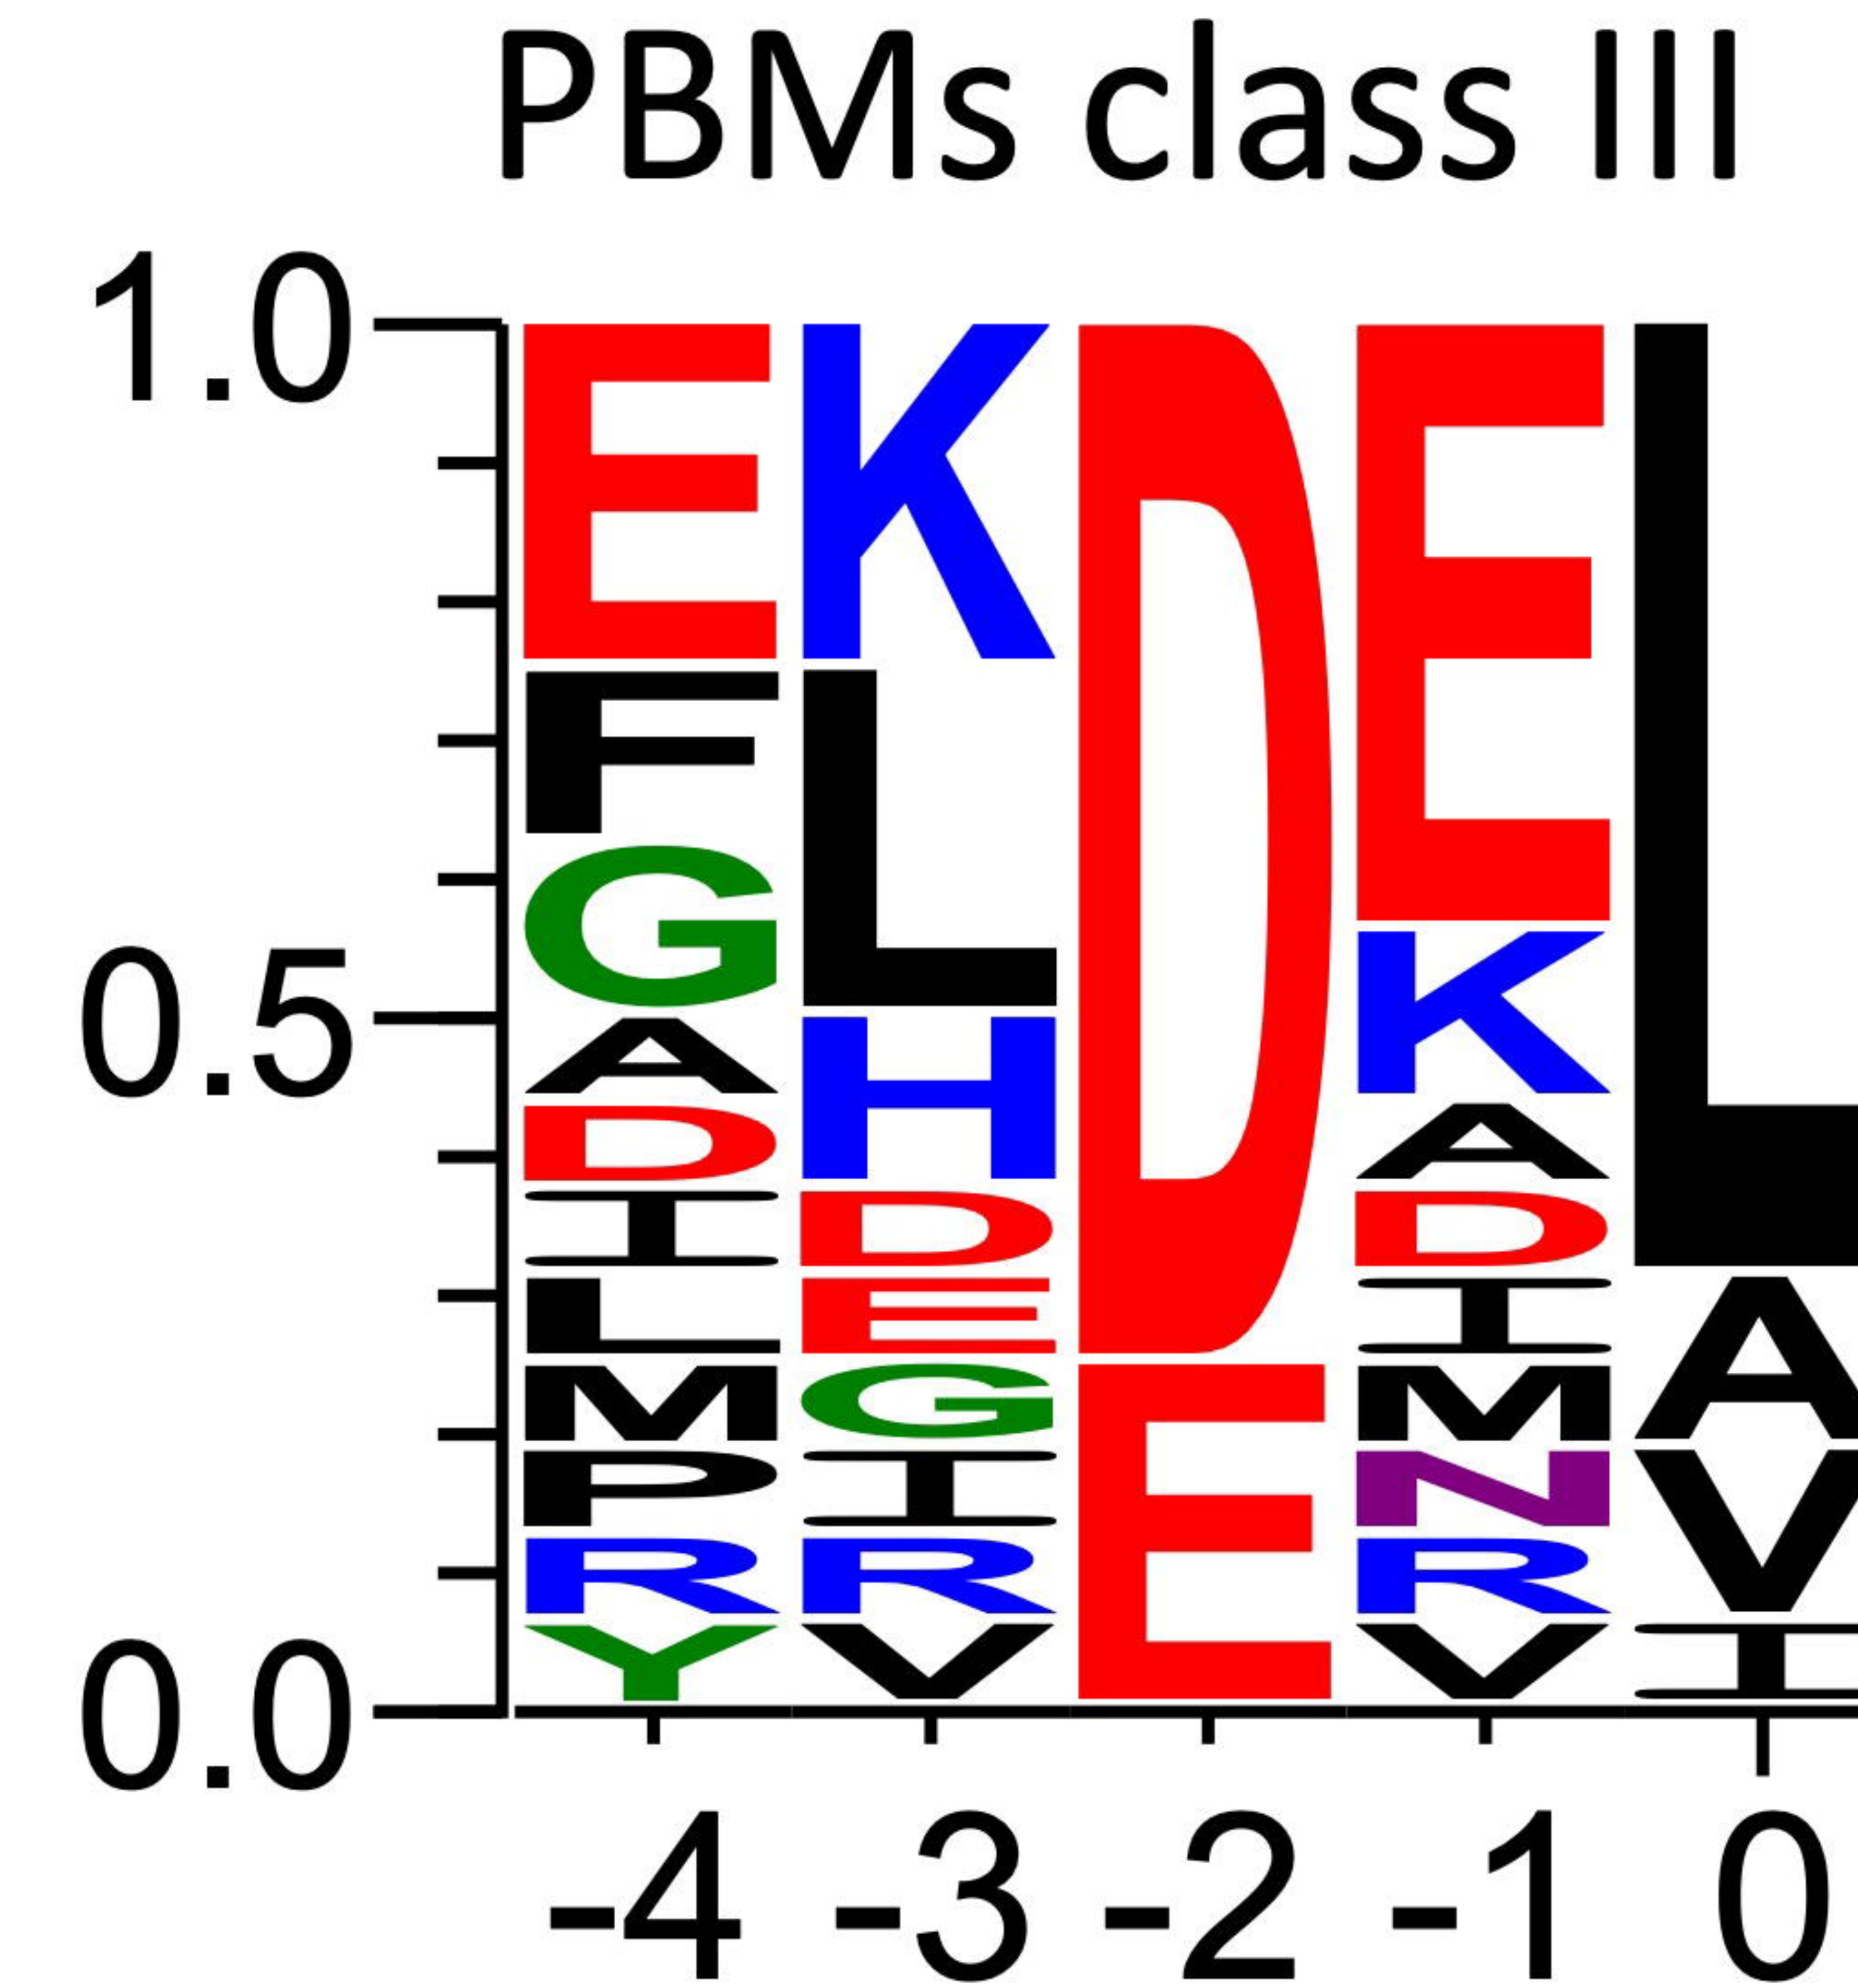



A

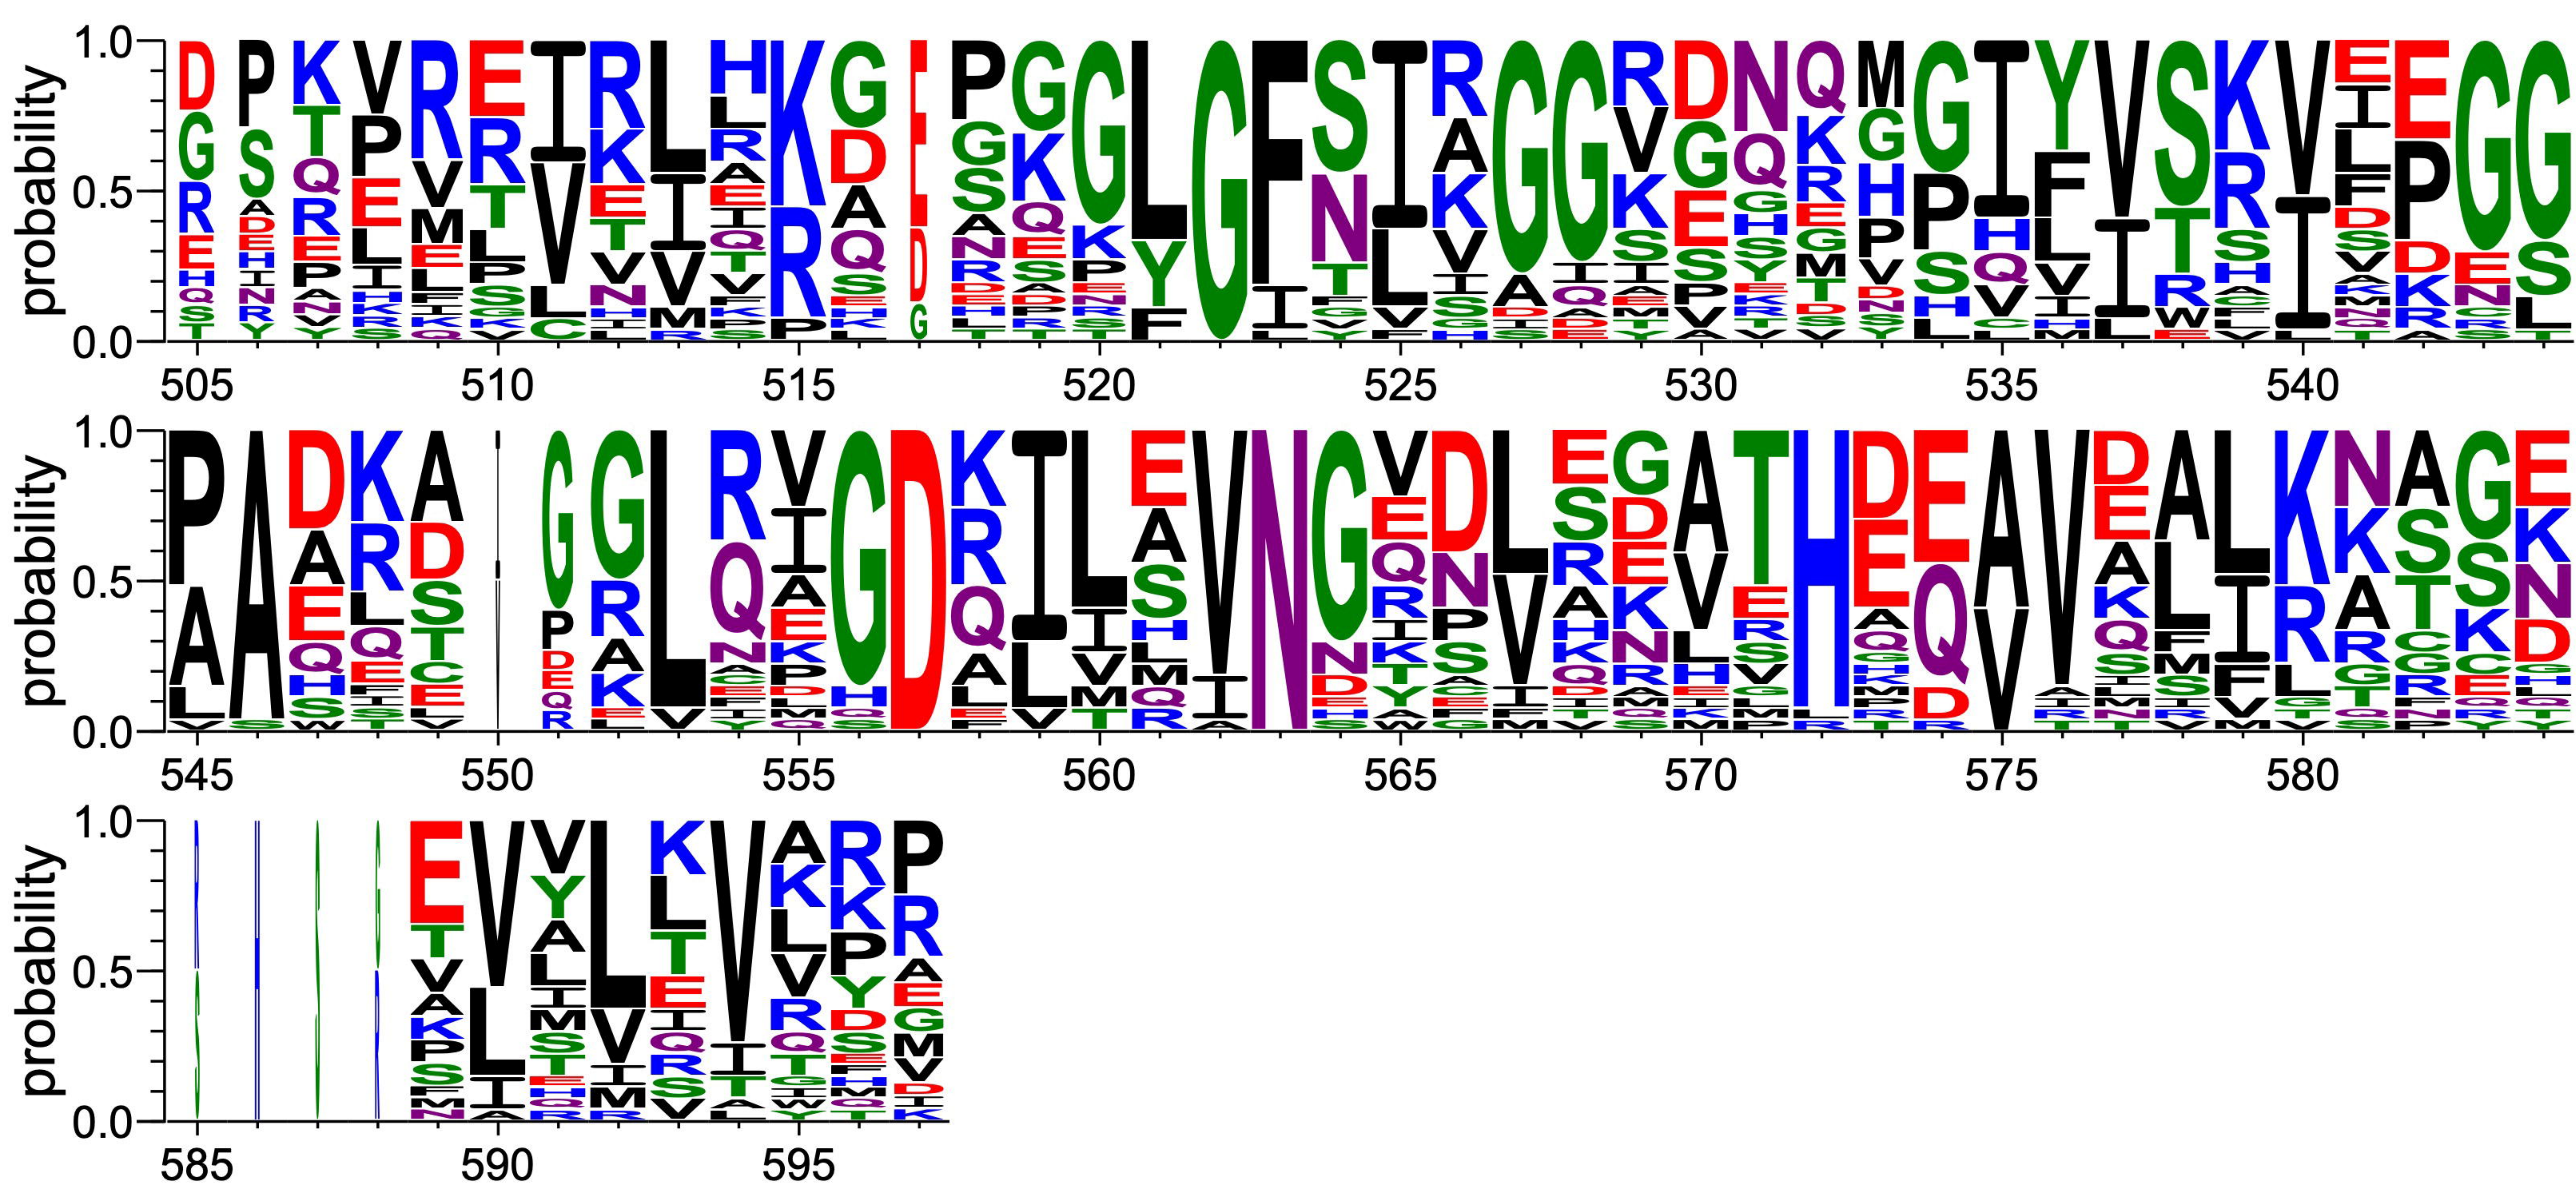

B

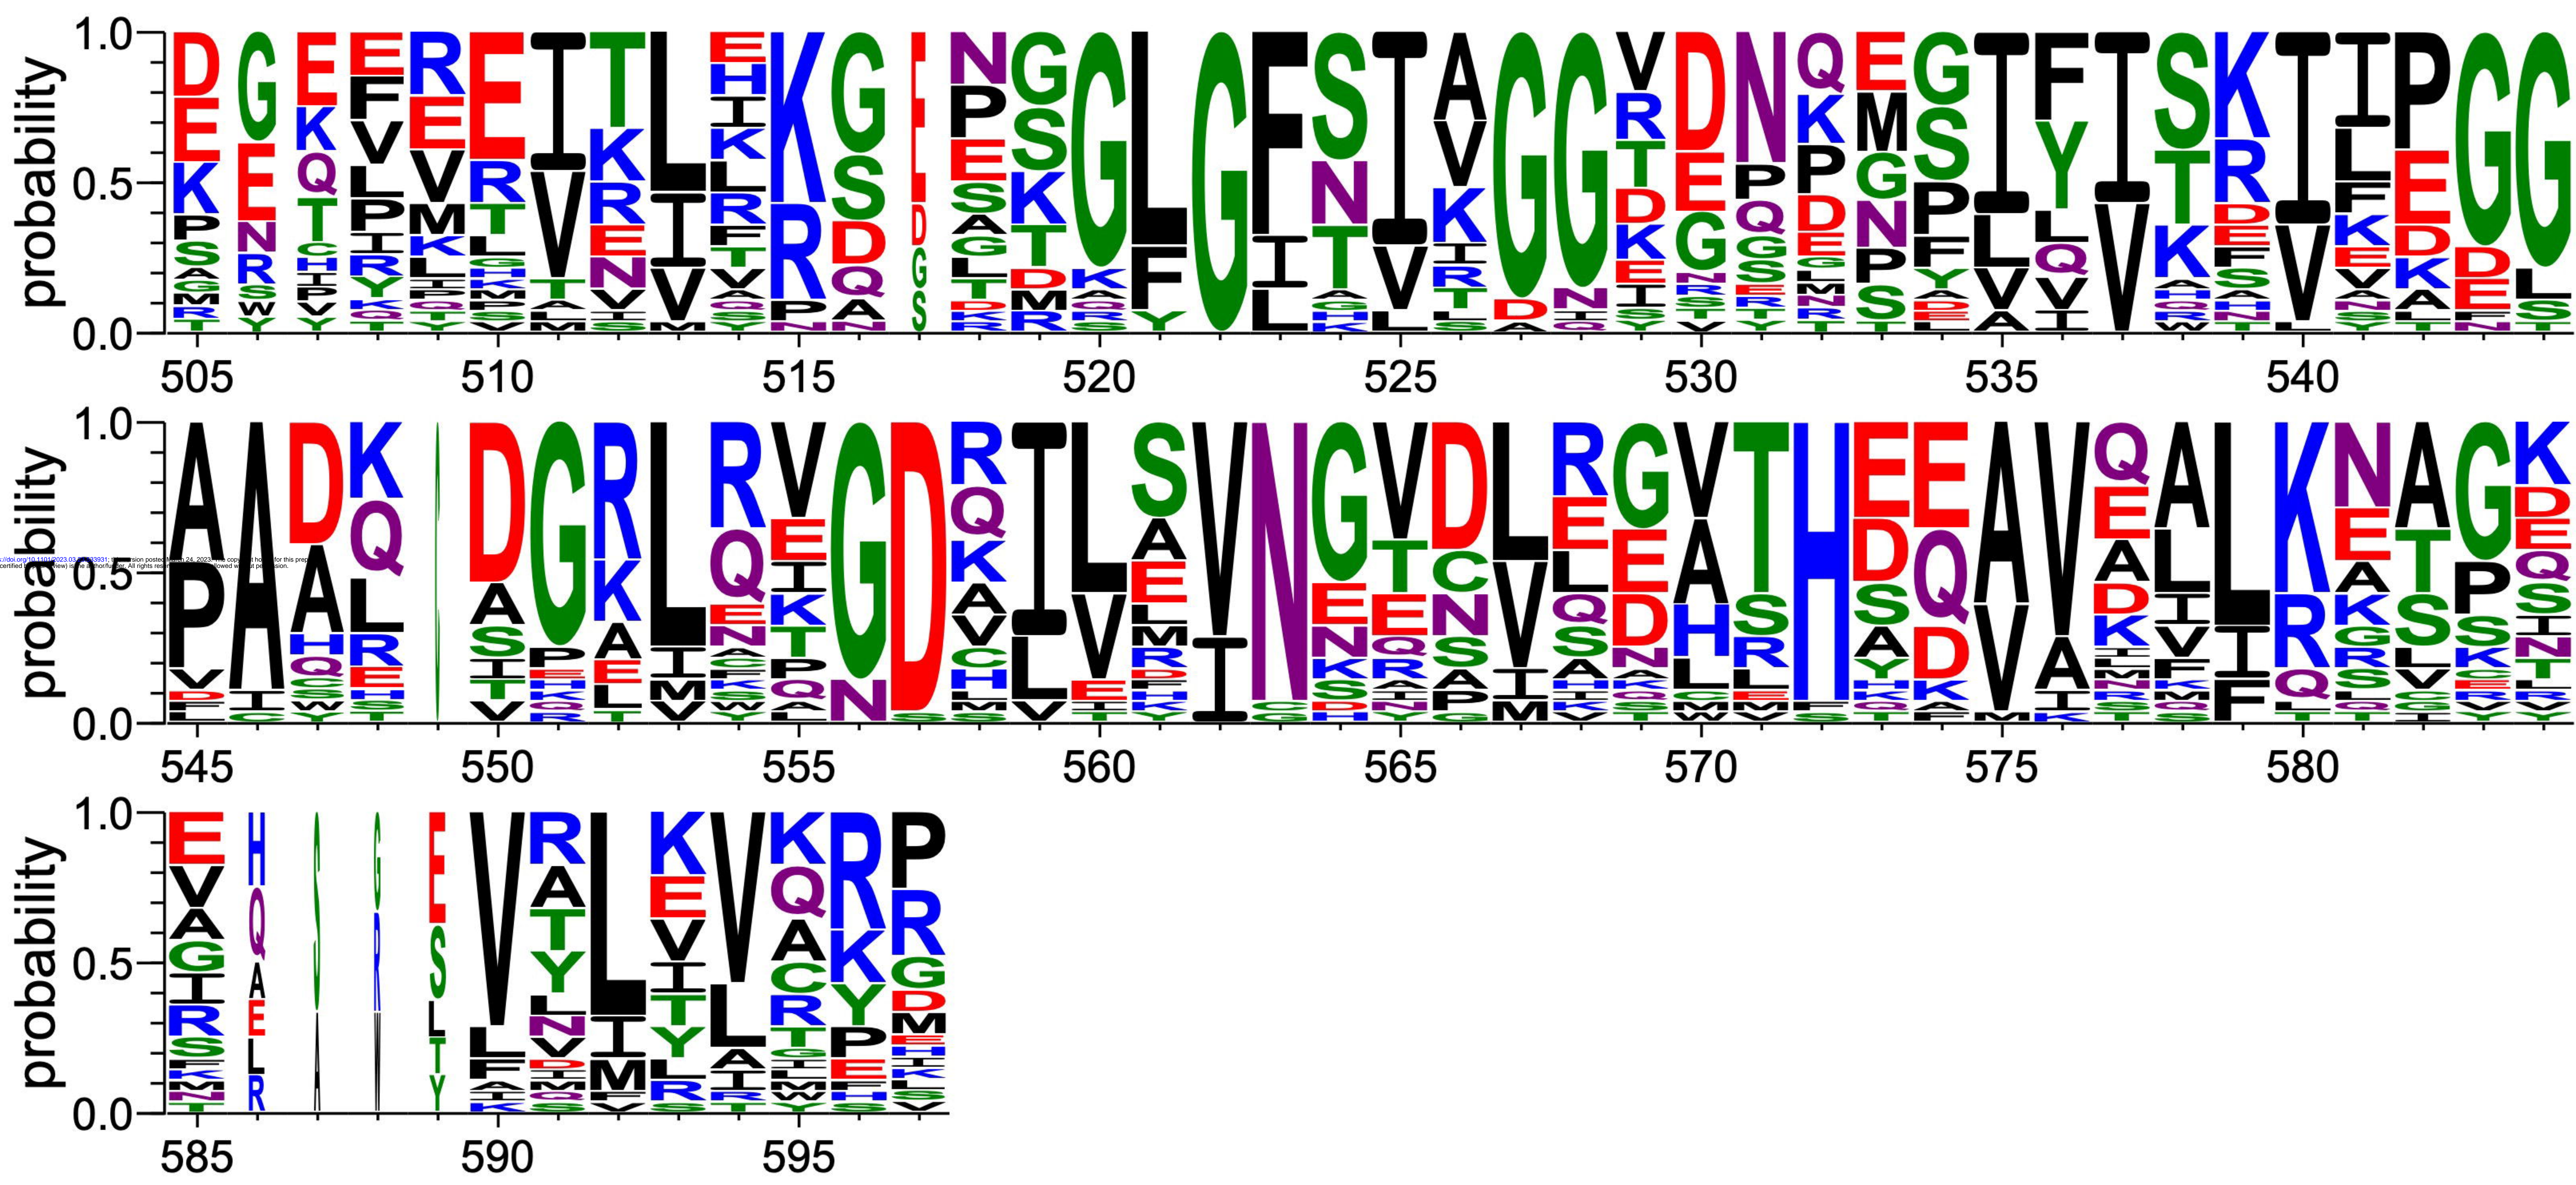

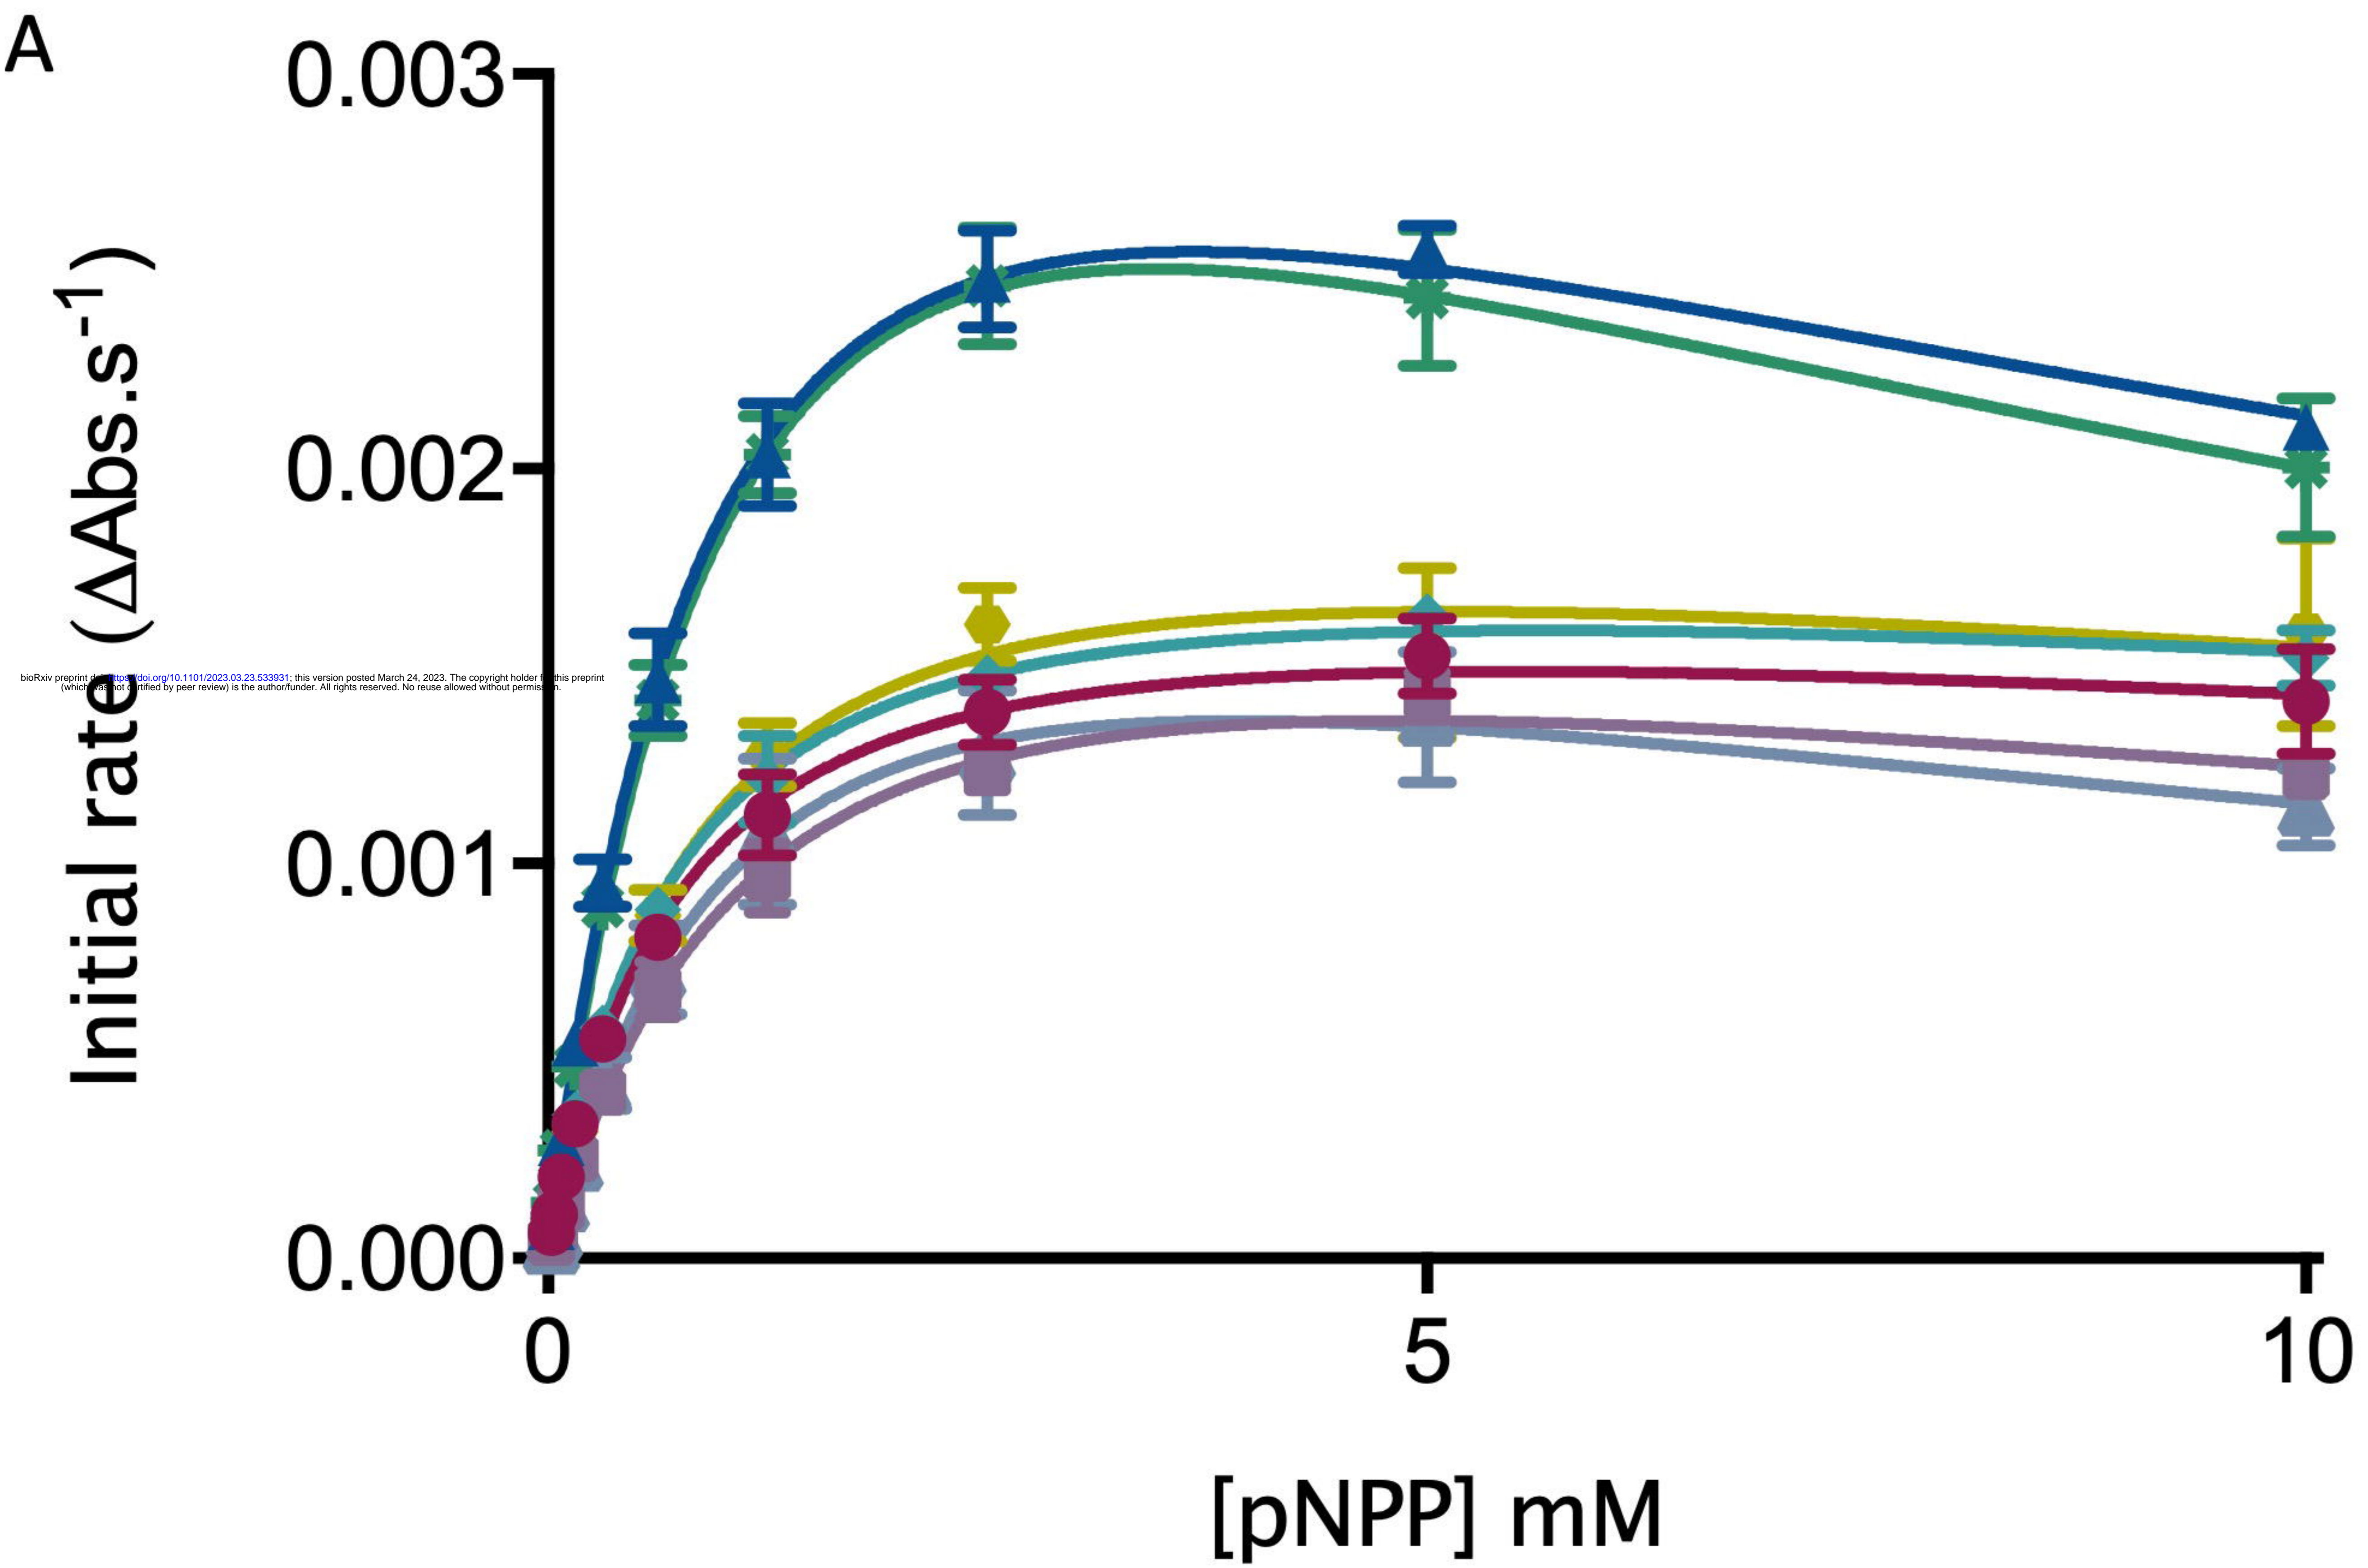

- ▲— Linker-PTP
- \*— shLinker-PTP
- ◇— Bidomain + PBM-16E6
- Bidomain + PBM-HBc
- ▲— Bidomain + PBM-p38 $\gamma$
- Bidomain + PBM-TACE
- Bidomain

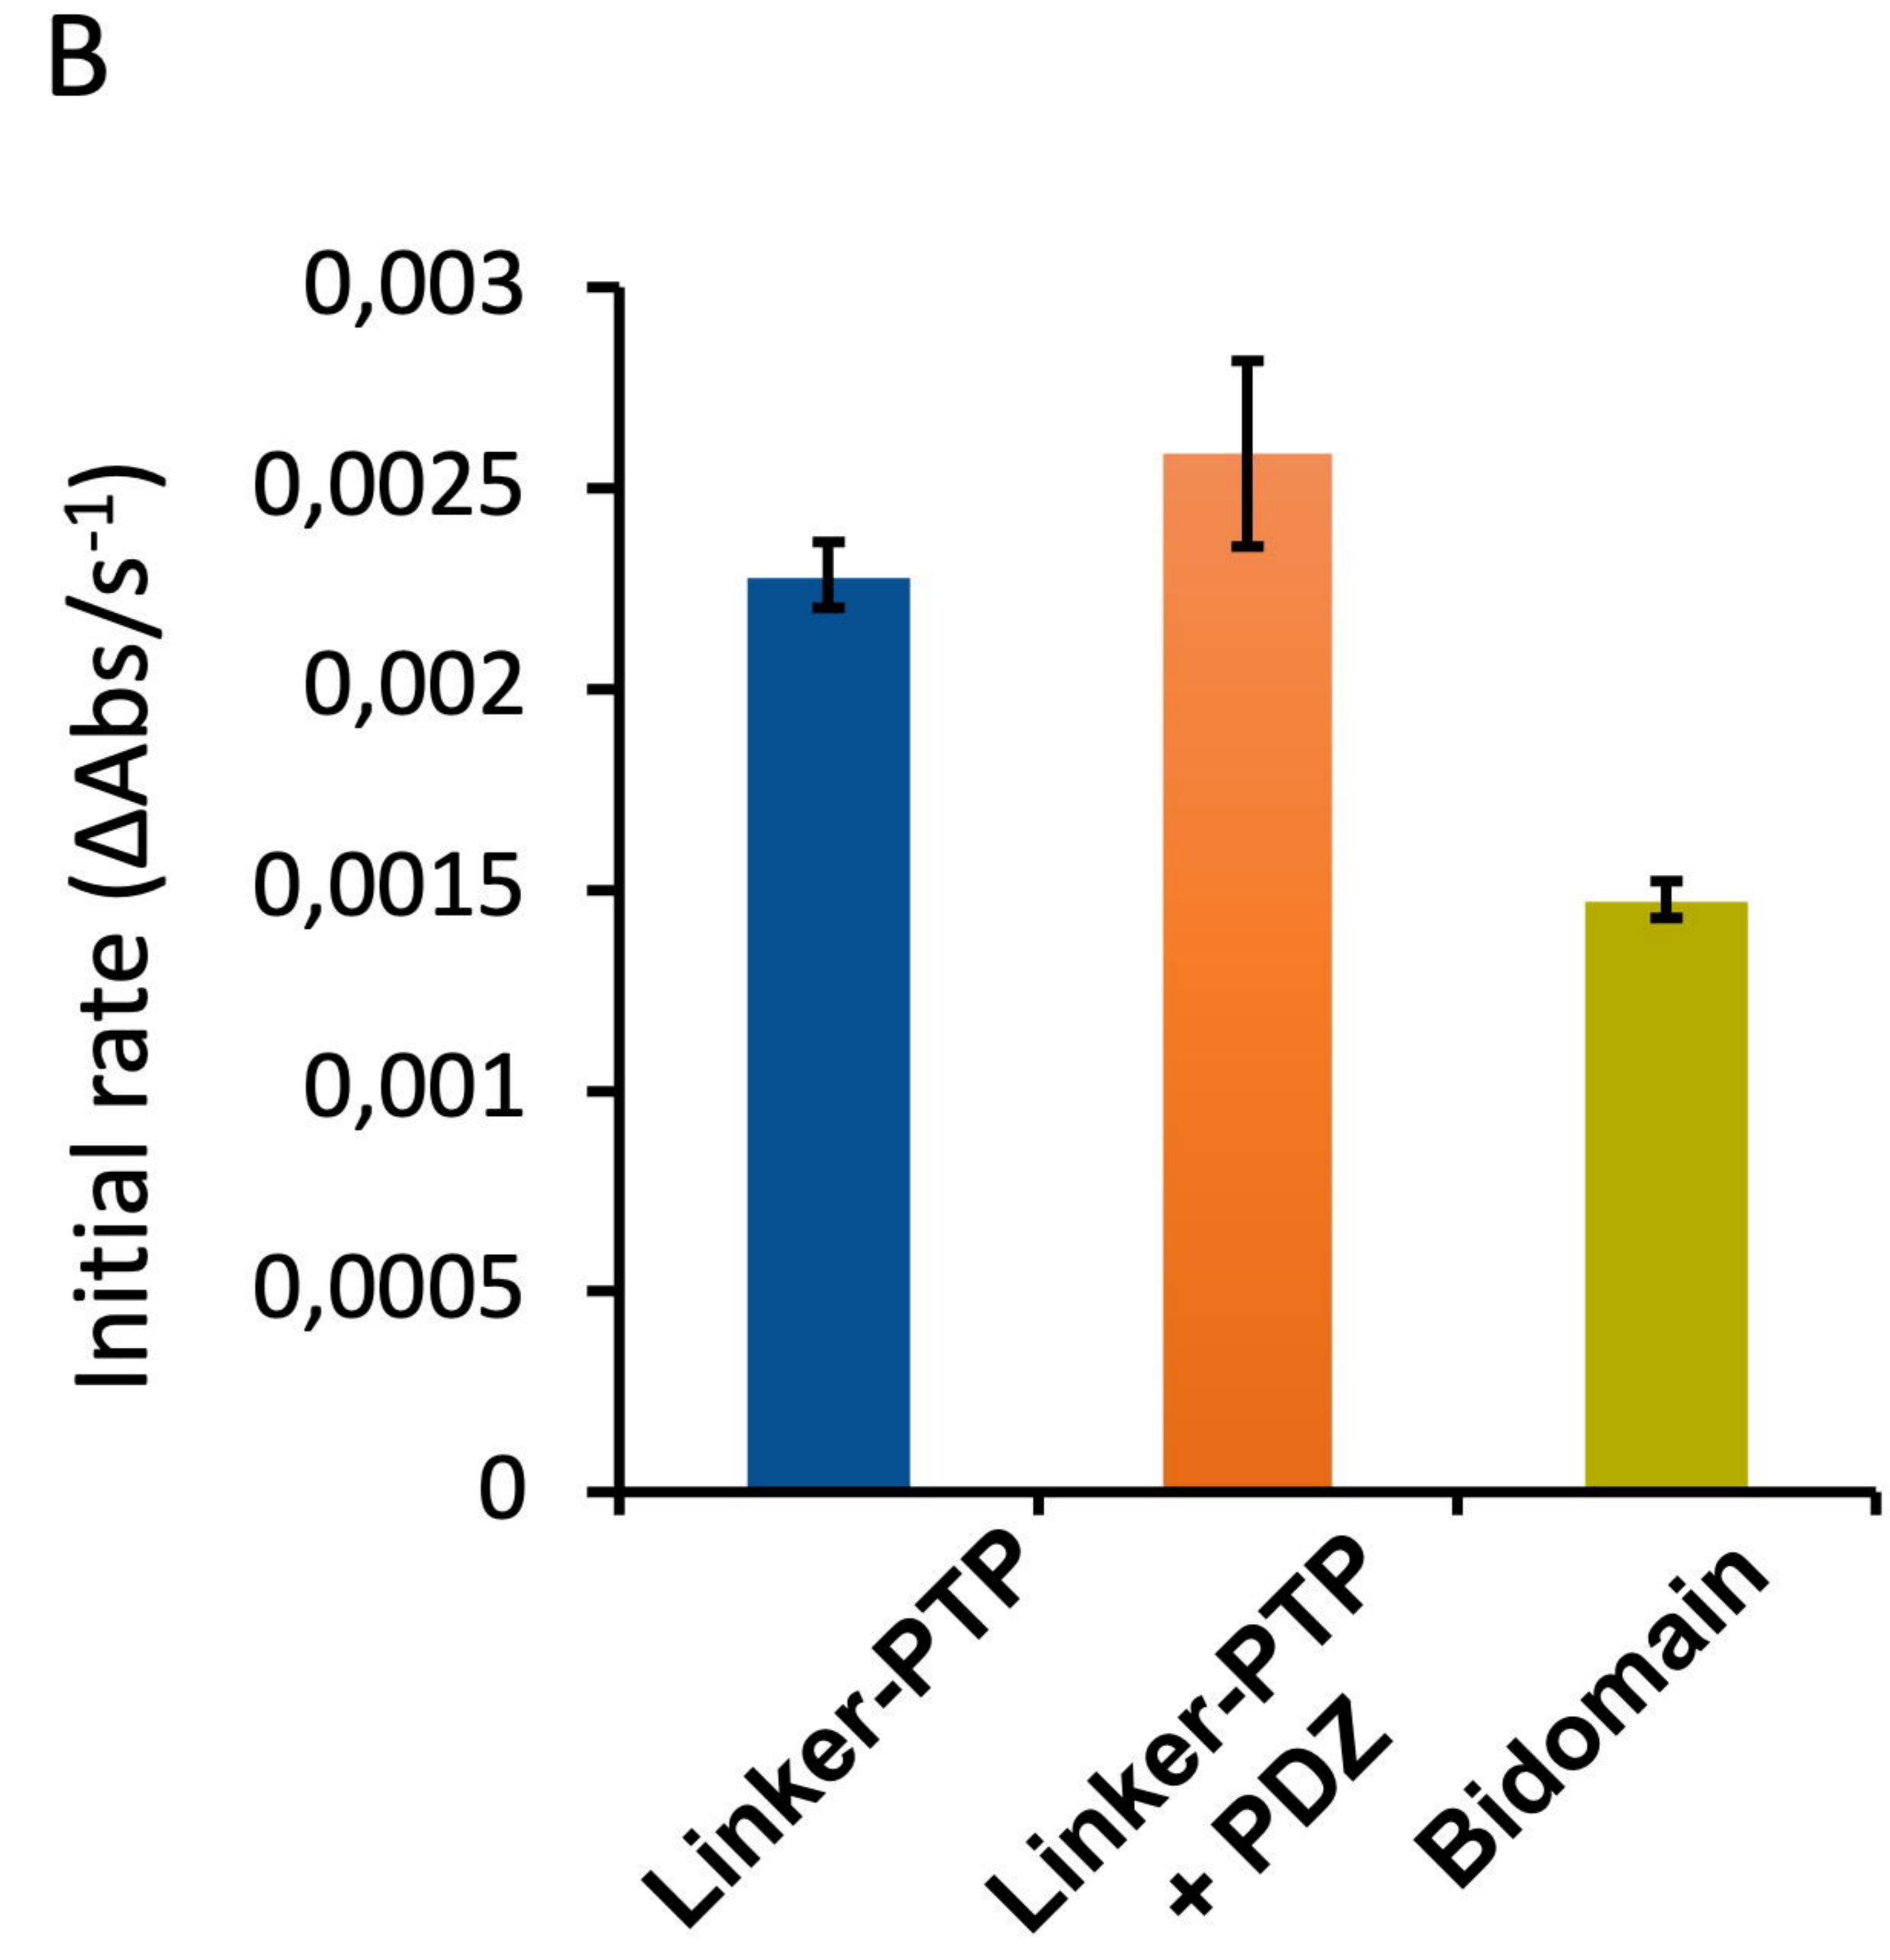

A

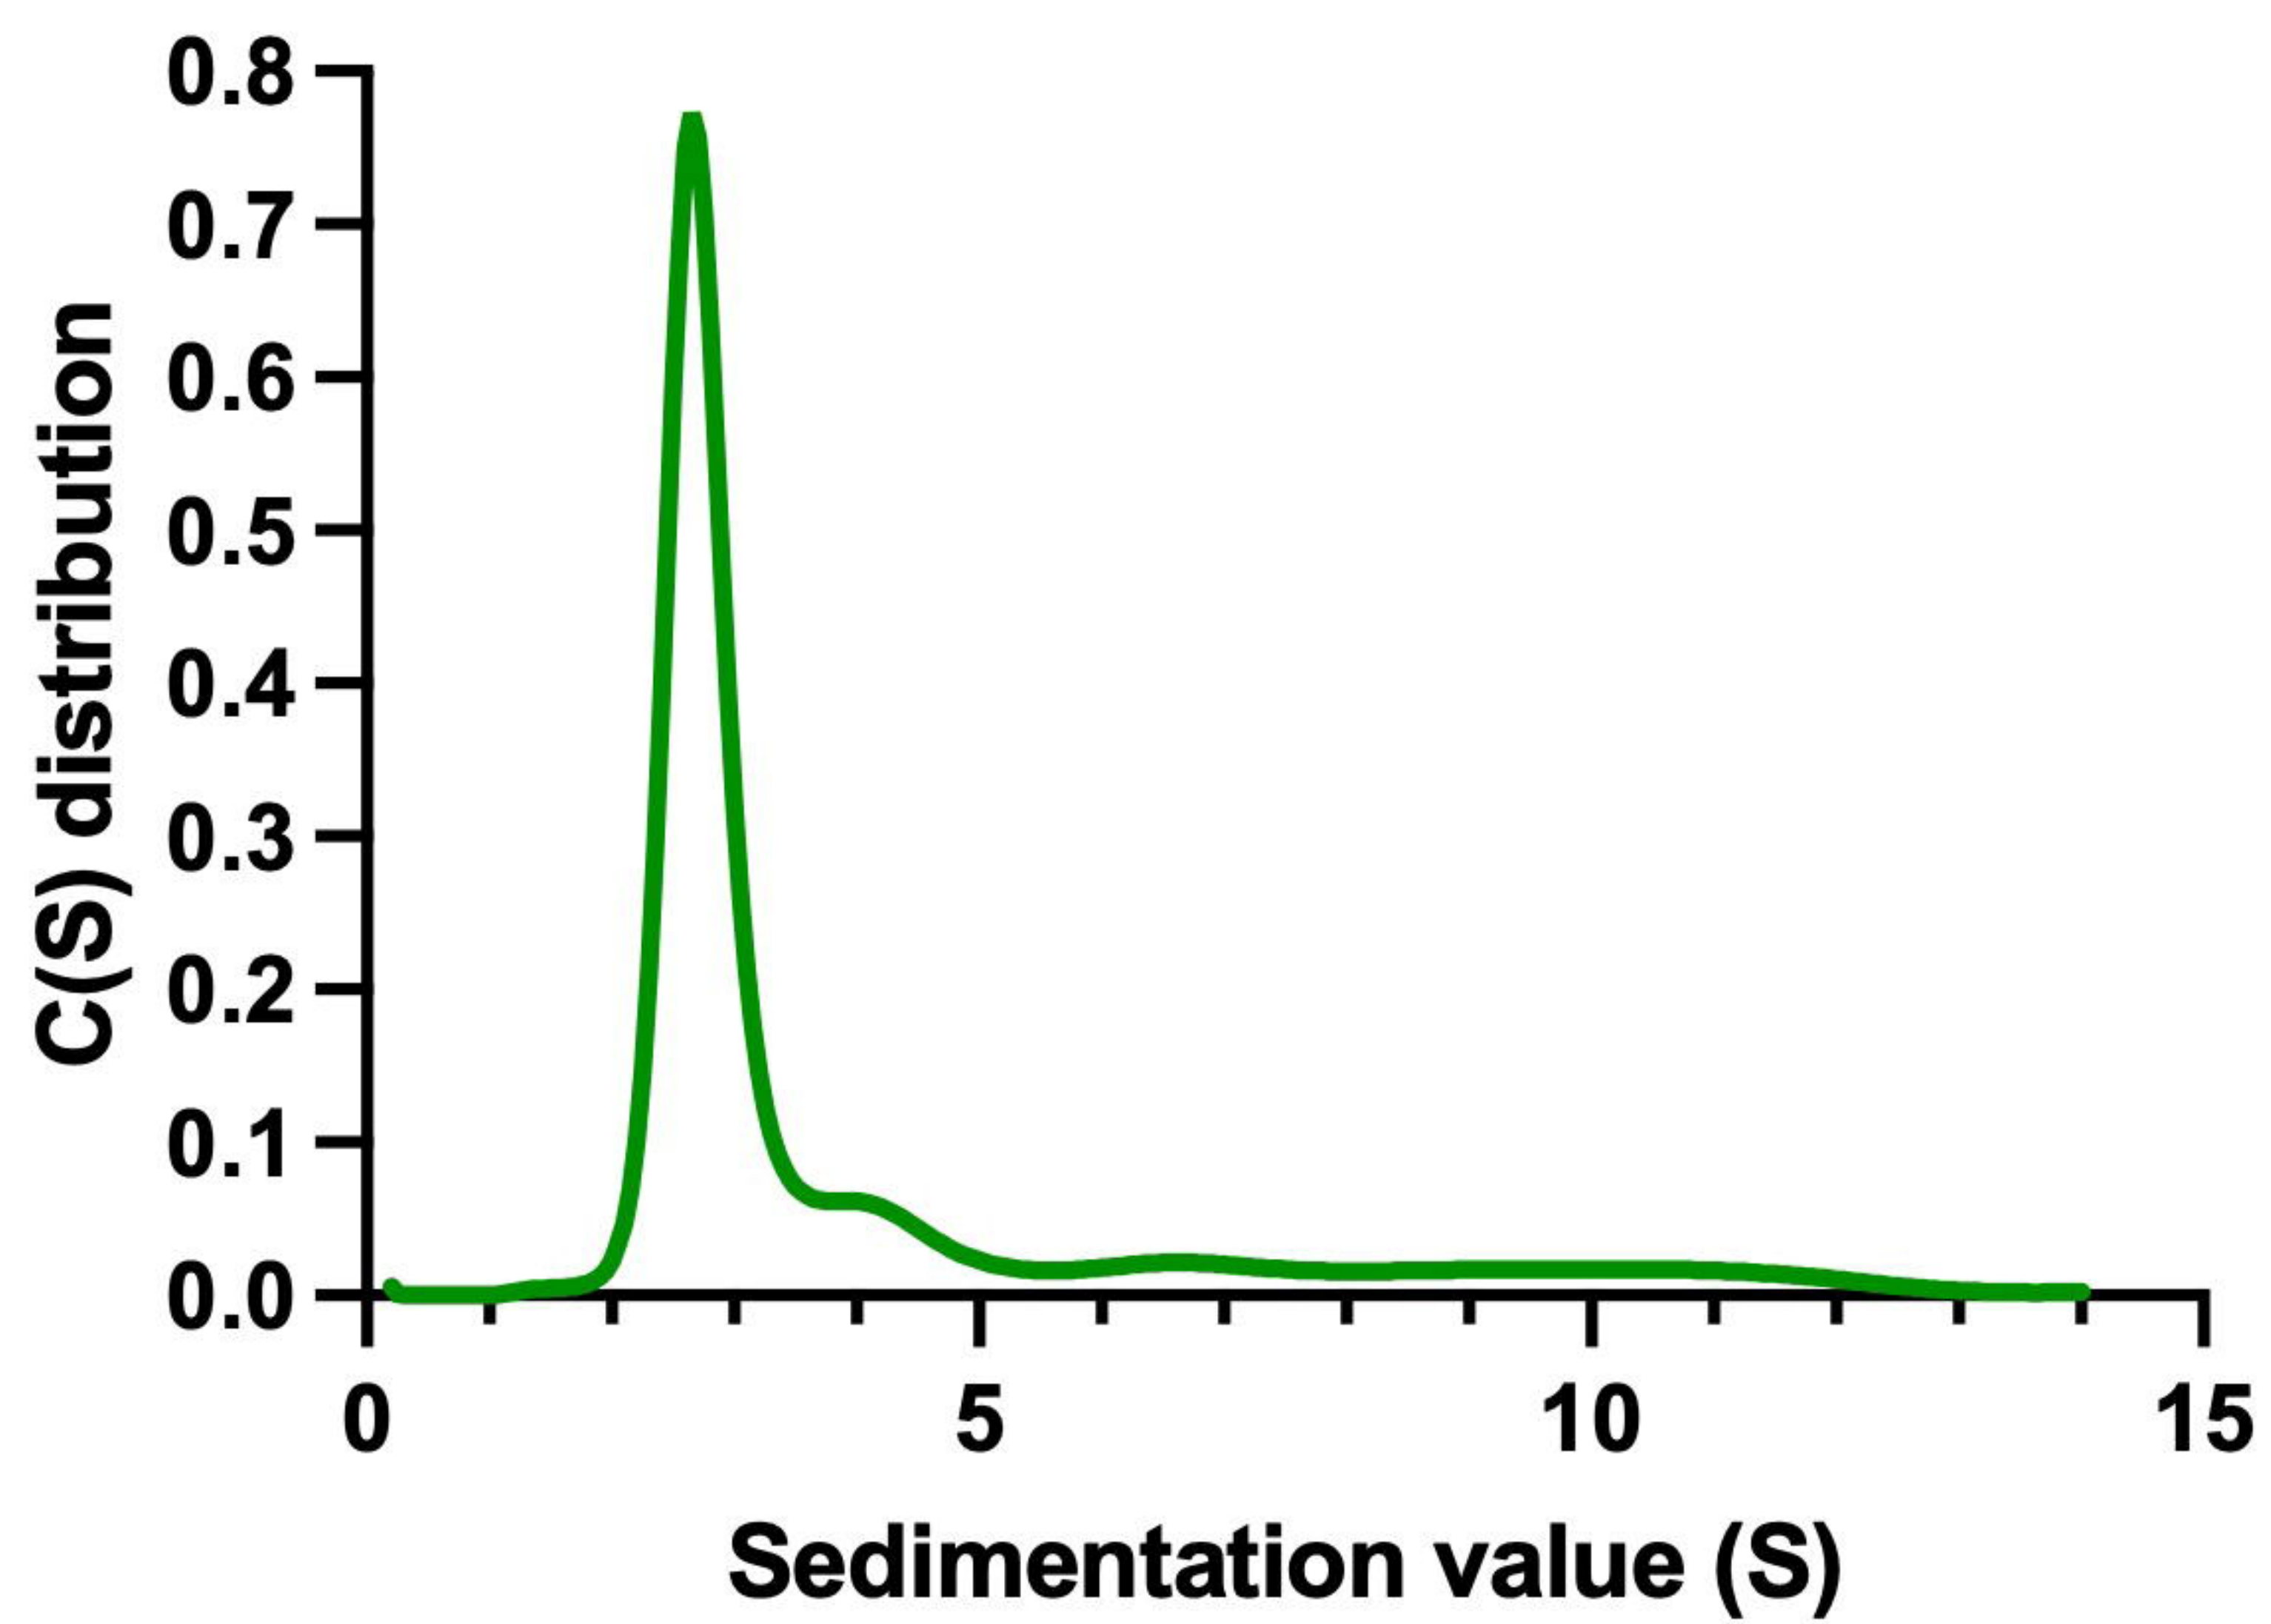

B

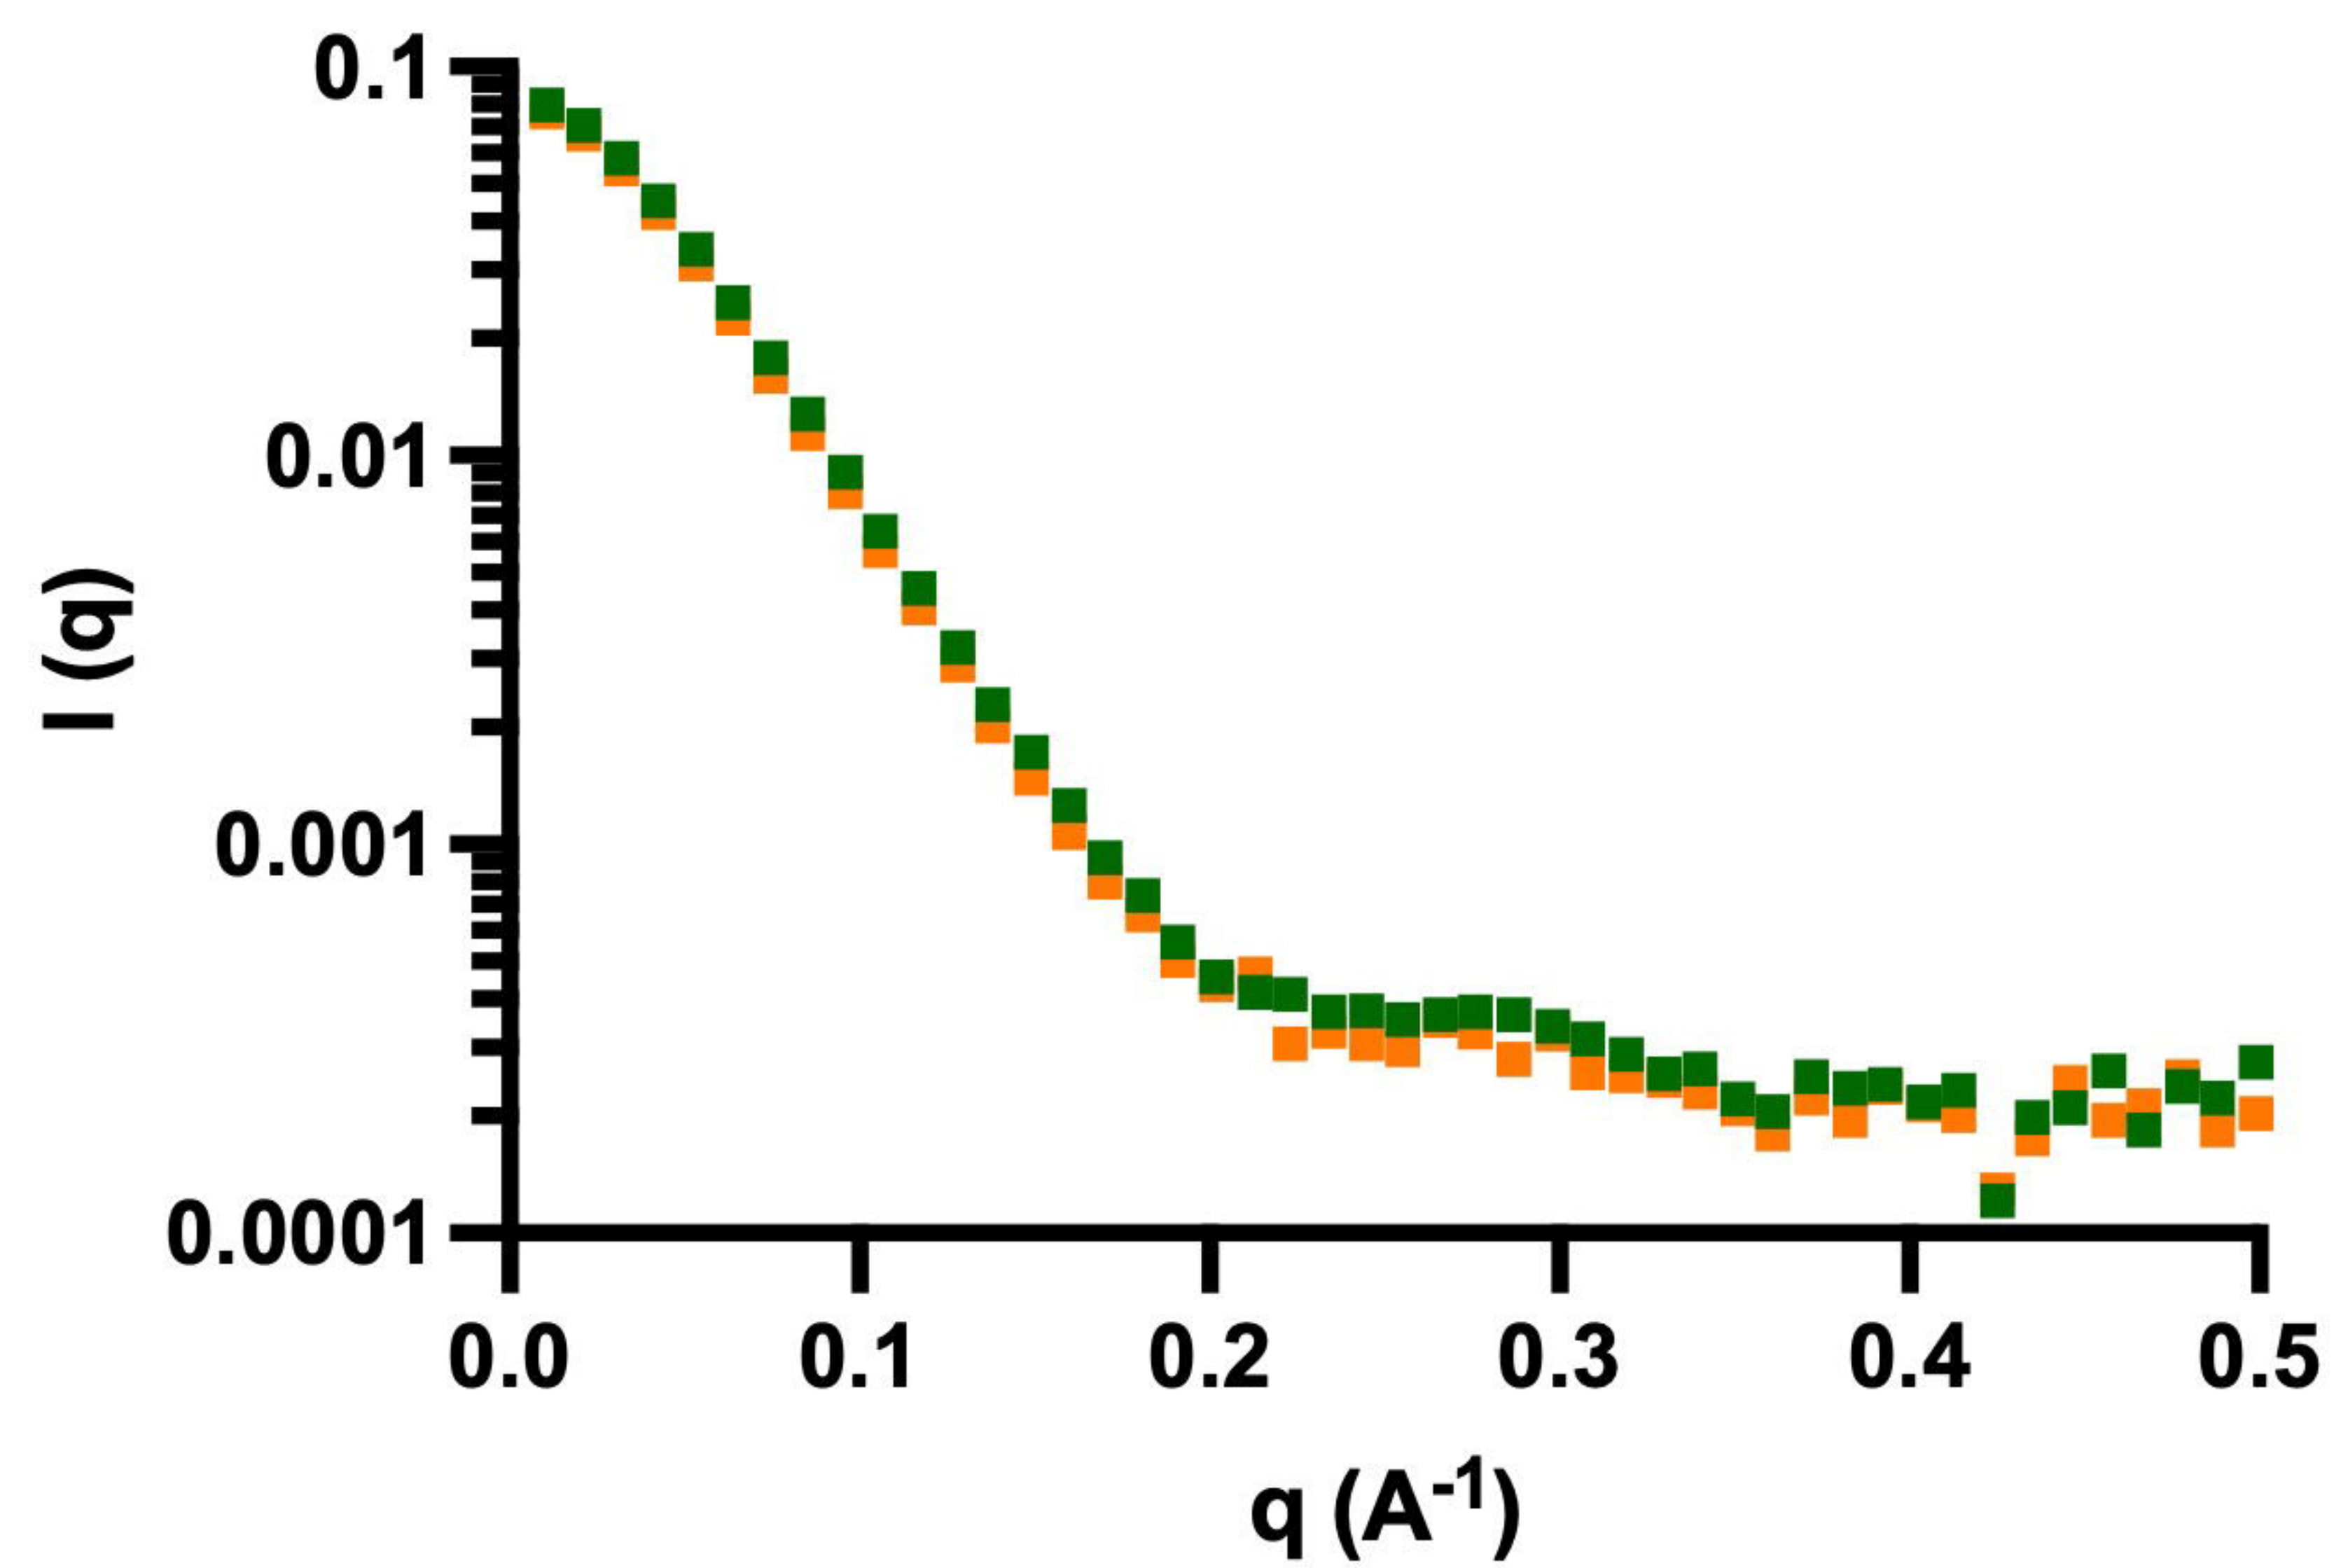

C

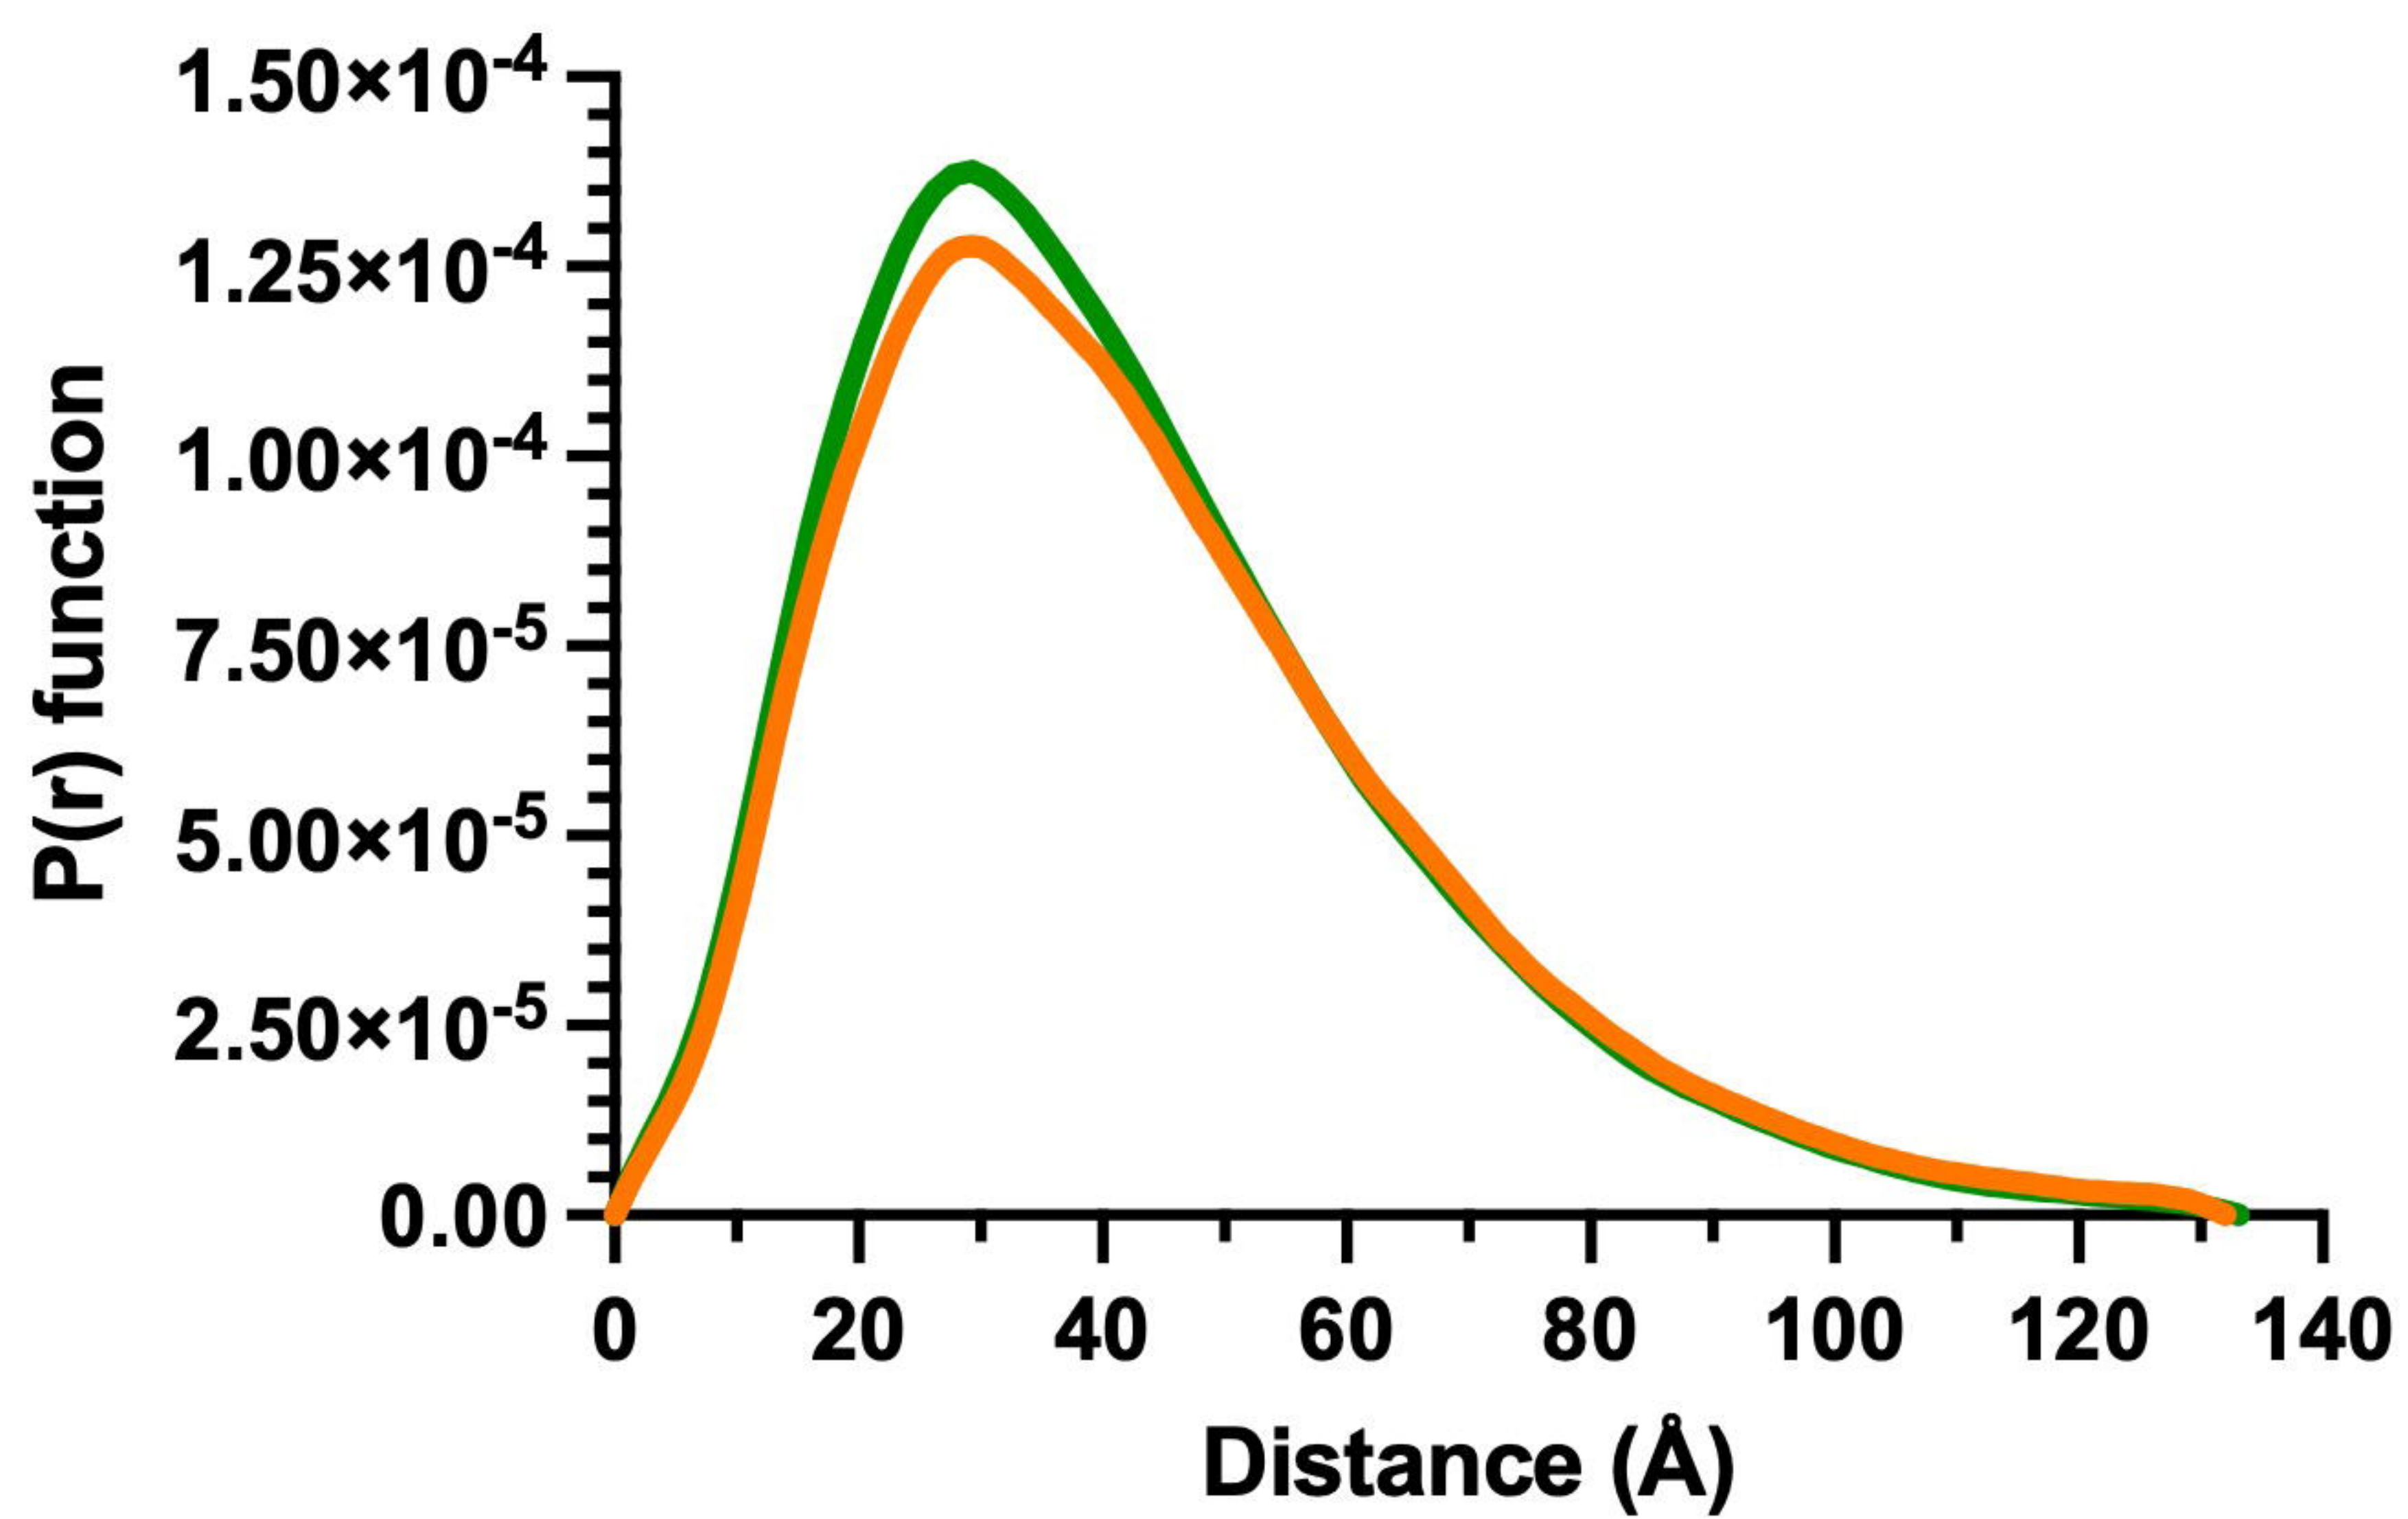

D

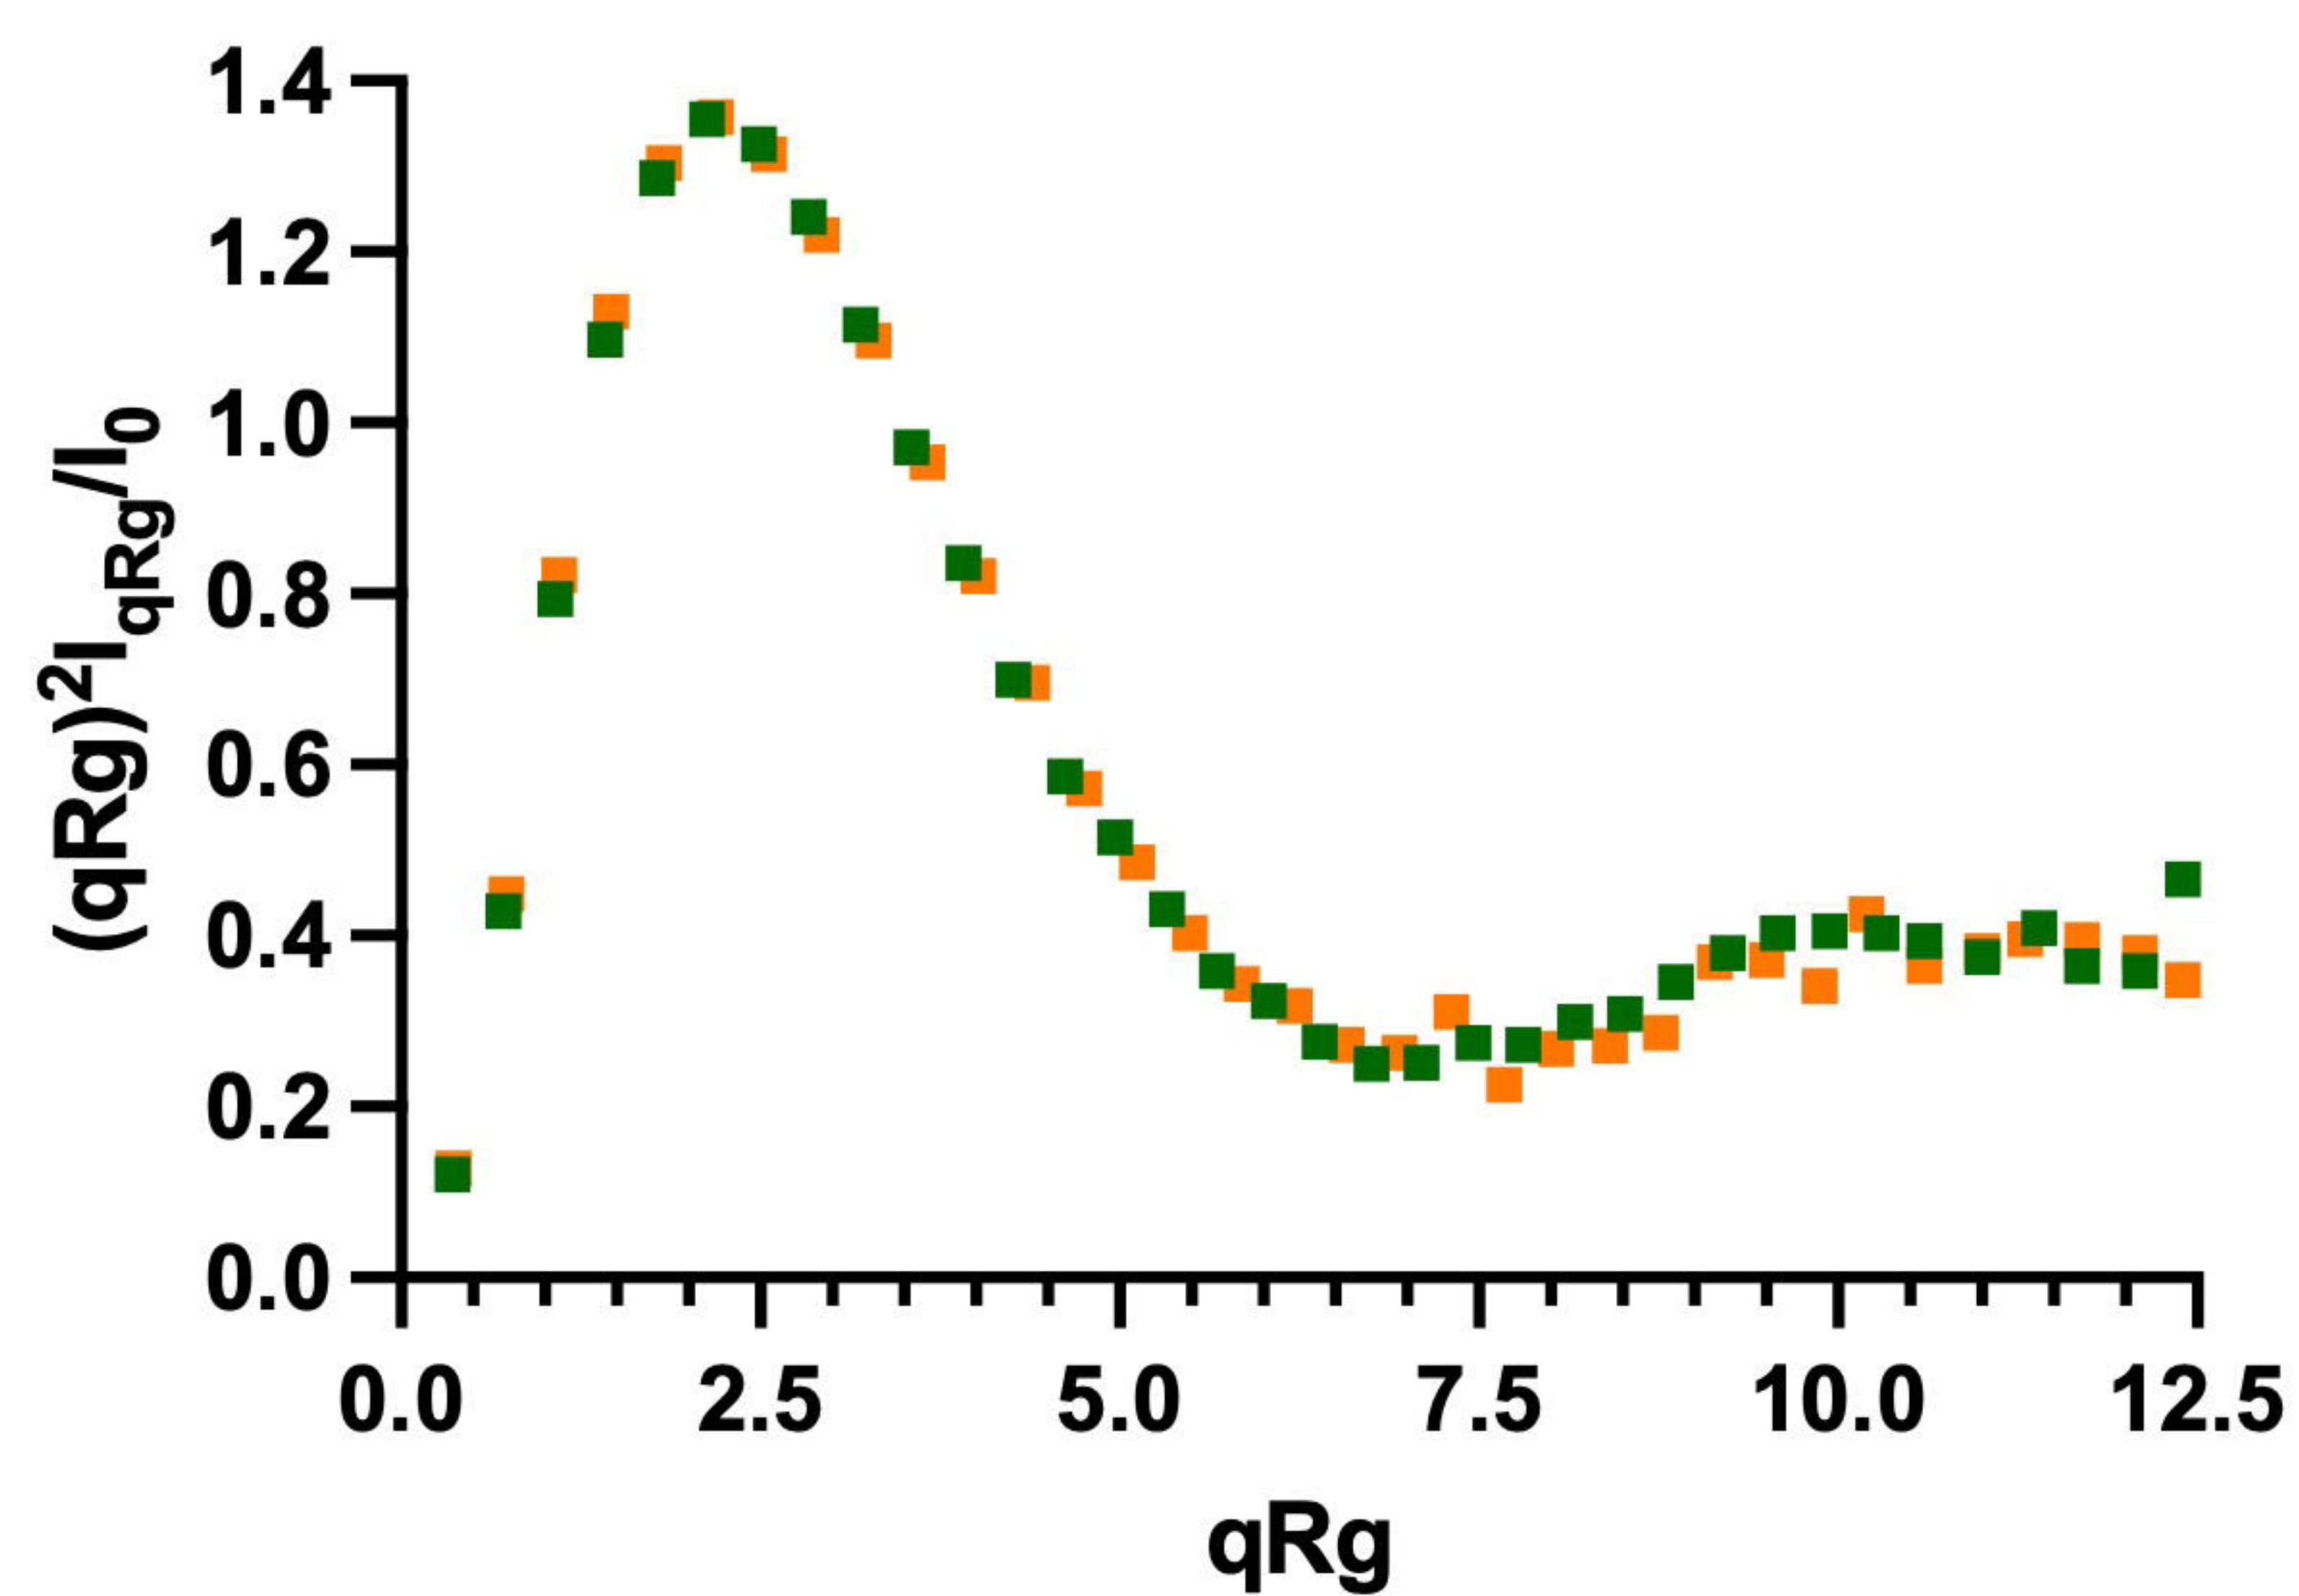

E

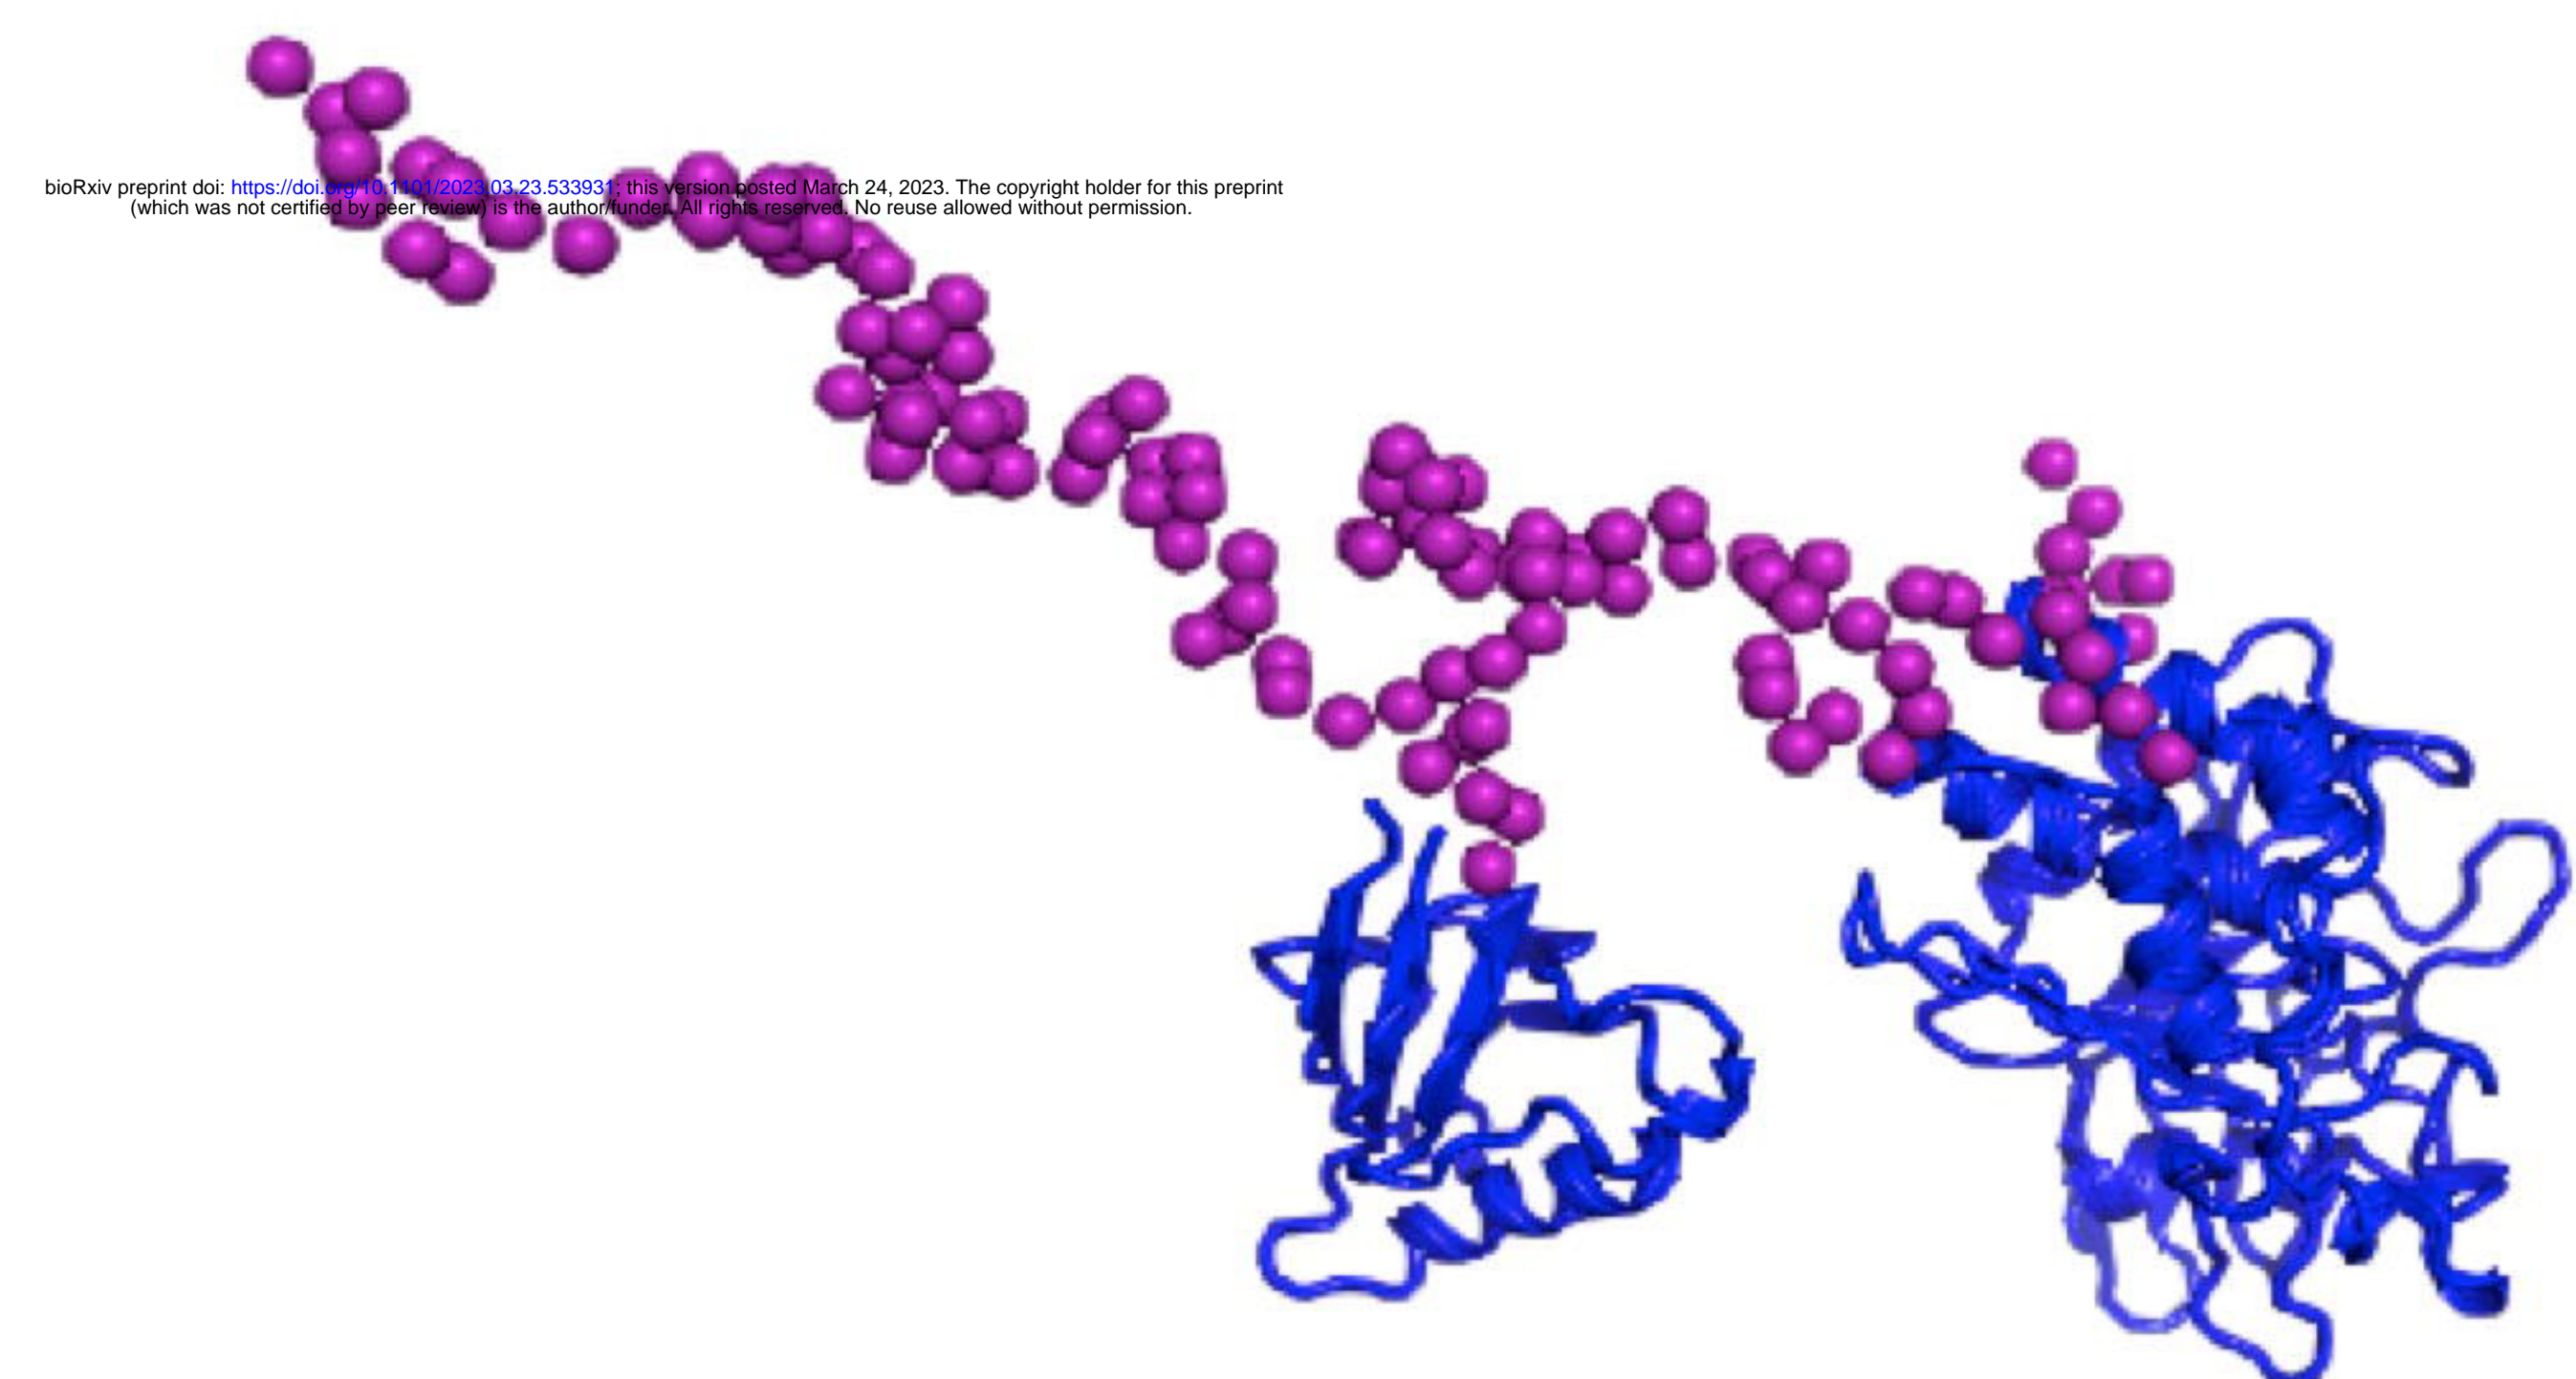

F

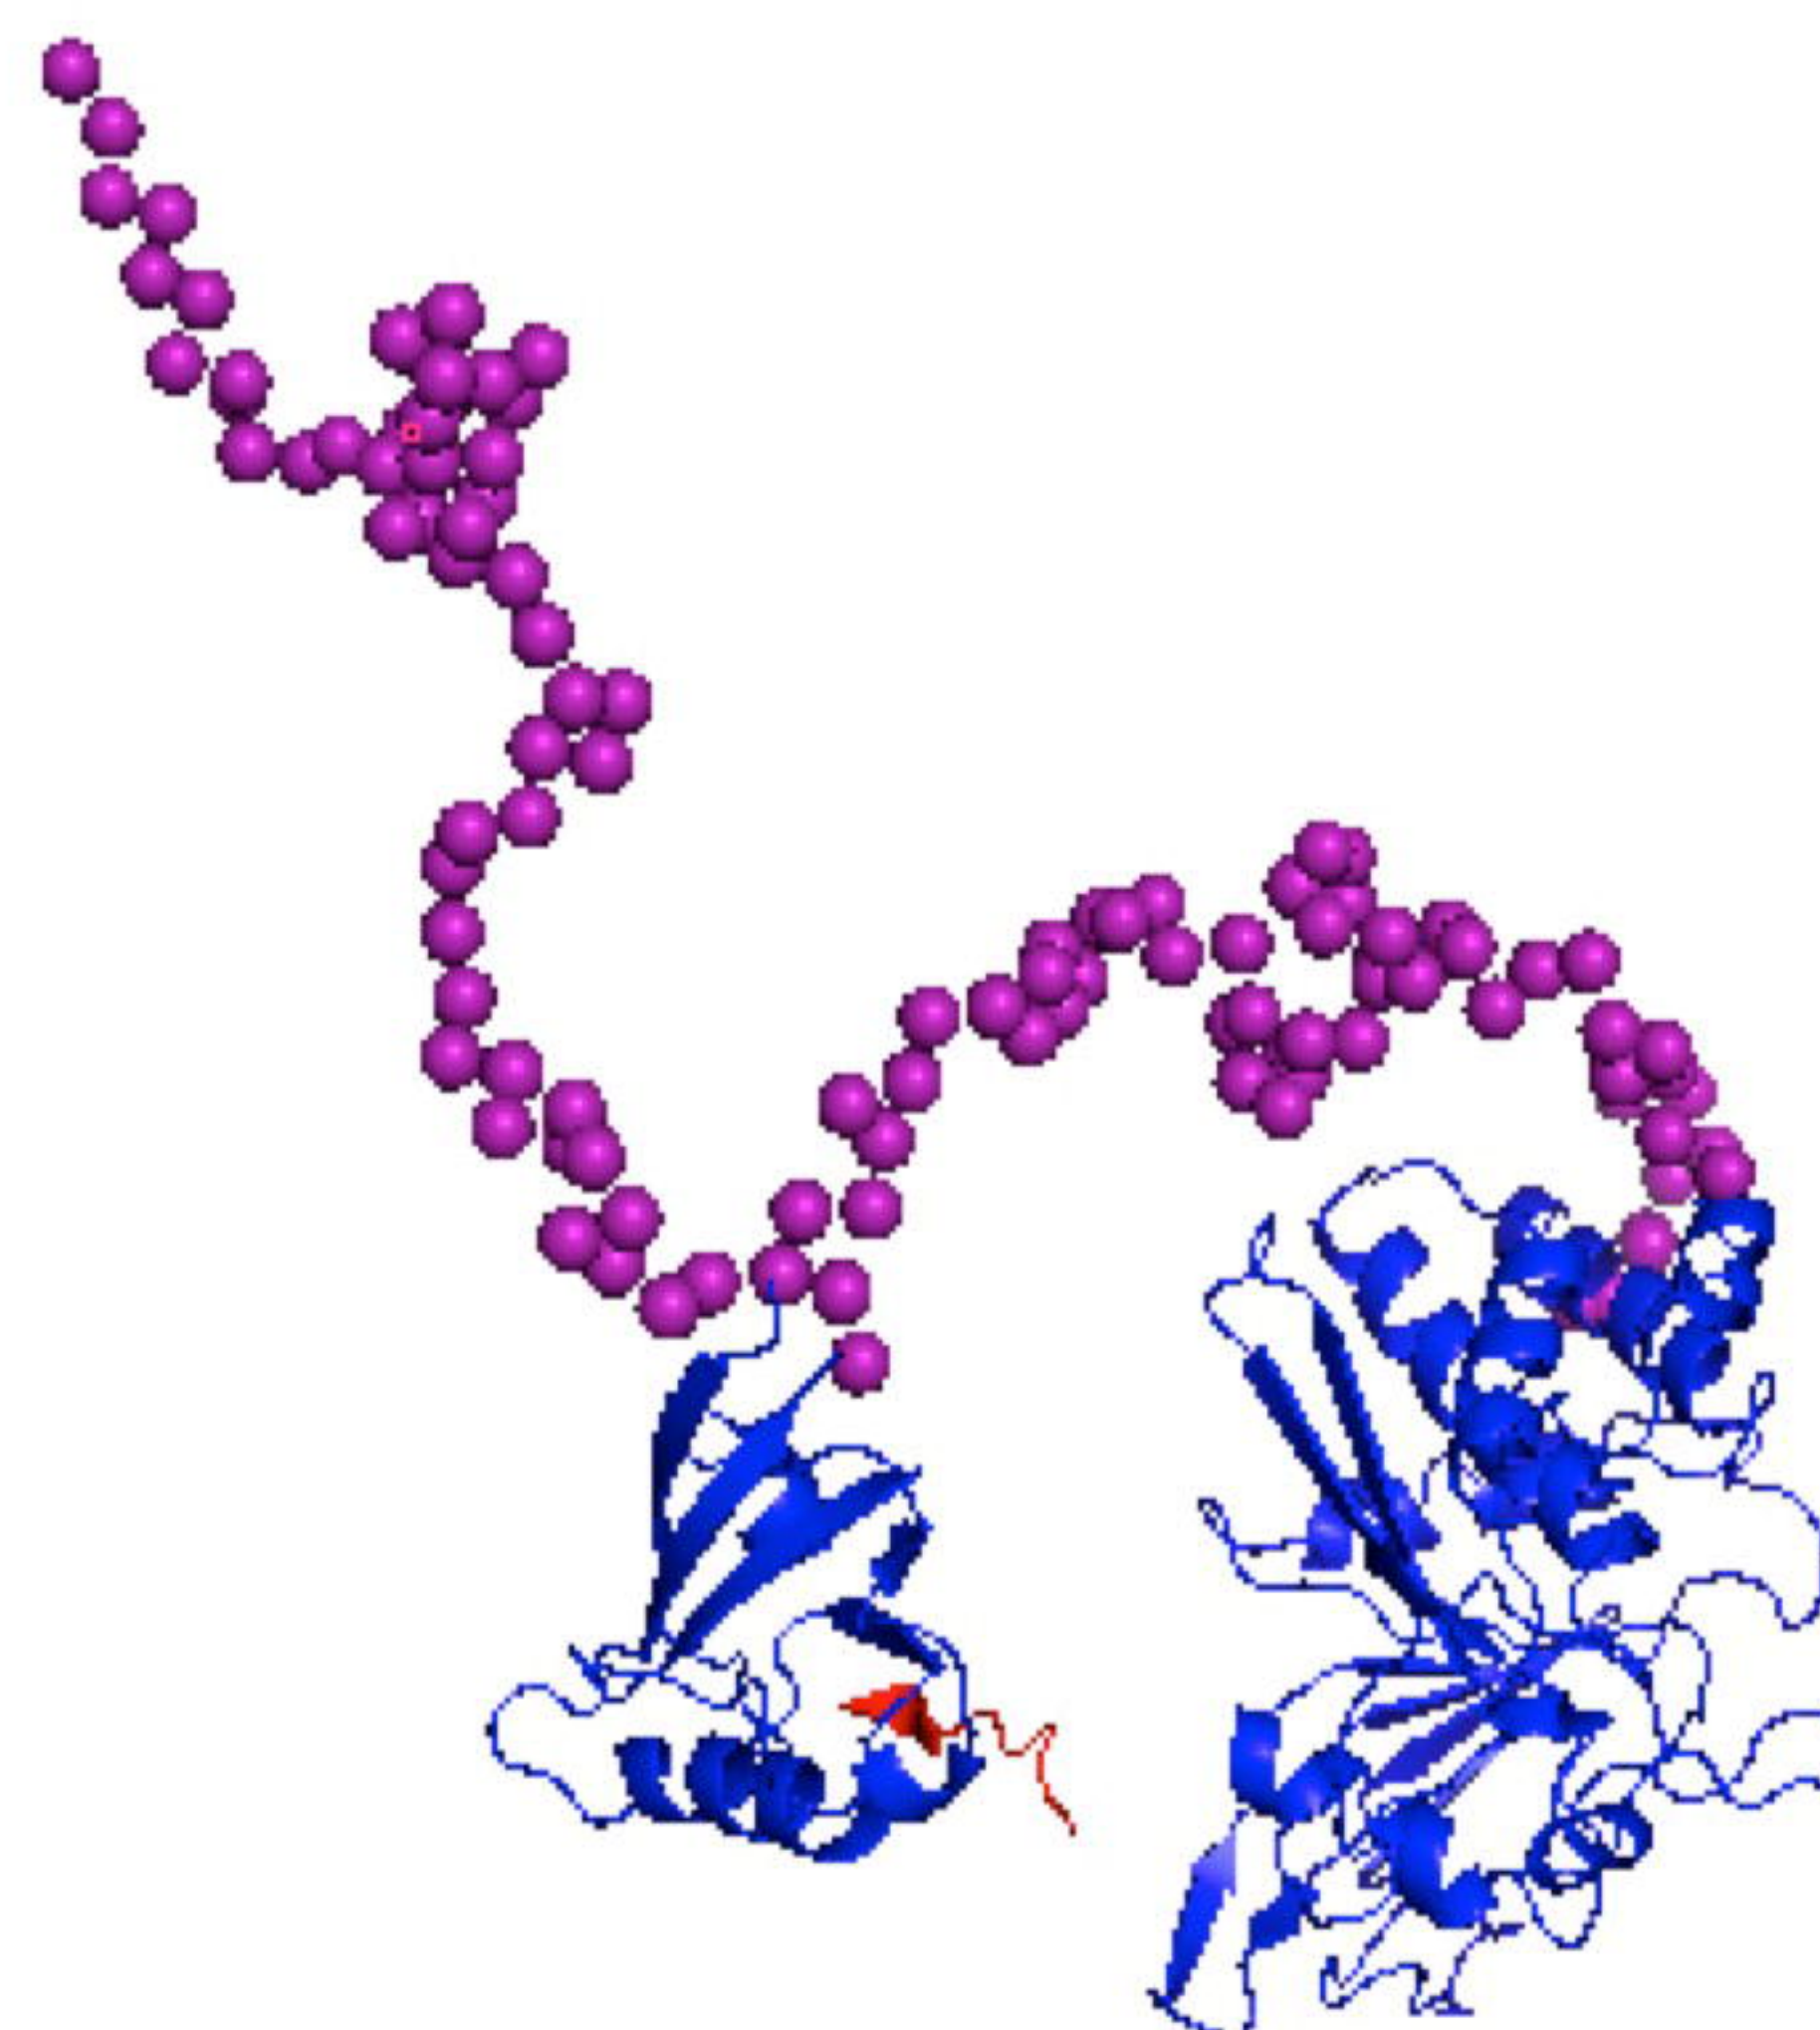

Source: https://www.biorxiv.org/content/10.1101/2023.03.23.533931v1.full.pdf
